# Supplementary material for: HIV treatment regimens and adherence to national guidelines in Australia: an analysis of dispensing data from the Australian pharmaceutical benefits scheme
Source: BMC Public Health. 2019 Jan 3;19:13. doi: 10.1186/s12889-018-6325-5 (PMC6318998; doi:10.1186/s12889-018-6325-5)
Supplement: Supplementary file 1 — Kirby MSD HIV Comorbidity Analysis - PBS Code References. This spreadsheet contains the groupings of medications used to determine comorbidity classifications (XLSX 162 kb) [file 12889_2018_6325_MOESM1_ESM.xlsx]

## Sheet: Index
	Kirby MSD HIV Comorbidity Analysis - PBS Code References
	About
	This document entails all the PBS Item codes used in the drug groups/comorbidities defined in the analysis.
	Index
	Drug Group	Description
	All HIV	All drugs used to treat HIV
	Mental health disorder	Any drug used for Schizophrenia, Bipolar, Anxiety or Depression
	All Antipsychotics	Any drug used for Schizophrenia and/or Bipolar
	Antipsychotics - Drugs for Schiz or Bipolar	Drugs that are used for Schizophrenia and Bipolar
	Antipsychotics - Drugs for Schiz only	Drugs that are used for treating Schizophrenia only
	Bipolar	Drugs used for treating Bipolar (Lithium)
	Anxiety	Drugs used to treat anxiety (benzodiazepines)
	Depression	Antidepressants of all classes
	Bone Disease	Osteoporosis drugs
	Any Lipid Lowering Agent	Cholesterol lowering drugs of any class
	HMG COA Reductase Inhibitor (Statins)	Statins. Includes fixed dosed combinations
	Other Lipid Lowering Agents Only	Cholesterol lowering drugs containing agents other than statin, but also includes FDCs of statin
	Vasodilators and antianginal meds	Organic Nitrates and other vasodilators used in cardiac diseases. Does not include peripheral vasodilator (phenoxybenzamine)
	Perhexiline	Perhexiline only
	Antineoplastic	All drugs used to treat cancers. Does not include hormonal treatments
	Hypertension	All antihypertensives
	ACE Inhibitors	Subset of Hypertension
	Angiotensin II Antagonist	Subset of Hypertension
	Beta Blocker	Subset of Hypertension
	Calcium Channel Blockers	Subset of Hypertension
	Diuretics	Subset of Hypertension
	All Diabetes	Any diabetes medication
	Diabetes - Excl Insulin	Subset of Diabetes
	Insulin Only	Subset of Diabetes
	Disclaimer The data utilised by Prospection Pty Ltd ABN 70 137 120 471 in preparation of this report was sourced from the Australian government (Medicare Australia) under the terms of a written contract with the Australian government. The results of Prospection’s analysis of the data are supplied to its clients pursuant to a Medicare Australia approved Specific Purpose request which we made on yo…

## Sheet: HIV
	All HIV Drugs
	Drug Group	Drug	Drug Code	Brands	Form and Strength	ATC Code
	Aptivus	tipranavir	9656F	Aptivus	Oral liquid 100 mg per mL, 95 mL	J05AE09
		tipranavir	9676G	Aptivus	Oral liquid 100 mg per mL, 95 mL	J05AE09
		tipranavir	10344K	Aptivus	tipranavir 250 mg capsule, 120	J05AE09
		tipranavir	9567M	Aptivus	tipranavir 250 mg capsule, 120	J05AE09
		tipranavir	9610T	Aptivus	tipranavir 250 mg capsule, 120	J05AE09
	Atripla	tenofovir + emtricitabine + efavirenz	10297Y	Atripla	tenofovir disoproxil fumarate 300 mg + emtricitabine 200 mg + efavirenz 600 mg tablet, 30	J05AR06
		tenofovir + emtricitabine + efavirenz	9565K	Atripla	tenofovir disoproxil fumarate 300 mg + emtricitabine 200 mg + efavirenz 600 mg tablet, 30	J05AR06
		tenofovir + emtricitabine + efavirenz	9650X	Atripla	tenofovir disoproxil fumarate 300 mg + emtricitabine 200 mg + efavirenz 600 mg tablet, 30	J05AR06
	Celsentri	maraviroc	10318C	Celsentri	maraviroc 150 mg tablet, 60	J05AX09
		maraviroc	5792W	Celsentri	maraviroc 150 mg tablet, 60	J05AX09
		maraviroc	9572T	Celsentri	maraviroc 150 mg tablet, 60	J05AX09
		maraviroc	10355B	Celsentri	maraviroc 300 mg tablet, 60	J05AX09
		maraviroc	5793X	Celsentri	maraviroc 300 mg tablet, 60	J05AX09
		maraviroc	9573W	Celsentri	maraviroc 300 mg tablet, 60	J05AX09
	Combivir	lamivudine + zidovudine	10284G	Lamivudine 150 mg + Zidovudine 300 mg Alphaph	lamivudine 150 mg + zidovudine 300 mg tablet, 60	J05AR01
		lamivudine + zidovudine	5775Y	Lamivudine 150 mg + Zidovudine 300 mg Alphaph	lamivudine 150 mg + zidovudine 300 mg tablet, 60	J05AR01
		lamivudine + zidovudine	6234D	Lamivudine 150 mg + Zidovudine 300 mg Alphaph	lamivudine 150 mg + zidovudine 300 mg tablet, 60	J05AR01
	Crixivan	indinavir	10363K	Crixivan 400 mg	indinavir 400 mg capsule, 180	J05AE02
		indinavir	5752R	Crixivan 400 mg	indinavir 400 mg capsule, 180	J05AE02
		indinavir	6202K	Crixivan 400 mg	indinavir 400 mg capsule, 180	J05AE02
		indinavir sulfate	6344X	Crixivan 100 mg	Capsule 100 mg (base)	J05AE02
		indinavir sulfate	6201J	Crixivan 200 mg	Capsule 200 mg (base)	J05AE02
	Delavirdine	delavirdine mesylate	5659W	Rescriptor	Tablet 100 mg	J05AG02
		delavirdine mesylate	6243N	Rescriptor	Tablet 100 mg	J05AG02
	Descovy	emtricitabine + tenofovir alafenamide	11099E	Descovy	emtricitabine 200 mg + tenofovir alafenamide 10 mg tablet, 30	J05AR
		emtricitabine + tenofovir alafenamide	11113X	Descovy	emtricitabine 200 mg + tenofovir alafenamide 25 mg tablet, 30	J05AR
		tenofovir + emtricitabine	10946D	Descovy 10/200	tenofovir alafenamide 10mg + emtricitabine 200 mg tablet, 30	J05AR
		tenofovir + emtricitabine	10966E	Descovy 25/200	tenofovir alafenamide 25mg + emtricitabine 200 mg tablet, 30	J05AR
	Dolutegravir	dolutegravir	10065R	Tivicay	dolutegravir 50 mg tablet, 30	J05AX12
		dolutegravir	10070B	Tivicay	dolutegravir 50 mg tablet, 30	J05AX12
		dolutegravir	10283F	Tivicay	dolutegravir 50 mg tablet, 30	J05AX12
	Edurant	rilpivirine	10298B	Edurant	rilpivirine 25 mg tablet, 30	J05AG05
		rilpivirine	1170N	Edurant	rilpivirine 25 mg tablet, 30	J05AG05
		rilpivirine	1173R	Edurant	rilpivirine 25 mg tablet, 30	J05AG05
	Emtriva	emtricitabine	10274R	Emtriva	emtricitabine 200 mg capsule, 30	J05AF09
		emtricitabine	5709L	Emtriva	emtricitabine 200 mg capsule, 30	J05AF09
		emtricitabine	6137B	Emtriva	emtricitabine 200 mg capsule, 30	J05AF09
	Etravirine	etravirine	5736X	Intelence	Tablet 100 mg	J05AG04
		etravirine	9639H	Intelence	Tablet 100 mg	J05AG04
		etravirine	10301E	Intelence	etravirine 200 mg tablet, 60	J05AG04
		etravirine	5062K	Intelence	etravirine 200 mg tablet, 60	J05AG04
		etravirine	5084N	Intelence	etravirine 200 mg tablet, 60	J05AG04
	Eviplera	emtricitabine + rilpivirine + tenofovir	1490K	Eviplera	emtricitabine 200 mg + rilpivirine 25 mg + tenofovir disoproxil fumarate 300 mg tablet, 30	J05AR08
		emtricitabine + rilpivirine + tenofovir	1491L	Eviplera	emtricitabine 200 mg + rilpivirine 25 mg + tenofovir disoproxil fumarate 300 mg tablet, 30	J05AR08
		tenofovir + emtricitabine + rilpivirine	10314W	Eviplera	tenofovir disoproxil fumarate 300 mg + emtricitabine 200 mg + rilpivirine 25 mg tablet, 30	J05AR08
	Fuzeon	enfuvirtide	10365M	Fuzeon	enfuvirtide 90 mg injection [60 vials] (&) inert substance diluent [60 x 1.1 mL vials], 1 pack	J05AX07
		enfuvirtide	5710M	Fuzeon	enfuvirtide 90 mg injection [60 x 90 mg vials] (&) inert substance diluent [60 x 1.1 mL vials], 1 pack	J05AX07
		enfuvirtide	6455R	Fuzeon	enfuvirtide 90 mg injection [60 x 90 mg vials] (&) inert substance diluent [60 x 1.1 mL vials], 1 pack	J05AX07
	Genvoya	tenofovir + emtricitabine + elvitegravir + cobicistat	10680D	Genvoya	tenofovir alafenamide 10 mg + emtricitabine 200 mg + elvitegravir 150 mg + cobicistat 150 mg tablet, 30	J05AR18
		tenofovir alafenamide + emtricitabine + elvitegravir + cobicistat	11114Y	Genvoya	tenofovir alafenamide 10 mg + emtricitabine 200 mg + elvitegravir 150 mg + cobicistat 150 mg tablet, 30	J05AR18
	Invirase	saquinavir	10335Y	Invirase	saquinavir 500 mg tablet, 120	J05AE01
		saquinavir	6498B	Invirase	saquinavir 500 mg tablet, 120	J05AE01
		saquinavir	9545J	Invirase	saquinavir 500 mg tablet, 120	J05AE01
		saquinavir mesylate	6199G	Invirase	Capsule 200 mg (base)	J05AE01
	Isentress	raltegravir	10326L	Isentress	raltegravir 100 mg chewable tablet, 60	J05AX08
		raltegravir	2754Y	Isentress	raltegravir 100 mg tablet: chewable, 60	J05AX08
		raltegravir	2760G	Isentress	raltegravir 100 mg tablet: chewable, 60	J05AX08
		raltegravir	10299C	Isentress	raltegravir 25 mg chewable tablet, 60	J05AX08
		raltegravir	2736B	Isentress	raltegravir 25 mg tablet: chewable, 60	J05AX08
		raltegravir	2743J	Isentress	raltegravir 25 mg tablet: chewable, 60	J05AX08
		raltegravir	10286J	Isentress	raltegravir 400 mg tablet, 60	J05AX08
		raltegravir	9523F	Isentress	raltegravir 400 mg tablet, 60	J05AX08
		raltegravir	9629T	Isentress	raltegravir 400 mg tablet, 60	J05AX08
	Kaletra	lopinavir + ritonavir	10285H	Kaletra	lopinavir 100 mg + ritonavir 25 mg tablet, 60	J05AR10
		lopinavir + ritonavir	5790R	Kaletra	lopinavir 100 mg + ritonavir 25 mg tablet, 60	J05AR10
		lopinavir + ritonavir	9633B	Kaletra	lopinavir 100 mg + ritonavir 25 mg tablet, 60	J05AR10
		lopinavir + ritonavir	10272P	Kaletra	lopinavir 200 mg + ritonavir 50 mg tablet, 120	J05AR10
		lopinavir + ritonavir	5791T	Kaletra	lopinavir 200 mg + ritonavir 50 mg tablet, 120	J05AR10
		lopinavir + ritonavir	6495W	Kaletra	lopinavir 200 mg + ritonavir 50 mg tablet, 120	J05AR10
		lopinavir + ritonavir	10327M	Kaletra	lopinavir 400 mg/5 mL + ritonavir 100 mg/5 mL oral liquid, 60 mL	J05AR10
		lopinavir + ritonavir	5789Q	Kaletra	lopinavir 400 mg/5 mL + ritonavir 100 mg/5 mL oral liquid, 60 mL	J05AR10
		lopinavir + ritonavir	6341R	Kaletra	lopinavir 400 mg/5 mL + ritonavir 100 mg/5 mL oral liquid, 60 mL	J05AR10
		lopinavir with ritonavir	6340Q	Kaletra	Capsule 133.3 mg-33.3 mg	J05AR
	Kivexa	abacavir + lamivudine	10357D	Kivexa	abacavir 600 mg + lamivudine 300 mg tablet, 30	J05AR02
		abacavir + lamivudine	5603X	Kivexa	abacavir 600 mg + lamivudine 300 mg tablet, 30	J05AR02
		abacavir + lamivudine	6458X	Kivexa	abacavir 600 mg + lamivudine 300 mg tablet, 30	J05AR02
	Lamivudine	lamivudine	10320E	3TC	lamivudine 10 mg/mL oral liquid, 240 mL	J05AF05
		lamivudine	5773W	3TC	lamivudine 10 mg/mL oral liquid, 240 mL	J05AF05
		lamivudine	6194B	3TC	lamivudine 10 mg/mL oral liquid, 240 mL	J05AF05
		lamivudine	10315X	Zetlam	lamivudine 100 mg tablet, 28	J05AF05
		lamivudine	5770Q	Zetlam	lamivudine 100 mg tablet, 28	J05AF05
		lamivudine	6257H	Zetlam	lamivudine 100 mg tablet, 28	J05AF05
		lamivudine	10348P	Lamivudine Alphapharm	lamivudine 150 mg tablet, 60	J05AF05
		lamivudine	5772T	Lamivudine Alphapharm	lamivudine 150 mg tablet, 60	J05AF05
		lamivudine	6193Y	Lamivudine Alphapharm	lamivudine 150 mg tablet, 60	J05AF05
		lamivudine	10311Q	Lamivudine Alphapharm	lamivudine 300 mg tablet, 30	J05AF05
		lamivudine	5774X	Lamivudine Alphapharm	lamivudine 300 mg tablet, 30	J05AF05
		lamivudine	6435Q	Lamivudine Alphapharm	lamivudine 300 mg tablet, 30	J05AF05
		lamivudine	10338D	Zeffix	lamivudine 5 mg/mL oral liquid, 240 mL	J05AF05
		lamivudine	5771R	Zeffix	lamivudine 5 mg/mL oral liquid, 240 mL	J05AF05
		lamivudine	6271C	Zeffix	lamivudine 5 mg/mL oral liquid, 240 mL	J05AF05
	Nelfinavir	nelfinavir mesylate	6331F	Viracept	Tablet 250 mg (base)	J05AE04
	Odefsey	emtricitabine + rilpivirine + tenofovir alafenamide	11104K	Odefsey	emtricitabine 200 mg + rilpivirine 25 mg + tenofovir alafenamide 25 mg tablet, 30 tablets	J05AR
	Prezista	darunavir	5652L	Prezista	Tablet 300 mg (as ethanolate)	J05AE10
		darunavir	9616D	Prezista	Tablet 300 mg (as ethanolate)	J05AE10
		darunavir	10287K	Prezista	darunavir 150 mg tablet, 240	J05AE10
		darunavir	5653M	Prezista	darunavir 150 mg tablet, 240	J05AE10
		darunavir	9581G	Prezista	darunavir 150 mg tablet, 240	J05AE10
		darunavir	5821J	Prezista	darunavir 400 mg tablet, 60	J05AE10
		darunavir	5823L	Prezista	darunavir 400 mg tablet, 60	J05AE10
		darunavir	10329P	Prezista	darunavir 600 mg tablet, 60	J05AE10
		darunavir	3392M	Prezista	darunavir 600 mg tablet, 60	J05AE10
		darunavir	5000E	Prezista	darunavir 600 mg tablet, 60	J05AE10
		darunavir	10000H	Prezista	darunavir 800 mg tablet, 30	J05AE10
		darunavir	10367P	Prezista	darunavir 800 mg tablet, 30	J05AE10
		darunavir	2980W	Prezista	darunavir 800 mg tablet, 30	J05AE10
	Prezista/Cobicistat	darunavir + cobicistat	10903W	Prezcobix	darunavir 800 mg + cobicistat 150 mg tablet, 30	J05AR14
	Retrovir	zidovudine	10266H	Retrovir	zidovudine 100 mg capsule, 100	J05AF01
		zidovudine	6153W	Retrovir	zidovudine 100 mg capsule, 100	J05AF01
		zidovudine	9651Y	Retrovir	zidovudine 100 mg capsule, 100	J05AF01
		zidovudine	10360G	Retrovir	zidovudine 250 mg capsule, 40	J05AF01
		zidovudine	6154X	Retrovir	zidovudine 250 mg capsule, 40	J05AF01
		zidovudine	9652B	Retrovir	zidovudine 250 mg capsule, 40	J05AF01
		zidovudine	10361H	Retrovir	zidovudine 50 mg/5 mL oral liquid, 200 mL	J05AF01
		zidovudine	6155Y	Retrovir	zidovudine 50 mg/5 mL oral liquid, 200 mL	J05AF01
		zidovudine	9570Q	Retrovir	zidovudine 50 mg/5 mL oral liquid, 200 mL	J05AF01
	Reyataz	atazanavir	5615M	Reyataz	atazanavir 100 mg capsule, 60	J05AE08
		atazanavir	9646Q	Reyataz	atazanavir 100 mg capsule, 60	J05AE08
		atazanavir	10276W	Reyataz	atazanavir 150 mg capsule, 60	J05AE08
		atazanavir	5613K	Reyataz	atazanavir 150 mg capsule, 60	J05AE08
		atazanavir	6451M	Reyataz	atazanavir 150 mg capsule, 60	J05AE08
		atazanavir	10349Q	Reyataz	atazanavir 200 mg capsule, 60	J05AE08
		atazanavir	5614L	Reyataz	atazanavir 200 mg capsule, 60	J05AE08
		atazanavir	6452N	Reyataz	atazanavir 200 mg capsule, 60	J05AE08
		atazanavir	10321F	Reyataz	atazanavir 300 mg capsule, 30	J05AE08
		atazanavir	5612J	Reyataz	atazanavir 300 mg capsule, 30	J05AE08
		atazanavir	9614B	Reyataz	atazanavir 300 mg capsule, 30	J05AE08
	Reyataz/Cobicistat	atazanavir + cobicistat	10692R	Evotaz	atazanavir 300 mg + cobicistat 150 mg tablet, 30	J05AE
	Ritonavir	ritonavir	6203L	Norvir	Capsule 100 mg	J05AE03
		ritonavir	9543G	Norvir	Capsule 100 mg	J05AE03
		ritonavir	10273Q	Norvir	ritonavir 100 mg tablet, 30	J05AE03
		ritonavir	9660K	Norvir	ritonavir 100 mg tablet, 30	J05AE03
		ritonavir	9677H	Norvir	ritonavir 100 mg tablet, 30	J05AE03
		ritonavir	10300D	Norvir	ritonavir 600 mg/7.5 mL oral liquid, 90 mL	J05AE03
		ritonavir	6494T	Norvir	ritonavir 600 mg/7.5 mL oral liquid, 90 mL	J05AE03
		ritonavir	9542F	Norvir	ritonavir 600 mg/7.5 mL oral liquid, 90 mL	J05AE03
	Stocrin	efavirenz	6283Q	Stocrin	Capsule 200 mg	J05AG03
		efavirenz	10336B	Stocrin	efavirenz 200 mg tablet, 90	J05AG03
		efavirenz	5708K	Stocrin	efavirenz 200 mg tablet, 90	J05AG03
		efavirenz	9618F	Stocrin	efavirenz 200 mg tablet, 90	J05AG03
		efavirenz	10275T	Stocrin	efavirenz 30 mg/mL oral liquid, 180 mL	J05AG03
		efavirenz	5707J	Stocrin	efavirenz 30 mg/mL oral liquid, 180 mL	J05AG03
		efavirenz	6372J	Stocrin	efavirenz 30 mg/mL oral liquid, 180 mL	J05AG03
		efavirenz	10366N	Stocrin	efavirenz 600 mg tablet, 30	J05AG03
		efavirenz	5706H	Stocrin	efavirenz 600 mg tablet, 30	J05AG03
		efavirenz	6356M	Stocrin	efavirenz 600 mg tablet, 30	J05AG03
	Stribild	tenofovir + emtricitabine + elvitegravir + cobicistat	10085T	Stribild	tenofovir disoproxil fumarate 300 mg + emtricitabine 200 mg + elvitegravir 150 mg + cobicistat 150 mg tablet, 30	J05AR09
		tenofovir + emtricitabine + elvitegravir + cobicistat	10088Y	Stribild	tenofovir disoproxil fumarate 300 mg + emtricitabine 200 mg + elvitegravir 150 mg + cobicistat 150 mg tablet, 30	J05AR09
		tenofovir + emtricitabine + elvitegravir + cobicistat	10307L	Stribild	tenofovir disoproxil fumarate 300 mg + emtricitabine 200 mg + elvitegravir 150 mg + cobicistat 150 mg tablet, 30	J05AR09
	Telzir	fosamprenavir	10368Q	Telzir	fosamprenavir 50 mg/mL oral liquid, 225 mL	J05AE07
		fosamprenavir	5745J	Telzir	fosamprenavir 50 mg/mL oral liquid, 225 mL	J05AE07
		fosamprenavir	6454Q	Telzir	fosamprenavir 50 mg/mL oral liquid, 225 mL	J05AE07
		fosamprenavir	10337C	Telzir	fosamprenavir 700 mg tablet, 60	J05AE07
		fosamprenavir	5746K	Telzir	fosamprenavir 700 mg tablet, 60	J05AE07
		fosamprenavir	6453P	Telzir	fosamprenavir 700 mg tablet, 60	J05AE07
	Tenofovir (Viread)	tenofovir	10310P	Viread	tenofovir disoproxil fumarate 300 mg tablet, 30	J05AF07
		tenofovir	6358P	Viread	tenofovir disoproxil fumarate 300 mg tablet, 30	J05AF07
		tenofovir	9563H	Viread	tenofovir disoproxil fumarate 300 mg tablet, 30	J05AF07
	Triumeq	dolutegravir + abacavir + lamivudine	10247H	Triumeq	dolutegravir 50 mg + abacavir 600 mg + lamivudine 300 mg tablet, 30	J05AR
		dolutegravir + abacavir + lamivudine	10248J	Triumeq	dolutegravir 50 mg + abacavir 600 mg + lamivudine 300 mg tablet, 30	J05AR
		dolutegravir + abacavir + lamivudine	10345L	Triumeq	dolutegravir 50 mg + abacavir 600 mg + lamivudine 300 mg tablet, 30	J05AR13
	Trizivir	abacavir + lamivudine + zidovudine	10305J	Trizivir	abacavir 300 mg + lamivudine 150 mg + zidovudine 300 mg tablet, 60	J05AR04
		abacavir + lamivudine + zidovudine	5604Y	Trizivir	abacavir 300 mg + lamivudine 150 mg + zidovudine 300 mg tablet, 60	J05AR04
		abacavir + lamivudine + zidovudine	6327B	Trizivir	abacavir 300 mg + lamivudine 150 mg + zidovudine 300 mg tablet, 60	J05AR04
	Truvada	tenofovir + emtricitabine	10347N	Truvada	tenofovir disoproxil fumarate 300 mg + emtricitabine 200 mg tablet, 30	J05AR03
		tenofovir + emtricitabine	6468K	Truvada	tenofovir disoproxil fumarate 300 mg + emtricitabine 200 mg tablet, 30	J05AR03
		tenofovir + emtricitabine	9564J	Truvada	tenofovir disoproxil fumarate 300 mg + emtricitabine 200 mg tablet, 30	J05AR03
	Viedex	didanosine	5663C	Videx EC	didanosine 125 mg capsule: enteric, 30	J05AF02
		didanosine	6298L	Videx EC	didanosine 125 mg capsule: enteric, 30	J05AF02
		didanosine	10350R	Videx EC	didanosine 125 mg enteric capsule, 30	J05AF02
		didanosine	5664D	Videx EC	didanosine 200 mg capsule: enteric, 30	J05AF02
		didanosine	6299M	Videx EC	didanosine 200 mg capsule: enteric, 30	J05AF02
		didanosine	10351T	Videx EC	didanosine 200 mg enteric capsule, 30	J05AF02
		didanosine	5665E	Videx EC	didanosine 250 mg capsule: enteric, 30	J05AF02
		didanosine	6300N	Videx EC	didanosine 250 mg capsule: enteric, 30	J05AF02
		didanosine	10364L	Videx EC	didanosine 250 mg enteric capsule, 30	J05AF02
		didanosine	5666F	Videx EC	didanosine 400 mg capsule: enteric, 30	J05AF02
		didanosine	6301P	Videx EC	didanosine 400 mg capsule: enteric, 30	J05AF02
		didanosine	10313T	Videx EC	didanosine 400 mg enteric capsule, 30	J05AF02
	Viramune	nevirapine	10319D	Viramune	nevirapine 10 mg/mL oral liquid, 240 mL	J05AG01
		nevirapine	9507J	Viramune	nevirapine 10 mg/mL oral liquid, 240 mL	J05AG01
		nevirapine	9571R	Viramune	nevirapine 10 mg/mL oral liquid, 240 mL	J05AG01
		nevirapine	10304H	Nevirapine Alphapharm	nevirapine 200 mg tablet, 60	J05AG01
		nevirapine	6215D	Nevirapine Alphapharm	nevirapine 200 mg tablet, 60	J05AG01
		nevirapine	9506H	Nevirapine Alphapharm	nevirapine 200 mg tablet, 60	J05AG01
		nevirapine	10303G	Viramune XR	nevirapine 400 mg modified release tablet, 30	J05AG01
		nevirapine	1129K	Viramune XR	nevirapine 400 mg tablet: modified release, 30 tablets	J05AG01
		nevirapine	1132N	Viramune XR	nevirapine 400 mg tablet: modified release, 30 tablets	J05AG01
	Zerit	stavudine	6250Y	Zerit	Powder for oral solution 1 mg per mL, 200 mL	J05AF04
		stavudine	9552R	Zerit	Powder for oral solution 1 mg per mL, 200 mL	J05AF04
		stavudine	10325K	Zerit	stavudine 20 mg capsule, 60	J05AF04
		stavudine	6186N	Zerit	stavudine 20 mg capsule, 60	J05AF04
		stavudine	9553T	Zerit	stavudine 20 mg capsule, 60	J05AF04
		stavudine	10271N	Zerit	stavudine 30 mg capsule, 60	J05AF04
		stavudine	6189R	Zerit	stavudine 30 mg capsule, 60	J05AF04
		stavudine	9554W	Zerit	stavudine 30 mg capsule, 60	J05AF04
		stavudine	10312R	Zerit	stavudine 40 mg capsule, 60	J05AF04
		stavudine	6190T	Zerit	stavudine 40 mg capsule, 60	J05AF04
		stavudine	9556Y	Zerit	stavudine 40 mg capsule, 60	J05AF04
	Ziagen	abacavir	10356C	Ziagen	abacavir 20 mg/mL oral liquid, 240 mL	J05AF06
		abacavir	5602W	Ziagen	abacavir 20 mg/mL oral liquid, 240 mL	J05AF06
		abacavir	6265R	Ziagen	abacavir 20 mg/mL oral liquid, 240 mL	J05AF06
		abacavir	10294T	Ziagen	abacavir 300 mg tablet, 60	J05AF06
		abacavir	5601T	Ziagen	abacavir 300 mg tablet, 60	J05AF06
		abacavir	6264Q	Ziagen	abacavir 300 mg tablet, 60	J05AF06

## Sheet: Mental Health
	Mental Health
	About:
	Schizophrenia, Bipolar, Anxiety and Depression
	Drug Group	Drug	Drug Code	Brands	Form and Strength	ATC Code
	Mental health disorder	alprazolam	2132F	Kalma 1	alprazolam 1 mg tablet, 50	N05BA12
		alprazolam	8118G	Kalma 2	alprazolam 2 mg tablet, 50	N05BA12
		alprazolam	2130D	Kalma 0.25	alprazolam 250 microgram tablet, 50	N05BA12
		alprazolam	2131E	Kalma 0.5	alprazolam 500 microgram tablet, 50	N05BA12
		amisulpride	8594H	Sulprix	amisulpride 100 mg tablet, 30	N05AL05
		amisulpride	8736T	Solian Solution	amisulpride 100 mg/mL oral liquid, 60 mL	N05AL05
		amisulpride	8595J	Sulprix	amisulpride 200 mg tablet, 60	N05AL05
		amisulpride	8596K	Sulprix	amisulpride 400 mg tablet, 60	N05AL05
		amitriptyline	2417F	Endep 10	amitriptyline hydrochloride 10 mg tablet, 50	N06AA09
		amitriptyline	2418G	Endep 25	amitriptyline hydrochloride 25 mg tablet, 50	N06AA09
		amitriptyline	2429W	Endep 50	amitriptyline hydrochloride 50 mg tablet, 50	N06AA09
		aripiprazole	8717T	Abyraz	aripiprazole 10 mg tablet, 30	N05AX12
		aripiprazole	8718W	Abyraz	aripiprazole 15 mg tablet, 30	N05AX12
		aripiprazole	8719X	Abyraz	aripiprazole 20 mg tablet, 30	N05AX12
		aripiprazole	8720Y	Abyraz	aripiprazole 30 mg tablet, 30	N05AX12
		aripiprazole	10224D	Abilify Maintena	aripiprazole 300 mg injection: modified release [1 x 300 mg vial] (&) inert substance diluent [1 vial], 1 pack	N05AX12
		aripiprazole	10219W	Abilify Maintena	aripiprazole 400 mg injection: modified release [1 x 400 mg vial] (&) inert substance diluent [1 vial], 1 pack	N05AX12
		asenapine	5141N	Saphris	asenapine 10 mg sublingual wafer, 60	N05AH05
		asenapine	5140M	Saphris	asenapine 5 mg sublingual wafer, 60	N05AH05
		buspirone	4145E	Buspar	buspirone hydrochloride 10 mg tablet, 50	N05BE01
		buspirone	4144D	Buspar	buspirone hydrochloride 5 mg tablet, 50	N05BE01
		chlorpromazine	1196Y	Largactil	chlorpromazine hydrochloride 10 mg tablet, 100	N05AA01
		chlorpromazine	1199D	Largactil	chlorpromazine hydrochloride 100 mg tablet, 100	N05AA01
		chlorpromazine	1197B	Largactil	chlorpromazine hydrochloride 25 mg tablet, 100	N05AA01
		chlorpromazine	1201F	Largactil	chlorpromazine hydrochloride 5 mg/mL oral liquid, 100 mL	N05AA01
		chlorpromazine	1195X	Largactil	chlorpromazine hydrochloride 50 mg/2 mL injection, 10 x 2 mL ampoules	N05AA01
		chlorpromazine	3455W	Largactil	chlorpromazine hydrochloride 50 mg/2 mL injection, 10 x 2 mL ampoules	N05AA01
		citalopram	8702B	Celapram	citalopram 10 mg tablet, 28	N06AB04
		citalopram	8220P	Celapram	citalopram 20 mg tablet, 28	N06AB04
		citalopram	8703C	Celapram	citalopram 40 mg tablet, 28	N06AB04
		clomipramine	1561E	Placil	clomipramine hydrochloride 25 mg tablet, 50	N06AA04
		clozapine	10358E	Clozaril 100	clozapine 100 mg tablet, 100	N05AH02
		clozapine	5629G	Clozaril 100	clozapine 100 mg tablet, 100	N05AH02
		clozapine	6102E	Clozaril 100	clozapine 100 mg tablet, 100	N05AH02
		clozapine	10288L	Clopine 200	clozapine 200 mg tablet, 100	N05AH02
		clozapine	5627E	Clopine 200	clozapine 200 mg tablet, 100	N05AH02
		clozapine	6418T	Clopine 200	clozapine 200 mg tablet, 100	N05AH02
		clozapine	10289M	Clozaril 25	clozapine 25 mg tablet, 100	N05AH02
		clozapine	5628F	Clozaril 25	clozapine 25 mg tablet, 100	N05AH02
		clozapine	6101D	Clozaril 25	clozapine 25 mg tablet, 100	N05AH02
		clozapine	10302F	Clopine 50	clozapine 50 mg tablet, 100	N05AH02
		clozapine	5626D	Clopine 50	clozapine 50 mg tablet, 100	N05AH02
		clozapine	6417R	Clopine 50	clozapine 50 mg tablet, 100	N05AH02
		clozapine	10341G	Clopine Suspension	clozapine 50 mg/mL oral liquid, 100 mL	N05AH02
		clozapine	5630H	Clopine Suspension	clozapine 50 mg/mL oral liquid, 100 mL	N05AH02
		clozapine	9632Y	Clopine Suspension	clozapine 50 mg/mL oral liquid, 100 mL	N05AH02
		desvenlafaxine	10231L	Desfax	desvenlafaxine 100 mg modified release tablet, 28	N06AX23
		desvenlafaxine	10245F	Desvenlafaxine GH XR	desvenlafaxine 100 mg modified release tablet, 28	N06AX23
		desvenlafaxine	9367B	Pristiq	desvenlafaxine 100 mg modified release tablet, 28	N06AX23
		desvenlafaxine	10234P	Desvenlafaxine GH XR	desvenlafaxine 50 mg modified release tablet, 28	N06AX23
		desvenlafaxine	10241B	Desfax	desvenlafaxine 50 mg modified release tablet, 28	N06AX23
		desvenlafaxine	9366Y	Pristiq	desvenlafaxine 50 mg modified release tablet, 28	N06AX23
		diazepam	2669L	Diazepam Elixir	diazepam 1 mg/mL oral liquid, 100 mL	N05BA01
		diazepam	2558P	Hospira Pty Limited	diazepam 10 mg/2 mL injection, 5 x 2 mL ampoules	N05BA01
		diazepam	3458B	Hospira Pty Limited	diazepam 10 mg/2 mL injection, 5 x 2 mL ampoules	N05BA01
		diazepam	5073B	Hospira Pty Limited	diazepam 10 mg/2 mL injection, 5 x 2 mL ampoules	N05BA01
		diazepam	3161J	Antenex 2	diazepam 2 mg tablet, 50	N05BA01
		diazepam	5071X	Antenex 2	diazepam 2 mg tablet, 50	N05BA01
		diazepam	5355W	Antenex 2	diazepam 2 mg tablet, 50	N05BA01
		diazepam	5357Y	Antenex 2	diazepam 2 mg tablet, 50	N05BA01
		diazepam	3162K	Antenex 5	diazepam 5 mg tablet, 50	N05BA01
		diazepam	5072Y	Antenex 5	diazepam 5 mg tablet, 50	N05BA01
		diazepam	5356X	Antenex 5	diazepam 5 mg tablet, 50	N05BA01
		diazepam	5358B	Antenex 5	diazepam 5 mg tablet, 50	N05BA01
		dothiepin	1357K	Dothep 25	dothiepin hydrochloride 25 mg capsule, 50	N06AA16
		dothiepin	1358L	Dothep 75	dothiepin hydrochloride 75 mg tablet, 30	N06AA16
		doxepin	1011F	Deptran 10	doxepin 10 mg capsule, 50	N06AA12
		doxepin	1013H	Deptran 25	doxepin 25 mg capsule, 50	N06AA12
		doxepin	1012G	Deptran 50	doxepin 50 mg tablet, 50	N06AA12
		duloxetine	9155W	Tixol	duloxetine 30 mg enteric capsule, 28	N06AX21
		duloxetine	9156X	Tixol	duloxetine 60 mg enteric capsule, 28	N06AX21
		escitalopram	8700X	LoxaLate	escitalopram 10 mg tablet, 28	N06AB10
		escitalopram	9432K	Esipram	escitalopram 10 mg tablet, 28	N06AB10
		escitalopram	8849R	Lexapro	escitalopram 10 mg/mL oral liquid, 28 mL	N06AB10
		escitalopram	8701Y	LoxaLate	escitalopram 20 mg tablet, 28	N06AB10
		escitalopram	9433L	Esipram	escitalopram 20 mg tablet, 28	N06AB10
		escitalopram	10181W	Lexapro	escitalopram 20 mg/mL oral liquid, 15 mL	N06AB10
		escitalopram oxalate	9700M	Lexapro	Oral solution 10 mg (base) per mL, 28 mL	N06AB10
		fluoxetine	1434L	Zactin	fluoxetine 20 mg capsule, 28	N06AB03
		fluoxetine	8270G	Zactin Tablet	fluoxetine 20 mg dispersible tablet, 28	N06AB03
		flupenthixol decanoate	2256R	Fluanxol Depot	Oily I.M. injection 40 mg in 2 mL	N05AF01
		flupenthixol decanoate	2257T	Fluanxol Concentrated Depot	flupenthixol decanoate 100 mg/mL injection, 5 x 1 mL ampoules	N05AF01
		flupenthixol decanoate	2255Q	Fluanxol Depot	flupenthixol decanoate 20 mg/mL injection, 5 x 1 mL ampoules	N05AF01
		fluphenazine decanoate	1046C	Modecate	fluphenazine decanoate 12.5 mg/0.5 mL injection, 5 x 0.5 mL ampoules	N05AB02
		fluphenazine decanoate	3098C	Modecate	fluphenazine decanoate 25 mg/mL injection, 5 x 1 mL ampoules	N05AB02
		fluphenazine decanoate	1001Q	Modecate	fluphenazine decanoate 50 mg/2 mL injection, 5 x 2 mL ampoules	N05AB02
		fluvoxamine	8174F	Movox 100	fluvoxamine maleate 100 mg tablet, 30	N06AB08
		fluvoxamine	8512B	Movox 50	fluvoxamine maleate 50 mg tablet, 30	N06AB08
		haloperidol	2767P	Serenace	haloperidol 1.5 mg tablet, 100	N05AD01
		haloperidol	2763K	Serenace	haloperidol 2 mg/mL oral liquid, 100 mL	N05AD01
		haloperidol	2770T	Serenace	haloperidol 5 mg tablet, 50	N05AD01
		haloperidol	2768Q	Serenace	haloperidol 5 mg/mL injection, 10 x 1 mL ampoules	N05AD01
		haloperidol	3456X	Serenace	haloperidol 5 mg/mL injection, 10 x 1 mL ampoules	N05AD01
		haloperidol	2761H	Serenace	haloperidol 500 microgram tablet, 100	N05AD01
		haloperidol decanoate	2766N	Haldol decanoate	haloperidol (as decanoate) 150 mg/3 mL injection, 5 x 3 mL ampoules	N05AD01
		haloperidol decanoate	2765M	Haldol decanoate	haloperidol (as decanoate) 50 mg/mL injection, 5 x 1 mL vials	N05AD01
		imipramine	2420J	Tofranil 10	imipramine hydrochloride 10 mg tablet, 50	N06AA02
		imipramine	2421K	Tofranil 25	imipramine hydrochloride 25 mg tablet, 50	N06AA02
		lithium carbonate	3059B	Lithicarb	lithium carbonate 250 mg tablet, 200	N06AX
		lithium carbonate	8290H	Quilonum SR	lithium carbonate 450 mg modified release tablet, 100	N06AX
		lurasidone	10526B	Latuda	lurasidone hydrochloride 40 mg tablet, 30	N05AE05
		lurasidone	10529E	Latuda	lurasidone hydrochloride 80 mg tablet, 30	N05AE05
		mianserin	1627P	Lumin 10	mianserin hydrochloride 10 mg tablet, 50	N06AX03
		mianserin	1628Q	Lumin 20	mianserin hydrochloride 20 mg tablet, 50	N06AX03
		mirtazapine	8855C	Remeron SolTab	MIRTAZAPINE Tablet 15 mg (orally disintegrating), 30	N06AX11
		mirtazapine	8856D	Remeron SolTab	MIRTAZAPINE Tablet 30 mg (orally disintegrating), 30	N06AX11
		mirtazapine	8857E	Remeron SolTab	MIRTAZAPINE Tablet 45 mg (orally disintegrating), 30	N06AX11
		mirtazapine	9365X	Axit 15	mirtazapine 15 mg tablet, 30	N06AX11
		mirtazapine	8513C	Axit 30	mirtazapine 30 mg tablet, 30	N06AX11
		mirtazapine	8883M	Axit 45	mirtazapine 45 mg tablet, 30	N06AX11
		moclobemide	1900B	Amira 150	moclobemide 150 mg tablet, 60	N06AG02
		moclobemide	8003F	Amira 300	moclobemide 300 mg tablet, 60	N06AG02
		nortriptyline	2522R	NortriTABS 10 mg	nortriptyline 10 mg tablet, 50	N06AA10
		nortriptyline	2523T	NortriTABS 25 mg	nortriptyline 25 mg tablet, 50	N06AA10
		olanzapine	3382B	Ozin ODT 10	OLANZAPINE Tablet 10 mg (orally disintegrating), 28	N05AH03
		olanzapine	3381Y	Ozin ODT 5	OLANZAPINE Tablet 5 mg (orally disintegrating), 28	N05AH03
		olanzapine	1042W	Olanzapine generichealth 10	olanzapine 10 mg tablet, 28	N05AH03
		olanzapine	8187X	Zypine	olanzapine 10 mg tablet, 28	N05AH03
		olanzapine	8434X	Zypine ODT	olanzapine 10 mg wafer, 28	N05AH03
		olanzapine	3384D	Ozin ODT 15	olanzapine 15 mg tablet, 28	N05AH03
		olanzapine	8952E	Zypine ODT	olanzapine 15 mg wafer, 28	N05AH03
		olanzapine	1024X	Olanzapine generichealth 2.5	olanzapine 2.5 mg tablet, 28	N05AH03
		olanzapine	8170B	Zypine	olanzapine 2.5 mg tablet, 28	N05AH03
		olanzapine	3385E	Ozin ODT 20	olanzapine 20 mg tablet, 28	N05AH03
		olanzapine	8953F	Zypine ODT	olanzapine 20 mg wafer, 28	N05AH03
		olanzapine	9294E	Zyprexa Relprevv	olanzapine 210 mg modified release injection [1 vial] (&) inert substance diluent [3 mL vial], 1 pack	N05AH03
		olanzapine	9295F	Zyprexa Relprevv	olanzapine 300 mg modified release injection [1 vial] (&) inert substance diluent [3 mL vial], 1 pack	N05AH03
		olanzapine	9303P	Zyprexa Relprevv	olanzapine 405 mg modified release injection [1 vial] (&) inert substance diluent [3 mL vial], 1 pack	N05AH03
		olanzapine	1037N	Olanzapine generichealth 5	olanzapine 5 mg tablet, 28	N05AH03
		olanzapine	8185T	Zypine	olanzapine 5 mg tablet, 28	N05AH03
		olanzapine	8433W	Zypine ODT	olanzapine 5 mg wafer, 28	N05AH03
		olanzapine	1041T	Olanzapine generichealth 7.5	olanzapine 7.5 mg tablet, 28	N05AH03
		olanzapine	8186W	Zypine	olanzapine 7.5 mg tablet, 28	N05AH03
		oxazepam	3132W	Alepam 15	oxazepam 15 mg tablet, 25	N05BA04
		oxazepam	3134Y	Alepam 15	oxazepam 15 mg tablet, 25	N05BA04
		oxazepam	5192G	Alepam 15	oxazepam 15 mg tablet, 25	N05BA04
		oxazepam	5371Q	Alepam 15	oxazepam 15 mg tablet, 25	N05BA04
		oxazepam	5373T	Alepam 15	oxazepam 15 mg tablet, 25	N05BA04
		oxazepam	3133X	Alepam 30	oxazepam 30 mg tablet, 25	N05BA04
		oxazepam	3135B	Alepam 30	oxazepam 30 mg tablet, 25	N05BA04
		oxazepam	5193H	Alepam 30	oxazepam 30 mg tablet, 25	N05BA04
		oxazepam	5372R	Alepam 30	oxazepam 30 mg tablet, 25	N05BA04
		oxazepam	5374W	Alepam 30	oxazepam 30 mg tablet, 25	N05BA04
		paliperidone	9194X	Invega	Tablet 12 mg (prolonged release)	N05AX13
		paliperidone	5107T	Invega Sustenna	paliperidone 100 mg modified release injection, 1 syringe	N05AX13
		paliperidone	5109X	Invega Sustenna	paliperidone 150 mg modified release injection, 1 syringe	N05AX13
		paliperidone	11085K	Invega Trinza	paliperidone 175 mg/0.875 mL modified release injection, 0.875 mL syringe	N05AX13
		paliperidone	5100K	Invega Sustenna	paliperidone 25 mg modified release injection, 1 syringe	N05AX13
		paliperidone	11072R	Invega Trinza	paliperidone 263 mg/1.315 mL modified release injection, 1.315 mL syringe	N05AX13
		paliperidone	9140C	Invega	paliperidone 3 mg modified release tablet, 28	N05AX13
		paliperidone	11094X	Invega Trinza	paliperidone 350 mg/1.75 mL modified release injection, 1.75 mL syringe	N05AX13
		paliperidone	5102M	Invega Sustenna	paliperidone 50 mg modified release injection, 1 syringe	N05AX13
		paliperidone	11066K	Invega Trinza	paliperidone 525 mg/2.625 mL modified release injection, 2.625 mL syringe	N05AX13
		paliperidone	9141D	Invega	paliperidone 6 mg modified release tablet, 28	N05AX13
		paliperidone	5103N	Invega Sustenna	paliperidone 75 mg modified release injection, 1 syringe	N05AX13
		paliperidone	9142E	Invega	paliperidone 9 mg modified release tablet, 28	N05AX13
		paroxetine	2242B	Paxtine	paroxetine 20 mg tablet, 30	N06AB05
		paroxetine	9197C	Paroxetine generichealth	paroxetine 20 mg tablet, 30	N06AB05
		pericyazine	3053Q	Neulactil	pericyazine 10 mg tablet, 100	N05AC01
		pericyazine	3052P	Neulactil	pericyazine 2.5 mg tablet, 100	N05AC01
		phenelzine	2856H	Nardil	phenelzine 15 mg tablet, 100	N06AF03
		quetiapine	8457D	Syquet	quetiapine 100 mg tablet, 90	N05AH04
		quetiapine	5458G	Seroquel XR	quetiapine 150 mg modified release tablet, 60	N05AH04
		quetiapine	9203J	Seroquel XR	quetiapine 200 mg modified release tablet, 60	N05AH04
		quetiapine	8458E	Syquet	quetiapine 200 mg tablet, 60	N05AH04
		quetiapine	8456C	Syquet	quetiapine 25 mg tablet, 60	N05AH04
		quetiapine	9204K	Seroquel XR	quetiapine 300 mg modified release tablet, 60	N05AH04
		quetiapine	8580N	Syquet	quetiapine 300 mg tablet, 60	N05AH04
		quetiapine	9205L	Seroquel XR	quetiapine 400 mg modified release tablet, 60	N05AH04
		quetiapine	9202H	Seroquel XR	quetiapine 50 mg modified release tablet, 60	N05AH04
		reboxetine	8583R	Edronax	reboxetine 4 mg tablet, 60	N06AX18
		risperidone	8791Q	Risperdal	Oral solution 1 mg per mL, 30 mL	N05AX08
		risperidone	3169T	Rixadone	risperidone 1 mg tablet, 60	N05AX08
		risperidone	8789N	Rixadone	risperidone 1 mg tablet, 60	N05AX08
		risperidone	8790P	Risperdal Quicklet	risperidone 1 mg tablet: orally disintegrating, 28	N05AX08
		risperidone	8792R	Risperdal Quicklet	risperidone 1 mg tablet: orally disintegrating, 28	N05AX08
		risperidone	8100H	Risperdal	risperidone 1 mg/mL oral liquid, 100 mL	N05AX08
		risperidone	9293D	Risperdal	risperidone 1 mg/mL oral liquid, 100 mL	N05AX08
		risperidone	3170W	Rixadone	risperidone 2 mg tablet, 60	N05AX08
		risperidone	9079W	Rixadone	risperidone 2 mg tablet, 60	N05AX08
		risperidone	8794W	Risperdal Quicklet	risperidone 2 mg tablet: orally disintegrating, 28	N05AX08
		risperidone	9080X	Risperdal Quicklet	risperidone 2 mg tablet: orally disintegrating, 28	N05AX08
		risperidone	8780D	Risperdal Consta	risperidone 25 mg modified release injection [1 vial] (&) inert substance diluent [2 mL syringe], 1 pack	N05AX08
		risperidone	3171X	Rixadone	risperidone 3 mg tablet, 60	N05AX08
		risperidone	9075P	Risperdal Quicklet	risperidone 3 mg tablet: orally disintegrating, 28	N05AX08
		risperidone	8781E	Risperdal Consta	risperidone 37.5 mg modified release injection [1 vial] (&) inert substance diluent [2 mL syringe], 1 pack	N05AX08
		risperidone	3172Y	Rixadone	risperidone 4 mg tablet, 60	N05AX08
		risperidone	9076Q	Risperdal Quicklet	risperidone 4 mg tablet: orally disintegrating, 28	N05AX08
		risperidone	8782F	Risperdal Consta	risperidone 50 mg modified release injection [1 vial] (&) inert substance diluent [2 mL syringe], 1 pack	N05AX08
		risperidone	1842Y	Risperdal	risperidone 500 microgram tablet, 20	N05AX08
		risperidone	1846E	Risperdal	risperidone 500 microgram tablet, 20	N05AX08
		risperidone	8787L	Rixadone	risperidone 500 microgram tablet, 60	N05AX08
		risperidone	8869T	Rixadone	risperidone 500 microgram tablet, 60	N05AX08
		risperidone	8788M	Risperdal Quicklet	risperidone 500 microgram tablet: orally disintegrating, 28	N05AX08
		risperidone	8870W	Risperdal Quicklet	risperidone 500 microgram tablet: orally disintegrating, 28	N05AX08
		sertraline	2237R	Eleva 100	sertraline 100 mg tablet, 30	N06AB06
		sertraline	8837D	Eleva 100	sertraline 100 mg tablet, 30	N06AB06
		sertraline	2236Q	Eleva 50	sertraline 50 mg tablet, 30	N06AB06
		sertraline	8836C	Eleva 50	sertraline 50 mg tablet, 30	N06AB06
		tranylcypromine	2444P	Parnate	tranylcypromine 10 mg tablet, 50	N06AF04
		trifluoperazine	2185B	Stelazine	trifluoperazine 1 mg tablet, 100	N05AB06
		trifluoperazine	2386N	Stelazine	trifluoperazine 2 mg tablet, 100	N05AB06
		trifluoperazine	2186C	Stelazine	trifluoperazine 5 mg tablet, 100	N05AB06
		venlafaxine	8302Y	Enlafax-XR	venlafaxine 150 mg modified release capsule, 28	N06AX16
		venlafaxine	8868R	Venlafaxine AN SR	venlafaxine 37.5 mg modified release capsule, 28	N06AX16
		venlafaxine	8301X	Enlafax-XR	venlafaxine 75 mg modified release capsule, 28	N06AX16
		ziprasidone	9070J	Zeldox	ziprasidone 20 mg capsule, 60	N05AE04
		ziprasidone	9071K	Zeldox	ziprasidone 40 mg capsule, 60	N05AE04
		ziprasidone	9072L	Zeldox	ziprasidone 60 mg capsule, 60	N05AE04
		ziprasidone	9073M	Zeldox	ziprasidone 80 mg capsule, 60	N05AE04
		zuclopenthixol decanoate	8097E	Clopixol Depot	zuclopenthixol decanoate 200 mg/mL injection, 5 x 1 mL ampoules	N05AF05
	Drugs for Schiz or Bipolar	aripiprazole	8717T	Abyraz	aripiprazole 10 mg tablet, 30	N05AX12
		aripiprazole	8718W	Abyraz	aripiprazole 15 mg tablet, 30	N05AX12
		aripiprazole	8719X	Abyraz	aripiprazole 20 mg tablet, 30	N05AX12
		aripiprazole	8720Y	Abyraz	aripiprazole 30 mg tablet, 30	N05AX12
		aripiprazole	10224D	Abilify Maintena	aripiprazole 300 mg injection: modified release [1 x 300 mg vial] (&) inert substance diluent [1 vial], 1 pack	N05AX12
		aripiprazole	10219W	Abilify Maintena	aripiprazole 400 mg injection: modified release [1 x 400 mg vial] (&) inert substance diluent [1 vial], 1 pack	N05AX12
		asenapine	5141N	Saphris	asenapine 10 mg sublingual wafer, 60	N05AH05
		asenapine	5140M	Saphris	asenapine 5 mg sublingual wafer, 60	N05AH05
		haloperidol	2767P	Serenace	haloperidol 1.5 mg tablet, 100	N05AD01
		haloperidol	2763K	Serenace	haloperidol 2 mg/mL oral liquid, 100 mL	N05AD01
		haloperidol	2770T	Serenace	haloperidol 5 mg tablet, 50	N05AD01
		haloperidol	2768Q	Serenace	haloperidol 5 mg/mL injection, 10 x 1 mL ampoules	N05AD01
		haloperidol	3456X	Serenace	haloperidol 5 mg/mL injection, 10 x 1 mL ampoules	N05AD01
		haloperidol	2761H	Serenace	haloperidol 500 microgram tablet, 100	N05AD01
		haloperidol decanoate	2766N	Haldol decanoate	haloperidol (as decanoate) 150 mg/3 mL injection, 5 x 3 mL ampoules	N05AD01
		haloperidol decanoate	2765M	Haldol decanoate	haloperidol (as decanoate) 50 mg/mL injection, 5 x 1 mL vials	N05AD01
		olanzapine	3382B	Ozin ODT 10	OLANZAPINE Tablet 10 mg (orally disintegrating), 28	N05AH03
		olanzapine	3381Y	Ozin ODT 5	OLANZAPINE Tablet 5 mg (orally disintegrating), 28	N05AH03
		olanzapine	1042W	Olanzapine generichealth 10	olanzapine 10 mg tablet, 28	N05AH03
		olanzapine	8187X	Zypine	olanzapine 10 mg tablet, 28	N05AH03
		olanzapine	8434X	Zypine ODT	olanzapine 10 mg wafer, 28	N05AH03
		olanzapine	3384D	Ozin ODT 15	olanzapine 15 mg tablet, 28	N05AH03
		olanzapine	8952E	Zypine ODT	olanzapine 15 mg wafer, 28	N05AH03
		olanzapine	1024X	Olanzapine generichealth 2.5	olanzapine 2.5 mg tablet, 28	N05AH03
		olanzapine	8170B	Zypine	olanzapine 2.5 mg tablet, 28	N05AH03
		olanzapine	3385E	Ozin ODT 20	olanzapine 20 mg tablet, 28	N05AH03
		olanzapine	8953F	Zypine ODT	olanzapine 20 mg wafer, 28	N05AH03
		olanzapine	9294E	Zyprexa Relprevv	olanzapine 210 mg modified release injection [1 vial] (&) inert substance diluent [3 mL vial], 1 pack	N05AH03
		olanzapine	9295F	Zyprexa Relprevv	olanzapine 300 mg modified release injection [1 vial] (&) inert substance diluent [3 mL vial], 1 pack	N05AH03
		olanzapine	9303P	Zyprexa Relprevv	olanzapine 405 mg modified release injection [1 vial] (&) inert substance diluent [3 mL vial], 1 pack	N05AH03
		olanzapine	1037N	Olanzapine generichealth 5	olanzapine 5 mg tablet, 28	N05AH03
		olanzapine	8185T	Zypine	olanzapine 5 mg tablet, 28	N05AH03
		olanzapine	8433W	Zypine ODT	olanzapine 5 mg wafer, 28	N05AH03
		olanzapine	1041T	Olanzapine generichealth 7.5	olanzapine 7.5 mg tablet, 28	N05AH03
		olanzapine	8186W	Zypine	olanzapine 7.5 mg tablet, 28	N05AH03
		quetiapine	8457D	Syquet	quetiapine 100 mg tablet, 90	N05AH04
		quetiapine	5458G	Seroquel XR	quetiapine 150 mg modified release tablet, 60	N05AH04
		quetiapine	9203J	Seroquel XR	quetiapine 200 mg modified release tablet, 60	N05AH04
		quetiapine	8458E	Syquet	quetiapine 200 mg tablet, 60	N05AH04
		quetiapine	8456C	Syquet	quetiapine 25 mg tablet, 60	N05AH04
		quetiapine	9204K	Seroquel XR	quetiapine 300 mg modified release tablet, 60	N05AH04
		quetiapine	8580N	Syquet	quetiapine 300 mg tablet, 60	N05AH04
		quetiapine	9205L	Seroquel XR	quetiapine 400 mg modified release tablet, 60	N05AH04
		quetiapine	9202H	Seroquel XR	quetiapine 50 mg modified release tablet, 60	N05AH04
		risperidone	8791Q	Risperdal	Oral solution 1 mg per mL, 30 mL	N05AX08
		risperidone	3169T	Rixadone	risperidone 1 mg tablet, 60	N05AX08
		risperidone	8789N	Rixadone	risperidone 1 mg tablet, 60	N05AX08
		risperidone	8790P	Risperdal Quicklet	risperidone 1 mg tablet: orally disintegrating, 28	N05AX08
		risperidone	8792R	Risperdal Quicklet	risperidone 1 mg tablet: orally disintegrating, 28	N05AX08
		risperidone	8100H	Risperdal	risperidone 1 mg/mL oral liquid, 100 mL	N05AX08
		risperidone	9293D	Risperdal	risperidone 1 mg/mL oral liquid, 100 mL	N05AX08
		risperidone	3170W	Rixadone	risperidone 2 mg tablet, 60	N05AX08
		risperidone	9079W	Rixadone	risperidone 2 mg tablet, 60	N05AX08
		risperidone	8794W	Risperdal Quicklet	risperidone 2 mg tablet: orally disintegrating, 28	N05AX08
		risperidone	9080X	Risperdal Quicklet	risperidone 2 mg tablet: orally disintegrating, 28	N05AX08
		risperidone	8780D	Risperdal Consta	risperidone 25 mg modified release injection [1 vial] (&) inert substance diluent [2 mL syringe], 1 pack	N05AX08
		risperidone	3171X	Rixadone	risperidone 3 mg tablet, 60	N05AX08
		risperidone	9075P	Risperdal Quicklet	risperidone 3 mg tablet: orally disintegrating, 28	N05AX08
		risperidone	8781E	Risperdal Consta	risperidone 37.5 mg modified release injection [1 vial] (&) inert substance diluent [2 mL syringe], 1 pack	N05AX08
		risperidone	3172Y	Rixadone	risperidone 4 mg tablet, 60	N05AX08
		risperidone	9076Q	Risperdal Quicklet	risperidone 4 mg tablet: orally disintegrating, 28	N05AX08
		risperidone	8782F	Risperdal Consta	risperidone 50 mg modified release injection [1 vial] (&) inert substance diluent [2 mL syringe], 1 pack	N05AX08
		risperidone	1842Y	Risperdal	risperidone 500 microgram tablet, 20	N05AX08
		risperidone	1846E	Risperdal	risperidone 500 microgram tablet, 20	N05AX08
		risperidone	8787L	Rixadone	risperidone 500 microgram tablet, 60	N05AX08
		risperidone	8869T	Rixadone	risperidone 500 microgram tablet, 60	N05AX08
		risperidone	8788M	Risperdal Quicklet	risperidone 500 microgram tablet: orally disintegrating, 28	N05AX08
		risperidone	8870W	Risperdal Quicklet	risperidone 500 microgram tablet: orally disintegrating, 28	N05AX08
		ziprasidone	9070J	Zeldox	ziprasidone 20 mg capsule, 60	N05AE04
		ziprasidone	9071K	Zeldox	ziprasidone 40 mg capsule, 60	N05AE04
		ziprasidone	9072L	Zeldox	ziprasidone 60 mg capsule, 60	N05AE04
		ziprasidone	9073M	Zeldox	ziprasidone 80 mg capsule, 60	N05AE04
	Drugs for Schiz only	amisulpride	8594H	Sulprix	amisulpride 100 mg tablet, 30	N05AL05
		amisulpride	8736T	Solian Solution	amisulpride 100 mg/mL oral liquid, 60 mL	N05AL05
		amisulpride	8595J	Sulprix	amisulpride 200 mg tablet, 60	N05AL05
		amisulpride	8596K	Sulprix	amisulpride 400 mg tablet, 60	N05AL05
		chlorpromazine	1196Y	Largactil	chlorpromazine hydrochloride 10 mg tablet, 100	N05AA01
		chlorpromazine	1199D	Largactil	chlorpromazine hydrochloride 100 mg tablet, 100	N05AA01
		chlorpromazine	1197B	Largactil	chlorpromazine hydrochloride 25 mg tablet, 100	N05AA01
		chlorpromazine	1201F	Largactil	chlorpromazine hydrochloride 5 mg/mL oral liquid, 100 mL	N05AA01
		chlorpromazine	1195X	Largactil	chlorpromazine hydrochloride 50 mg/2 mL injection, 10 x 2 mL ampoules	N05AA01
		chlorpromazine	3455W	Largactil	chlorpromazine hydrochloride 50 mg/2 mL injection, 10 x 2 mL ampoules	N05AA01
		clozapine	10358E	Clozaril 100	clozapine 100 mg tablet, 100	N05AH02
		clozapine	5629G	Clozaril 100	clozapine 100 mg tablet, 100	N05AH02
		clozapine	6102E	Clozaril 100	clozapine 100 mg tablet, 100	N05AH02
		clozapine	10288L	Clopine 200	clozapine 200 mg tablet, 100	N05AH02
		clozapine	5627E	Clopine 200	clozapine 200 mg tablet, 100	N05AH02
		clozapine	6418T	Clopine 200	clozapine 200 mg tablet, 100	N05AH02
		clozapine	10289M	Clozaril 25	clozapine 25 mg tablet, 100	N05AH02
		clozapine	5628F	Clozaril 25	clozapine 25 mg tablet, 100	N05AH02
		clozapine	6101D	Clozaril 25	clozapine 25 mg tablet, 100	N05AH02
		clozapine	10302F	Clopine 50	clozapine 50 mg tablet, 100	N05AH02
		clozapine	5626D	Clopine 50	clozapine 50 mg tablet, 100	N05AH02
		clozapine	6417R	Clopine 50	clozapine 50 mg tablet, 100	N05AH02
		clozapine	10341G	Clopine Suspension	clozapine 50 mg/mL oral liquid, 100 mL	N05AH02
		clozapine	5630H	Clopine Suspension	clozapine 50 mg/mL oral liquid, 100 mL	N05AH02
		clozapine	9632Y	Clopine Suspension	clozapine 50 mg/mL oral liquid, 100 mL	N05AH02
		flupenthixol decanoate	2256R	Fluanxol Depot	Oily I.M. injection 40 mg in 2 mL	N05AF01
		flupenthixol decanoate	2257T	Fluanxol Concentrated Depot	flupenthixol decanoate 100 mg/mL injection, 5 x 1 mL ampoules	N05AF01
		flupenthixol decanoate	2255Q	Fluanxol Depot	flupenthixol decanoate 20 mg/mL injection, 5 x 1 mL ampoules	N05AF01
		lurasidone	10526B	Latuda	lurasidone hydrochloride 40 mg tablet, 30	N05AE05
		lurasidone	10529E	Latuda	lurasidone hydrochloride 80 mg tablet, 30	N05AE05
		paliperidone	9194X	Invega	Tablet 12 mg (prolonged release)	N05AX13
		paliperidone	5107T	Invega Sustenna	paliperidone 100 mg modified release injection, 1 syringe	N05AX13
		paliperidone	5109X	Invega Sustenna	paliperidone 150 mg modified release injection, 1 syringe	N05AX13
		paliperidone	11085K	Invega Trinza	paliperidone 175 mg/0.875 mL modified release injection, 0.875 mL syringe	N05AX13
		paliperidone	5100K	Invega Sustenna	paliperidone 25 mg modified release injection, 1 syringe	N05AX13
		paliperidone	11072R	Invega Trinza	paliperidone 263 mg/1.315 mL modified release injection, 1.315 mL syringe	N05AX13
		paliperidone	9140C	Invega	paliperidone 3 mg modified release tablet, 28	N05AX13
		paliperidone	11094X	Invega Trinza	paliperidone 350 mg/1.75 mL modified release injection, 1.75 mL syringe	N05AX13
		paliperidone	5102M	Invega Sustenna	paliperidone 50 mg modified release injection, 1 syringe	N05AX13
		paliperidone	11066K	Invega Trinza	paliperidone 525 mg/2.625 mL modified release injection, 2.625 mL syringe	N05AX13
		paliperidone	9141D	Invega	paliperidone 6 mg modified release tablet, 28	N05AX13
		paliperidone	5103N	Invega Sustenna	paliperidone 75 mg modified release injection, 1 syringe	N05AX13
		paliperidone	9142E	Invega	paliperidone 9 mg modified release tablet, 28	N05AX13
		pericyazine	3053Q	Neulactil	pericyazine 10 mg tablet, 100	N05AC01
		pericyazine	3052P	Neulactil	pericyazine 2.5 mg tablet, 100	N05AC01
		trifluoperazine	2185B	Stelazine	trifluoperazine 1 mg tablet, 100	N05AB06
		trifluoperazine	2386N	Stelazine	trifluoperazine 2 mg tablet, 100	N05AB06
		trifluoperazine	2186C	Stelazine	trifluoperazine 5 mg tablet, 100	N05AB06
		zuclopenthixol decanoate	8097E	Clopixol Depot	zuclopenthixol decanoate 200 mg/mL injection, 5 x 1 mL ampoules	N05AF05
	Anxiety	alprazolam	2132F	Kalma 1	alprazolam 1 mg tablet, 50	N05BA12
		alprazolam	8118G	Kalma 2	alprazolam 2 mg tablet, 50	N05BA12
		alprazolam	2130D	Kalma 0.25	alprazolam 250 microgram tablet, 50	N05BA12
		alprazolam	2131E	Kalma 0.5	alprazolam 500 microgram tablet, 50	N05BA12
		buspirone	4145E	Buspar	buspirone hydrochloride 10 mg tablet, 50	N05BE01
		buspirone	4144D	Buspar	buspirone hydrochloride 5 mg tablet, 50	N05BE01
		diazepam	2558P	Hospira Pty Limited	diazepam 10 mg/2 mL injection, 5 x 2 mL ampoules	N05BA01
		diazepam	3458B	Hospira Pty Limited	diazepam 10 mg/2 mL injection, 5 x 2 mL ampoules	N05BA01
		diazepam	3161J	Antenex 2	diazepam 2 mg tablet, 50	N05BA01
		diazepam	5071X	Antenex 2	diazepam 2 mg tablet, 50	N05BA01
		diazepam	5355W	Antenex 2	diazepam 2 mg tablet, 50	N05BA01
		diazepam	5357Y	Antenex 2	diazepam 2 mg tablet, 50	N05BA01
		diazepam	3162K	Antenex 5	diazepam 5 mg tablet, 50	N05BA01
		diazepam	5072Y	Antenex 5	diazepam 5 mg tablet, 50	N05BA01
		diazepam	5356X	Antenex 5	diazepam 5 mg tablet, 50	N05BA01
		diazepam	5358B	Antenex 5	diazepam 5 mg tablet, 50	N05BA01
		oxazepam	3132W	Alepam 15	oxazepam 15 mg tablet, 25	N05BA04
		oxazepam	3134Y	Alepam 15	oxazepam 15 mg tablet, 25	N05BA04
		oxazepam	5192G	Alepam 15	oxazepam 15 mg tablet, 25	N05BA04
		oxazepam	5371Q	Alepam 15	oxazepam 15 mg tablet, 25	N05BA04
		oxazepam	5373T	Alepam 15	oxazepam 15 mg tablet, 25	N05BA04
		oxazepam	3133X	Alepam 30	oxazepam 30 mg tablet, 25	N05BA04
		oxazepam	3135B	Alepam 30	oxazepam 30 mg tablet, 25	N05BA04
		oxazepam	5193H	Alepam 30	oxazepam 30 mg tablet, 25	N05BA04
		oxazepam	5372R	Alepam 30	oxazepam 30 mg tablet, 25	N05BA04
		oxazepam	5374W	Alepam 30	oxazepam 30 mg tablet, 25	N05BA04
	Depression	amitriptyline	2417F	Endep 10	amitriptyline hydrochloride 10 mg tablet, 50	N06AA09
		amitriptyline	2418G	Endep 25	amitriptyline hydrochloride 25 mg tablet, 50	N06AA09
		amitriptyline	2429W	Endep 50	amitriptyline hydrochloride 50 mg tablet, 50	N06AA09
		citalopram	8702B	Celapram	citalopram 10 mg tablet, 28	N06AB04
		citalopram	8220P	Celapram	citalopram 20 mg tablet, 28	N06AB04
		citalopram	8703C	Celapram	citalopram 40 mg tablet, 28	N06AB04
		clomipramine	1561E	Placil	clomipramine hydrochloride 25 mg tablet, 50	N06AA04
		desvenlafaxine	10231L	Desfax	desvenlafaxine 100 mg modified release tablet, 28	N06AX23
		desvenlafaxine	10245F	Desvenlafaxine GH XR	desvenlafaxine 100 mg modified release tablet, 28	N06AX23
		desvenlafaxine	9367B	Pristiq	desvenlafaxine 100 mg modified release tablet, 28	N06AX23
		desvenlafaxine	10234P	Desvenlafaxine GH XR	desvenlafaxine 50 mg modified release tablet, 28	N06AX23
		desvenlafaxine	10241B	Desfax	desvenlafaxine 50 mg modified release tablet, 28	N06AX23
		desvenlafaxine	9366Y	Pristiq	desvenlafaxine 50 mg modified release tablet, 28	N06AX23
		dothiepin	1357K	Dothep 25	dothiepin hydrochloride 25 mg capsule, 50	N06AA16
		dothiepin	1358L	Dothep 75	dothiepin hydrochloride 75 mg tablet, 30	N06AA16
		doxepin	1011F	Deptran 10	doxepin 10 mg capsule, 50	N06AA12
		doxepin	1013H	Deptran 25	doxepin 25 mg capsule, 50	N06AA12
		doxepin	1012G	Deptran 50	doxepin 50 mg tablet, 50	N06AA12
		duloxetine	9155W	Tixol	duloxetine 30 mg enteric capsule, 28	N06AX21
		duloxetine	9156X	Tixol	duloxetine 60 mg enteric capsule, 28	N06AX21
		escitalopram	8700X	LoxaLate	escitalopram 10 mg tablet, 28	N06AB10
		escitalopram	9432K	Esipram	escitalopram 10 mg tablet, 28	N06AB10
		escitalopram	8849R	Lexapro	escitalopram 10 mg/mL oral liquid, 28 mL	N06AB10
		escitalopram	8701Y	LoxaLate	escitalopram 20 mg tablet, 28	N06AB10
		escitalopram	9433L	Esipram	escitalopram 20 mg tablet, 28	N06AB10
		escitalopram	10181W	Lexapro	escitalopram 20 mg/mL oral liquid, 15 mL	N06AB10
		escitalopram oxalate	9700M	Lexapro	Oral solution 10 mg (base) per mL, 28 mL	N06AB10
		fluoxetine	1434L	Zactin	fluoxetine 20 mg capsule, 28	N06AB03
		fluoxetine	8270G	Zactin Tablet	fluoxetine 20 mg dispersible tablet, 28	N06AB03
		fluvoxamine	8174F	Movox 100	fluvoxamine maleate 100 mg tablet, 30	N06AB08
		fluvoxamine	8512B	Movox 50	fluvoxamine maleate 50 mg tablet, 30	N06AB08
		imipramine	2420J	Tofranil 10	imipramine hydrochloride 10 mg tablet, 50	N06AA02
		imipramine	2421K	Tofranil 25	imipramine hydrochloride 25 mg tablet, 50	N06AA02
		mianserin	1627P	Lumin 10	mianserin hydrochloride 10 mg tablet, 50	N06AX03
		mianserin	1628Q	Lumin 20	mianserin hydrochloride 20 mg tablet, 50	N06AX03
		mirtazapine	8855C	Remeron SolTab	MIRTAZAPINE Tablet 15 mg (orally disintegrating), 30	N06AX11
		mirtazapine	8856D	Remeron SolTab	MIRTAZAPINE Tablet 30 mg (orally disintegrating), 30	N06AX11
		mirtazapine	8857E	Remeron SolTab	MIRTAZAPINE Tablet 45 mg (orally disintegrating), 30	N06AX11
		mirtazapine	9365X	Axit 15	mirtazapine 15 mg tablet, 30	N06AX11
		mirtazapine	8513C	Axit 30	mirtazapine 30 mg tablet, 30	N06AX11
		mirtazapine	8883M	Axit 45	mirtazapine 45 mg tablet, 30	N06AX11
		moclobemide	1900B	Amira 150	moclobemide 150 mg tablet, 60	N06AG02
		moclobemide	8003F	Amira 300	moclobemide 300 mg tablet, 60	N06AG02
		nortriptyline	2522R	NortriTABS 10 mg	nortriptyline 10 mg tablet, 50	N06AA10
		nortriptyline	2523T	NortriTABS 25 mg	nortriptyline 25 mg tablet, 50	N06AA10
		paroxetine	2242B	Paxtine	paroxetine 20 mg tablet, 30	N06AB05
		paroxetine	9197C	Paroxetine generichealth	paroxetine 20 mg tablet, 30	N06AB05
		phenelzine	2856H	Nardil	phenelzine 15 mg tablet, 100	N06AF03
		reboxetine	8583R	Edronax	reboxetine 4 mg tablet, 60	N06AX18
		sertraline	2237R	Eleva 100	sertraline 100 mg tablet, 30	N06AB06
		sertraline	8837D	Eleva 100	sertraline 100 mg tablet, 30	N06AB06
		sertraline	2236Q	Eleva 50	sertraline 50 mg tablet, 30	N06AB06
		sertraline	8836C	Eleva 50	sertraline 50 mg tablet, 30	N06AB06
		tranylcypromine	2444P	Parnate	tranylcypromine 10 mg tablet, 50	N06AF04
		venlafaxine	8302Y	Enlafax-XR	venlafaxine 150 mg modified release capsule, 28	N06AX16
		venlafaxine	8868R	Venlafaxine AN SR	venlafaxine 37.5 mg modified release capsule, 28	N06AX16
		venlafaxine	8301X	Enlafax-XR	venlafaxine 75 mg modified release capsule, 28	N06AX16

## Sheet: Bone Disease
	Bone Disease
	About:
	Osteoporosis and other bone diseases
	Drug Group	Drug	Drug Code	Brands	Form and Strength	ATC Code
	Bone Disease	alendronate	2215N	Fosamax Once Weekly	alendronate 70 mg tablet, 4	M05BA04
		alendronate	8511Y	Fonat	alendronate 70 mg tablet, 4	M05BA04
		alendronate + colecalciferol	2224C	FonatPlus	alendronate 70 mg + colecalciferol 140 microgram tablet, 4	M05BB03
		alendronate + colecalciferol	9183H	FonatPlus	alendronate 70 mg + colecalciferol 140 microgram tablet, 4	M05BB03
		alendronate + colecalciferol	2194L	FonatPlus	alendronate 70 mg + colecalciferol 70 microgram tablet, 4	M05BB03
		alendronate + colecalciferol	9012H	FonatPlus	alendronate 70 mg + colecalciferol 70 microgram tablet, 4	M05BB03
		alendronate + colecalciferol (&) calcium carbonate	2273P	Fosamax Plus D-Cal	alendronate 70 mg + colecalciferol 140 microgram tablet [4] (&) calcium (as carbonate) 500 mg tablet [48], 1 pack	M05BB05
		alendronate + colecalciferol (&) calcium carbonate	9351E	Dronalen Plus D-Cal	alendronate 70 mg + colecalciferol 140 microgram tablet [4] (&) calcium (as carbonate) 500 mg tablet [48], 1 pack	M05BB05
		calcitriol	2502Q	Sical	calcitriol 0.25 microgram capsule, 100	A11CC04
		calcium	3116B	Cal-Sup	CALCIUM Tablet (chewable) 500 mg (as carbonate), 60	A12AA04
		calcium	4094L	Cal-Sup	CALCIUM Tablet (chewable) 500 mg (as carbonate), 60	A12AA04
		calcium	4333C	Cal-Sup	CALCIUM Tablet (chewable) 500 mg (as carbonate), 60	A12AA04
		calcium	4082W	CAL-600	CALCIUM Tablet 600 mg (as carbonate), 120	A12AA04
		calcium	4142B	CAL-600	CALCIUM Tablet 600 mg (as carbonate), 120	A12AA04
		calcium	3117C	Calci-Tab 600	CALCIUM Tablet 600 mg (as carbonate), 240	A12AA04
		calcium	4093K	Citracal	Tablet 250 mg (as citrate)	A12AA
		calcium	4332B	Citracal	Tablet 250 mg (as citrate)	A12AA
		calcium	8560M	Citracal	Tablet 250 mg (as citrate)	A12AA
		calcium	4334D	Caltrate	Tablet 600 mg (as carbonate)	A12AA04
		denosumab	5457F	Prolia	denosumab 60 mg/mL injection, 1 mL syringe	M05BX04
		disodium etidronate and calcium carbonate	8056B	Didrocal	Pack containing 28 tablets disodium etidronate 200 mg and 76 tablets calcium carbonate 1.25 g (equivalent to 500 mg calcium)	M05BB01
		raloxifene	8363E	Fixta 60	raloxifene hydrochloride 60 mg tablet, 28	M05BX
		risedronate	2191H	Actonel EC	RISEDRONATE SODIUM Tablet 35 mg (enteric coated), 4	M05BA07
		risedronate	8972F	Actonel EC	RISEDRONATE SODIUM Tablet 35 mg (enteric coated), 4	M05BA07
		risedronate	9391G	Acris Once-a-Month	risedronate sodium 150 mg tablet, 1	M05BA07
		risedronate	8482K	Actonel	risedronate sodium 30 mg tablet, 28	M05BA07
		risedronate	4444X	Acris Once-a-Week	risedronate sodium 35 mg tablet, 4	M05BA07
		risedronate	8621R	Acris Once-a-Week	risedronate sodium 35 mg tablet, 4	M05BA07
		risedronate	4443W	Actonel	risedronate sodium 5 mg tablet, 28	M05BA07
		risedronate	8481J	Actonel	risedronate sodium 5 mg tablet, 28	M05BA07
		risedronate (&) calcium carbonate	2220W	Actonel EC Combi	RISEDRONATE SODIUM and CALCIUM CARBONATE Pack containing 4 enteric coated tablets risedronate sodium 35 mg and 24 tablets calcium carbonate 1.25 g (eq	M05BB02
		risedronate (&) calcium carbonate	8973G	Actonel EC Combi	RISEDRONATE SODIUM and CALCIUM CARBONATE Pack containing 4 enteric coated tablets risedronate sodium 35 mg and 24 tablets calcium carbonate 1.25 g (eq	M05BB02
		risedronate (&) calcium carbonate	4059P	Acris Combi	risedronate sodium 35 mg tablet [4] (&) calcium (as carbonate) 500 mg tablet [24], 28	M05BB02
		risedronate (&) calcium carbonate	8899J	Acris Combi	risedronate sodium 35 mg tablet [4] (&) calcium (as carbonate) 500 mg tablet [24], 28	M05BB02
		risedronate (&) calcium carbonate + colecalciferol	2254P	Actonel EC Combi D	RISEDRONATE SODIUM and CALCIUM CARBONATE with COLECALCIFEROL Pack containing 4 enteric coated tablets risedronate sodium 35 mg and 24 sachets containi	M05BB04
		risedronate (&) calcium carbonate + colecalciferol	8974H	Actonel EC Combi D	RISEDRONATE SODIUM and CALCIUM CARBONATE with COLECALCIFEROL Pack containing 4 enteric coated tablets risedronate sodium 35 mg and 24 sachets containi	M05BB04
		risedronate sodium and calcium carbonate with colecalciferol	4380M	Actonel Combi D	Pack containing 4 tablets risedronate sodium 35 mg and 24 sachets containing granules of calcium carbonate 2.5 g (equivalent to 1 g	M05BB04
		risedronate sodium and calcium carbonate with colecalciferol	9147K	Actonel Combi D	Pack containing 4 tablets risedronate sodium 35 mg and 24 sachets containing granules of calcium carbonate 2.5 g (equivalent to 1 g calcium	M05BB04
		salcatonin	2997R	Miacalcic 100	salcatonin 100 units/mL injection, 5 x 1 mL ampoules	H05BA01
		salcatonin	2995P	Miacalcic 50	salcatonin 50 international units/mL injection, 5 x 1 mL ampoules	H05BA01
		strontium	3036T	Protos 2 g	strontium ranelate 2 g granules, 28 sachets	M05BX03
		teriparatide	9411H	Forteo	teriparatide 20 microgram injection, 2.4 mL cartridge	H05AA02
		tiludronate	8267D	Skelid	tiludronate 200 mg tablet, 56	M05BA05
		zoledronic acid	10548E	Zometa	zoledronic acid 4 mg/100 mL injection, 100 mL vial	M05BA08
		zoledronic acid	10554L	Zometa	zoledronic acid 4 mg/100 mL injection, 100 mL vial	M05BA08
		zoledronic acid	6371H	Zometa	zoledronic acid 4 mg/5 mL injection, 5 mL vial	M05BA08
		zoledronic acid	9653C	Zometa	zoledronic acid 4 mg/5 mL injection, 5 mL vial	M05BA08
		zoledronic acid	9288W	Aclasta	zoledronic acid 5 mg/100 mL injection, 100 mL vial	M05BA08
		zoledronic acid	9350D	Aclasta	zoledronic acid 5 mg/100 mL injection, 100 mL vial	M05BA08

## Sheet: Lipids
	Any Lipid Lowering Drug
	About:
	Cholesterol lowering drugs of any class
	Drug Group	Drug	Drug Code	Brands	Form and Strength	ATC Code
	Any Lipid Lowering Agent	amlodipine + atorvastatin	9053L	Cadivast 10/10	amlodipine 10 mg + atorvastatin 10 mg tablet, 30	C10BX03
		amlodipine + atorvastatin	9054M	Cadivast 10/20	amlodipine 10 mg + atorvastatin 20 mg tablet, 30	C10BX03
		amlodipine + atorvastatin	9055N	Cadivast 10/40	amlodipine 10 mg + atorvastatin 40 mg tablet, 30	C10BX03
		amlodipine + atorvastatin	9056P	Cadivast 10/80	amlodipine 10 mg + atorvastatin 80 mg tablet, 30	C10BX03
		amlodipine + atorvastatin	9049G	Cadivast 5/10	amlodipine 5 mg + atorvastatin 10 mg tablet, 30	C10BX03
		amlodipine + atorvastatin	9050H	Cadivast 5/20	amlodipine 5 mg + atorvastatin 20 mg tablet, 30	C10BX03
		amlodipine + atorvastatin	9051J	Cadivast 5/40	amlodipine 5 mg + atorvastatin 40 mg tablet, 30	C10BX03
		amlodipine + atorvastatin	9052K	Cadivast 5/80	amlodipine 5 mg + atorvastatin 80 mg tablet, 30	C10BX03
		atorvastatin	8213G	Lorstat 10	atorvastatin 10 mg tablet, 30	C10AA05
		atorvastatin	9230T	Lorstat 10	atorvastatin 10 mg tablet, 30	C10AA05
		atorvastatin	8214H	Lorstat 20	atorvastatin 20 mg tablet, 30	C10AA05
		atorvastatin	9231W	Lorstat 20	atorvastatin 20 mg tablet, 30	C10AA05
		atorvastatin	8215J	Lorstat 40	atorvastatin 40 mg tablet, 30	C10AA05
		atorvastatin	9232X	Lorstat 40	atorvastatin 40 mg tablet, 30	C10AA05
		atorvastatin	8521L	Lorstat 80	atorvastatin 80 mg tablet, 30	C10AA05
		atorvastatin	9233Y	Lorstat 80	atorvastatin 80 mg tablet, 30	C10AA05
		atorvastatin (&) ezetimibe	10002K	Atozet Composite Pack	atorvastatin 10 mg tablet [30] (&) ezetimibe 10 mg tablet [30], 1 pack	C10BA05
		atorvastatin (&) ezetimibe	2874G	Atozet Composite Pack	atorvastatin 20 mg tablet [30] (&) ezetimibe 10 mg tablet [30], 1 pack	C10BA05
		atorvastatin (&) ezetimibe	2821L	Atozet Composite Pack	atorvastatin 40 mg tablet [30] (&) ezetimibe 10 mg tablet [30], 1 pack	C10BA05
		atorvastatin (&) ezetimibe	10006P	Atozet Composite Pack	atorvastatin 80 mg tablet [30] (&) ezetimibe 10 mg tablet [30], 1 pack	C10BA05
		cholestyramine	2978R	Questran Lite	Sachets 9.4 g (equivalent to 8 g cholestyramine), 50	C10AC01
		cholestyramine	2967E	Questran Lite	cholestyramine 4 g powder for oral liquid, 50 sachets	C10AC01
		cholestyramine	9249T	Questran Lite	cholestyramine 4 g powder for oral liquid, 50 sachets	C10AC01
		colestipol hydrochloride	1224K	Colestid	colestipol hydrochloride 5 g granules, 120 sachets	C10AC02
		colestipol hydrochloride	9250W	Colestid	colestipol hydrochloride 5 g granules, 120 sachets	C10AC02
		evolocumab	10958R	Repatha	evolocumab 140 mg/mL injection, 1 mL injection device	C10AX13
		ezetimibe	8757X	Ezetrol	ezetimibe 10 mg tablet, 30	C10AX09
		ezetimibe + atorvastatin	10392Y	Atozet	ezetimibe 10 mg + atorvastatin 10 mg tablet, 30	C10BA05
		ezetimibe + atorvastatin	10393B	Atozet	ezetimibe 10 mg + atorvastatin 20 mg tablet, 30	C10BA05
		ezetimibe + atorvastatin	10377E	Atozet	ezetimibe 10 mg + atorvastatin 40 mg tablet, 30	C10BA05
		ezetimibe + atorvastatin	10376D	Atozet	ezetimibe 10 mg + atorvastatin 80 mg tablet, 30	C10BA05
		ezetimibe + simvastatin	9483D	Vytorin	ezetimibe 10 mg + simvastatin 10 mg tablet, 30	C10BA02
		ezetimibe + simvastatin	9484E	Vytorin	ezetimibe 10 mg + simvastatin 20 mg tablet, 30	C10BA02
		ezetimibe + simvastatin	8881K	Vytorin	ezetimibe 10 mg + simvastatin 40 mg tablet, 30	C10BA02
		ezetimibe + simvastatin	8882L	Vytorin	ezetimibe 10 mg + simvastatin 80 mg tablet, 30	C10BA02
		fenofibrate	9023X	Lipidil	fenofibrate 145 mg tablet, 30	C10AB05
		fenofibrate	9247Q	Lipidil	fenofibrate 145 mg tablet, 30	C10AB05
		fenofibrate	9022W	Lipidil	fenofibrate 48 mg tablet, 60	C10AB05
		fenofibrate	9246P	Lipidil	fenofibrate 48 mg tablet, 60	C10AB05
		fluvastatin	8023G	Vastin	fluvastatin 20 mg capsule, 28	C10AA04
		fluvastatin	9234B	Vastin	fluvastatin 20 mg capsule, 28	C10AA04
		fluvastatin	8024H	Vastin	fluvastatin 40 mg capsule, 28	C10AA04
		fluvastatin	9235C	Vastin	fluvastatin 40 mg capsule, 28	C10AA04
		fluvastatin	2863Q	Lescol XL	fluvastatin 80 mg modified release tablet, 28	C10AA04
		fluvastatin	9236D	Lescol XL	fluvastatin 80 mg modified release tablet, 28	C10AA04
		gemfibrozil	1453L	Lipigem	gemfibrozil 600 mg tablet, 60	C10AB04
		gemfibrozil	9248R	Lipigem	gemfibrozil 600 mg tablet, 60	C10AB04
		pravastatin	2833D	Cholstat 10	pravastatin sodium 10 mg tablet, 30	C10AA03
		pravastatin	9237E	Cholstat 10	pravastatin sodium 10 mg tablet, 30	C10AA03
		pravastatin	2834E	Cholstat 20	pravastatin sodium 20 mg tablet, 30	C10AA03
		pravastatin	9238F	Cholstat 20	pravastatin sodium 20 mg tablet, 30	C10AA03
		pravastatin	8197K	Cholstat 40	pravastatin sodium 40 mg tablet, 30	C10AA03
		pravastatin	9239G	Cholstat 40	pravastatin sodium 40 mg tablet, 30	C10AA03
		pravastatin	8829Q	Chem mart Pravastatin	pravastatin sodium 80 mg tablet, 30	C10AA03
		pravastatin	9240H	Chem mart Pravastatin	pravastatin sodium 80 mg tablet, 30	C10AA03
		rosuvastatin	2584B	Cavstat	rosuvastatin 10 mg tablet, 30	C10AA07
		rosuvastatin	2628H	Cavstat	rosuvastatin 10 mg tablet, 30	C10AA07
		rosuvastatin	3403D	Cavstat	rosuvastatin 10 mg tablet, 30	C10AA07
		rosuvastatin	9043Y	Cavstat	rosuvastatin 10 mg tablet, 30	C10AA07
		rosuvastatin	2574L	Cavstat	rosuvastatin 20 mg tablet, 30	C10AA07
		rosuvastatin	2609H	Cavstat	rosuvastatin 20 mg tablet, 30	C10AA07
		rosuvastatin	3404E	Cavstat	rosuvastatin 20 mg tablet, 30	C10AA07
		rosuvastatin	9044B	Cavstat	rosuvastatin 20 mg tablet, 30	C10AA07
		rosuvastatin	2594M	Cavstat	rosuvastatin 40 mg tablet, 30	C10AA07
		rosuvastatin	2636R	Cavstat	rosuvastatin 40 mg tablet, 30	C10AA07
		rosuvastatin	3405F	Cavstat	rosuvastatin 40 mg tablet, 30	C10AA07
		rosuvastatin	9045C	Cavstat	rosuvastatin 40 mg tablet, 30	C10AA07
		rosuvastatin	2590H	Cavstat	rosuvastatin 5 mg tablet, 30	C10AA07
		rosuvastatin	2606E	Cavstat	rosuvastatin 5 mg tablet, 30	C10AA07
		rosuvastatin	3402C	Cavstat	rosuvastatin 5 mg tablet, 30	C10AA07
		rosuvastatin	9042X	Cavstat	rosuvastatin 5 mg tablet, 30	C10AA07
		rosuvastatin (&) ezetimibe	10208G	Rosuzet Composite Pack	rosuvastatin 10 mg tablet [30] (&) ezetimibe 10 mg tablet [30], 1 pack	C10BA06
		rosuvastatin (&) ezetimibe	10201X	Rosuzet Composite Pack	rosuvastatin 20 mg tablet [30] (&) ezetimibe 10 mg tablet [30], 1 pack	C10BA06
		rosuvastatin (&) ezetimibe	10207F	Rosuzet Composite Pack	rosuvastatin 40 mg tablet [30] (&) ezetimibe 10 mg tablet [30 tablets], 1 pack	C10BA06
		rosuvastatin (&) ezetimibe	10204C	Rosuzet Composite Pack	rosuvastatin 5 mg tablet [30] (&) ezetimibe 10 mg tablet [30], 1 pack	C10BA06
		simvastatin	2011W	Zimstat	simvastatin 10 mg tablet, 30	C10AA01
		simvastatin	9242K	Zimstat	simvastatin 10 mg tablet, 30	C10AA01
		simvastatin	2012X	Zimstat	simvastatin 20 mg tablet, 30	C10AA01
		simvastatin	9243L	Zimstat	simvastatin 20 mg tablet, 30	C10AA01
		simvastatin	8173E	Zimstat	simvastatin 40 mg tablet, 30	C10AA01
		simvastatin	9244M	Zimstat	simvastatin 40 mg tablet, 30	C10AA01
		simvastatin	2013Y	Zimstat	simvastatin 5 mg tablet, 30	C10AA01
		simvastatin	9241J	Zimstat	simvastatin 5 mg tablet, 30	C10AA01
		simvastatin	8313M	Zimstat	simvastatin 80 mg tablet, 30	C10AA01
		simvastatin	9245N	Zimstat	simvastatin 80 mg tablet, 30	C10AA01
	HMG COA Reductase Inhibitor (Statins)	amlodipine + atorvastatin	9053L	Cadivast 10/10	amlodipine 10 mg + atorvastatin 10 mg tablet, 30	C10BX03
		amlodipine + atorvastatin	9054M	Cadivast 10/20	amlodipine 10 mg + atorvastatin 20 mg tablet, 30	C10BX03
		amlodipine + atorvastatin	9055N	Cadivast 10/40	amlodipine 10 mg + atorvastatin 40 mg tablet, 30	C10BX03
		amlodipine + atorvastatin	9056P	Cadivast 10/80	amlodipine 10 mg + atorvastatin 80 mg tablet, 30	C10BX03
		amlodipine + atorvastatin	9049G	Cadivast 5/10	amlodipine 5 mg + atorvastatin 10 mg tablet, 30	C10BX03
		amlodipine + atorvastatin	9050H	Cadivast 5/20	amlodipine 5 mg + atorvastatin 20 mg tablet, 30	C10BX03
		amlodipine + atorvastatin	9051J	Cadivast 5/40	amlodipine 5 mg + atorvastatin 40 mg tablet, 30	C10BX03
		amlodipine + atorvastatin	9052K	Cadivast 5/80	amlodipine 5 mg + atorvastatin 80 mg tablet, 30	C10BX03
		atorvastatin	8213G	Lorstat 10	atorvastatin 10 mg tablet, 30	C10AA05
		atorvastatin	9230T	Lorstat 10	atorvastatin 10 mg tablet, 30	C10AA05
		atorvastatin	8214H	Lorstat 20	atorvastatin 20 mg tablet, 30	C10AA05
		atorvastatin	9231W	Lorstat 20	atorvastatin 20 mg tablet, 30	C10AA05
		atorvastatin	8215J	Lorstat 40	atorvastatin 40 mg tablet, 30	C10AA05
		atorvastatin	9232X	Lorstat 40	atorvastatin 40 mg tablet, 30	C10AA05
		atorvastatin	8521L	Lorstat 80	atorvastatin 80 mg tablet, 30	C10AA05
		atorvastatin	9233Y	Lorstat 80	atorvastatin 80 mg tablet, 30	C10AA05
		atorvastatin (&) ezetimibe	10002K	Atozet Composite Pack	atorvastatin 10 mg tablet [30] (&) ezetimibe 10 mg tablet [30], 1 pack	C10BA05
		atorvastatin (&) ezetimibe	2874G	Atozet Composite Pack	atorvastatin 20 mg tablet [30] (&) ezetimibe 10 mg tablet [30], 1 pack	C10BA05
		atorvastatin (&) ezetimibe	2821L	Atozet Composite Pack	atorvastatin 40 mg tablet [30] (&) ezetimibe 10 mg tablet [30], 1 pack	C10BA05
		atorvastatin (&) ezetimibe	10006P	Atozet Composite Pack	atorvastatin 80 mg tablet [30] (&) ezetimibe 10 mg tablet [30], 1 pack	C10BA05
		ezetimibe + atorvastatin	10392Y	Atozet	ezetimibe 10 mg + atorvastatin 10 mg tablet, 30	C10BA05
		ezetimibe + atorvastatin	10393B	Atozet	ezetimibe 10 mg + atorvastatin 20 mg tablet, 30	C10BA05
		ezetimibe + atorvastatin	10377E	Atozet	ezetimibe 10 mg + atorvastatin 40 mg tablet, 30	C10BA05
		ezetimibe + atorvastatin	10376D	Atozet	ezetimibe 10 mg + atorvastatin 80 mg tablet, 30	C10BA05
		ezetimibe + simvastatin	9483D	Vytorin	ezetimibe 10 mg + simvastatin 10 mg tablet, 30	C10BA02
		ezetimibe + simvastatin	9484E	Vytorin	ezetimibe 10 mg + simvastatin 20 mg tablet, 30	C10BA02
		ezetimibe + simvastatin	8881K	Vytorin	ezetimibe 10 mg + simvastatin 40 mg tablet, 30	C10BA02
		ezetimibe + simvastatin	8882L	Vytorin	ezetimibe 10 mg + simvastatin 80 mg tablet, 30	C10BA02
		fluvastatin	8023G	Vastin	fluvastatin 20 mg capsule, 28	C10AA04
		fluvastatin	9234B	Vastin	fluvastatin 20 mg capsule, 28	C10AA04
		fluvastatin	8024H	Vastin	fluvastatin 40 mg capsule, 28	C10AA04
		fluvastatin	9235C	Vastin	fluvastatin 40 mg capsule, 28	C10AA04
		fluvastatin	2863Q	Lescol XL	fluvastatin 80 mg modified release tablet, 28	C10AA04
		fluvastatin	9236D	Lescol XL	fluvastatin 80 mg modified release tablet, 28	C10AA04
		pravastatin	2833D	Cholstat 10	pravastatin sodium 10 mg tablet, 30	C10AA03
		pravastatin	9237E	Cholstat 10	pravastatin sodium 10 mg tablet, 30	C10AA03
		pravastatin	2834E	Cholstat 20	pravastatin sodium 20 mg tablet, 30	C10AA03
		pravastatin	9238F	Cholstat 20	pravastatin sodium 20 mg tablet, 30	C10AA03
		pravastatin	8197K	Cholstat 40	pravastatin sodium 40 mg tablet, 30	C10AA03
		pravastatin	9239G	Cholstat 40	pravastatin sodium 40 mg tablet, 30	C10AA03
		pravastatin	8829Q	Chem mart Pravastatin	pravastatin sodium 80 mg tablet, 30	C10AA03
		pravastatin	9240H	Chem mart Pravastatin	pravastatin sodium 80 mg tablet, 30	C10AA03
		rosuvastatin	2584B	Cavstat	rosuvastatin 10 mg tablet, 30	C10AA07
		rosuvastatin	2628H	Cavstat	rosuvastatin 10 mg tablet, 30	C10AA07
		rosuvastatin	3403D	Cavstat	rosuvastatin 10 mg tablet, 30	C10AA07
		rosuvastatin	9043Y	Cavstat	rosuvastatin 10 mg tablet, 30	C10AA07
		rosuvastatin	2574L	Cavstat	rosuvastatin 20 mg tablet, 30	C10AA07
		rosuvastatin	2609H	Cavstat	rosuvastatin 20 mg tablet, 30	C10AA07
		rosuvastatin	3404E	Cavstat	rosuvastatin 20 mg tablet, 30	C10AA07
		rosuvastatin	9044B	Cavstat	rosuvastatin 20 mg tablet, 30	C10AA07
		rosuvastatin	2594M	Cavstat	rosuvastatin 40 mg tablet, 30	C10AA07
		rosuvastatin	2636R	Cavstat	rosuvastatin 40 mg tablet, 30	C10AA07
		rosuvastatin	3405F	Cavstat	rosuvastatin 40 mg tablet, 30	C10AA07
		rosuvastatin	9045C	Cavstat	rosuvastatin 40 mg tablet, 30	C10AA07
		rosuvastatin	2590H	Cavstat	rosuvastatin 5 mg tablet, 30	C10AA07
		rosuvastatin	2606E	Cavstat	rosuvastatin 5 mg tablet, 30	C10AA07
		rosuvastatin	3402C	Cavstat	rosuvastatin 5 mg tablet, 30	C10AA07
		rosuvastatin	9042X	Cavstat	rosuvastatin 5 mg tablet, 30	C10AA07
		rosuvastatin (&) ezetimibe	10208G	Rosuzet Composite Pack	rosuvastatin 10 mg tablet [30] (&) ezetimibe 10 mg tablet [30], 1 pack	C10BA06
		rosuvastatin (&) ezetimibe	10201X	Rosuzet Composite Pack	rosuvastatin 20 mg tablet [30] (&) ezetimibe 10 mg tablet [30], 1 pack	C10BA06
		rosuvastatin (&) ezetimibe	10207F	Rosuzet Composite Pack	rosuvastatin 40 mg tablet [30] (&) ezetimibe 10 mg tablet [30 tablets], 1 pack	C10BA06
		rosuvastatin (&) ezetimibe	10204C	Rosuzet Composite Pack	rosuvastatin 5 mg tablet [30] (&) ezetimibe 10 mg tablet [30], 1 pack	C10BA06
		simvastatin	2011W	Zimstat	simvastatin 10 mg tablet, 30	C10AA01
		simvastatin	9242K	Zimstat	simvastatin 10 mg tablet, 30	C10AA01
		simvastatin	2012X	Zimstat	simvastatin 20 mg tablet, 30	C10AA01
		simvastatin	9243L	Zimstat	simvastatin 20 mg tablet, 30	C10AA01
		simvastatin	8173E	Zimstat	simvastatin 40 mg tablet, 30	C10AA01
		simvastatin	9244M	Zimstat	simvastatin 40 mg tablet, 30	C10AA01
		simvastatin	2013Y	Zimstat	simvastatin 5 mg tablet, 30	C10AA01
		simvastatin	9241J	Zimstat	simvastatin 5 mg tablet, 30	C10AA01
		simvastatin	8313M	Zimstat	simvastatin 80 mg tablet, 30	C10AA01
		simvastatin	9245N	Zimstat	simvastatin 80 mg tablet, 30	C10AA01
		simvastatin + sitagliptin	2391W	Juvicor	simvastatin 10 mg + sitagliptin 100 mg tablet: film-coated, 28	A10BH51
		simvastatin + sitagliptin	2377D	Juvicor	simvastatin 20 mg + sitagliptin 100 mg tablet: film-coated, 28	A10BH51
		simvastatin + sitagliptin	2383K	Juvicor	simvastatin 40 mg + sitagliptin 100 mg tablet: film-coated, 28	A10BH51
	Other Lipid Lowering Agents Only	cholestyramine	2978R	Questran Lite	Sachets 9.4 g (equivalent to 8 g cholestyramine), 50	C10AC01
		cholestyramine	2967E	Questran Lite	cholestyramine 4 g powder for oral liquid, 50 sachets	C10AC01
		cholestyramine	9249T	Questran Lite	cholestyramine 4 g powder for oral liquid, 50 sachets	C10AC01
		colestipol hydrochloride	1224K	Colestid	colestipol hydrochloride 5 g granules, 120 sachets	C10AC02
		colestipol hydrochloride	9250W	Colestid	colestipol hydrochloride 5 g granules, 120 sachets	C10AC02
		evolocumab	10958R	Repatha	evolocumab 140 mg/mL injection, 1 mL injection device	C10AX13
		ezetimibe	8757X	Ezetrol	ezetimibe 10 mg tablet, 30	C10AX09
		fenofibrate	9023X	Lipidil	fenofibrate 145 mg tablet, 30	C10AB05
		fenofibrate	9247Q	Lipidil	fenofibrate 145 mg tablet, 30	C10AB05
		fenofibrate	9022W	Lipidil	fenofibrate 48 mg tablet, 60	C10AB05
		fenofibrate	9246P	Lipidil	fenofibrate 48 mg tablet, 60	C10AB05
		gemfibrozil	1453L	Lipigem	gemfibrozil 600 mg tablet, 60	C10AB04
		gemfibrozil	9248R	Lipigem	gemfibrozil 600 mg tablet, 60	C10AB04

## Sheet: Vasodilators+
	Vasodilators
	About:
	Organic Nitrates and other vasodilators used in cardiac diseases. Does not include peripheral vasodilator (phenoxybenzamine)
	Drug Group	Drug	Drug Code	Brands	Form and Strength	ATC Code
	Vasodilators and antianginal meds	glyceryl trinitrate	1516T	Transiderm-Nitro 50	glyceryl trinitrate 10 mg/24 hours patch, 30	C01DA02
		glyceryl trinitrate	8011P	Nitro-Dur 10	glyceryl trinitrate 10 mg/24 hours patch, 30	C01DA02
		glyceryl trinitrate	8028M	Minitran 10	glyceryl trinitrate 10 mg/24 hours patch, 30	C01DA02
		glyceryl trinitrate	8026K	Nitro-Dur 15	glyceryl trinitrate 15 mg/24 hours patch, 30	C01DA02
		glyceryl trinitrate	8119H	Minitran 15	glyceryl trinitrate 15 mg/24 hours patch, 30	C01DA02
		glyceryl trinitrate	11027J	Nitrostat	glyceryl trinitrate 300 microgram sublingual tablet, 100	C01DA02
		glyceryl trinitrate	11051P	Nitrostat	glyceryl trinitrate 300 microgram sublingual tablet, 100	C01DA02
		glyceryl trinitrate	3475X	Nitrolingual Pumpspray	glyceryl trinitrate 400 microgram/actuation oral spray, 200 actuations	C01DA02
		glyceryl trinitrate	8171C	Nitrolingual Pumpspray	glyceryl trinitrate 400 microgram/actuation oral spray, 200 actuations	C01DA02
		glyceryl trinitrate	1515R	Transiderm-Nitro 25	glyceryl trinitrate 5 mg/24 hours patch, 30	C01DA02
		glyceryl trinitrate	8010N	Nitro-Dur 5	glyceryl trinitrate 5 mg/24 hours patch, 30	C01DA02
		glyceryl trinitrate	8027L	Minitran 5	glyceryl trinitrate 5 mg/24 hours patch, 30	C01DA02
		glyceryl trinitrate	1459T	Nitrostat	glyceryl trinitrate 600 microgram sublingual tablet, 100	C01DA02
		glyceryl trinitrate	5108W	Nitrostat	glyceryl trinitrate 600 microgram sublingual tablet, 100	C01DA02
		isosorbide dinitrate	2587E	Sorbidin	Tablet 10 mg	C01DA08
		isosorbide dinitrate	2588F	Isordil Sublingual	isosorbide dinitrate 5 mg sublingual tablet, 100	C01DA08
		isosorbide mononitrate	8273K	Imdur 120 mg	isosorbide mononitrate 120 mg modified release tablet, 30	C01DA14
		isosorbide mononitrate	1558B	Duride	isosorbide mononitrate 60 mg modified release tablet, 30	C01DA14
		nicorandil	8228C	Ikotab	nicorandil 10 mg tablet, 60	C01DX16
		nicorandil	8229D	Ikotab	nicorandil 20 mg tablet, 60	C01DX16
		perhexiline	1822X	Pexsig	perhexiline maleate 100 mg tablet, 100	C01DX
	Perhexiline	perhexiline	1822X	Pexsig	perhexiline maleate 100 mg tablet, 100	C01DX

## Sheet: Antineoplastic
	Antineoplastic
	About:
	All drugs used to treat cancers. Does not include hormonal treatments
	Drug Group	Drug	Drug Code	Brands	Form and Strength	ATC Code
	Antineoplastic	arsenic	10691Q	Phenasen	Phenasen (arsenic trioxide 10 mg/10 mL) injection: concentrated, vial	L01XX27
		arsenic	10699D	Phenasen	Phenasen (arsenic trioxide 10 mg/10 mL) injection: concentrated, vial	L01XX27
		arsenic	4371C	Phenasen	Phenasen (arsenic trioxide 10 mg/10 mL) injection: concentrated, vial	L01XX27
		arsenic	7241D	Phenasen	Phenasen (arsenic trioxide 10 mg/10 mL) injection: concentrated, vial	L01XX27
		arsenic trioxide	5851Y	Phenasen	Injection concentrate 10 mg in 10 mL	L01XX27
		arsenic trioxide	9453M	Phenasen	Injection concentrate 10 mg in 10 mL	L01XX27
		axitinib	10539Q	Inlyta	axitinib 1 mg tablet, 28	L01XE17
		axitinib	10572K	Inlyta	axitinib 1 mg tablet, 28	L01XE17
		axitinib	10540R	Inlyta	axitinib 5 mg tablet, 28	L01XE17
		axitinib	10556N	Inlyta	axitinib 5 mg tablet, 28	L01XE17
		azacitidine	6100C	Vidaza	azacitidine 100 mg injection, 1 vial	L01BC07
		azacitidine	6138C	Vidaza	azacitidine 100 mg injection, 1 vial	L01BC07
		azacitidine	9597D	Vidaza	azacitidine 100 mg injection, 1 vial	L01BC07
		azacitidine	9598E	Vidaza	azacitidine 100 mg injection, 1 vial	L01BC07
		bendamustine	10760H	Ribomustin	Ribomustin 100 mg injection: powder for, 100 mg vial	L01AA09
		bendamustine	10763L	Ribomustin	Ribomustin 100 mg injection: powder for, 100 mg vial	L01AA09
		bevacizumab	10114H	Avastin	Avastin (bevacizumab 100 mg/4 mL) injection: concentrated, vial	L01XC07
		bevacizumab	10115J	Avastin	Avastin (bevacizumab 100 mg/4 mL) injection: concentrated, vial	L01XC07
		bevacizumab	10120P	Avastin	Avastin (bevacizumab 100 mg/4 mL) injection: concentrated, vial	L01XC07
		bevacizumab	10121Q	Avastin	Avastin (bevacizumab 100 mg/4 mL) injection: concentrated, vial	L01XC07
		bevacizumab	10881Q	Avastin	Avastin (bevacizumab 100 mg/4 mL) injection: concentrated, vial	L01XC07
		bevacizumab	10885X	Avastin	Avastin (bevacizumab 100 mg/4 mL) injection: concentrated, vial	L01XC07
		bevacizumab	4400N	Avastin	Avastin (bevacizumab 100 mg/4 mL) injection: concentrated, vial	L01XC07
		bevacizumab	7243F	Avastin	Avastin (bevacizumab 100 mg/4 mL) injection: concentrated, vial	L01XC07
		bevacizumab	5849W	Avastin	Solution for I.V. infusion 100 mg in 4 mL	L01XC07
		bevacizumab	9442Y	Avastin	Solution for I.V. infusion 100 mg in 4 mL	L01XC07
		bevacizumab	5850X	Avastin	Solution for I.V. infusion 400 mg in 16 mL	L01XC07
		bevacizumab	9443B	Avastin	Solution for I.V. infusion 400 mg in 16 mL	L01XC07
		bleomycin sulfate	4433H	Bleo 15K	Bleo 15K (bleomycin sulfate 15 000 international units) injection: powder for, vial	L01DC01
		bleomycin sulfate	7244G	Bleo 15K	Bleo 15K (bleomycin sulfate 15 000 international units) injection: powder for, vial	L01DC01
		bleomycin sulfate	4402Q	Bleo 15K	Bleo 15K, Powder for injection 15,000 i.u.	L01DC01
		bleomycin sulfate	7235T	Bleo 15K	Bleo 15K, Powder for injection 15,000 i.u.	L01DC01
		bleomycin sulfate	5903Q	Hospira Pty Limited	Powder for injection 15,000 i.u.	L01DC01
		bleomycin sulfate	2315W	Hospira Pty Limited	Powder for injection 15,000 i.u. (solvent required)	L01DC01
		bortezomib	5488W	Velcade	Powder for injection 3.5 mg (solvent required)	L01XX32
		bortezomib	5489X	Velcade	Powder for injection 3.5 mg (solvent required)	L01XX32
		bortezomib	9117W	Velcade	Powder for injection 3.5 mg (solvent required)	L01XX32
		bortezomib	9118X	Velcade	Powder for injection 3.5 mg (solvent required)	L01XX32
		bortezomib	4403R	Velcade	Velcade (bortezomib 1 mg) injection: powder for, vial	L01XX32
		bortezomib	4429D	Velcade	Velcade (bortezomib 1 mg) injection: powder for, vial	L01XX32
		bortezomib	4732C	Velcade	Velcade (bortezomib 1 mg) injection: powder for, vial	L01XX32
		bortezomib	7238Y	Velcade	Velcade (bortezomib 1 mg) injection: powder for, vial	L01XX32
		bortezomib	7274W	Velcade	Velcade (bortezomib 1 mg) injection: powder for, vial	L01XX32
		bortezomib	7275X	Velcade	Velcade (bortezomib 1 mg) injection: powder for, vial	L01XX32
		bortezomib	4706Q	Velcade	Velcade 3 mg injection: powder for, 3 mg vial	L01XX32
		bortezomib	4712B	Velcade	Velcade 3 mg injection: powder for, 3 mg vial	L01XX32
		bortezomib	4713C	Velcade	Velcade 3 mg injection: powder for, 3 mg vial	L01XX32
		bortezomib	4725Q	Velcade	Velcade 3 mg injection: powder for, 3 mg vial	L01XX32
		bortezomib	7268M	Velcade	Velcade 3 mg injection: powder for, 3 mg vial	L01XX32
		bortezomib	7269N	Velcade	Velcade 3 mg injection: powder for, 3 mg vial	L01XX32
		bortezomib	7271Q	Velcade	Velcade 3 mg injection: powder for, 3 mg vial	L01XX32
		bortezomib	7272R	Velcade	Velcade 3 mg injection: powder for, 3 mg vial	L01XX32
		brentuximab vedotin	10166C	Adcetris	Adcetris 50 mg injection: powder for, 50 mg vial	L01XC12
		brentuximab vedotin	10171H	Adcetris	Adcetris 50 mg injection: powder for, 50 mg vial	L01XC12
		brentuximab vedotin	10172J	Adcetris	Adcetris 50 mg injection: powder for, 50 mg vial	L01XC12
		brentuximab vedotin	10180T	Adcetris	Adcetris 50 mg injection: powder for, 50 mg vial	L01XC12
		busulfan	1128J	Myleran	busulfan 2 mg tablet, 100	L01AB01
		cabazitaxel	4376H	Jevtana	Jevtana CABAZITAXEL Concentrated injection 60 mg	L01CD04
		cabazitaxel	7236W	Jevtana	Jevtana CABAZITAXEL Concentrated injection 60 mg	L01CD04
		capecitabine	8361C	Capecitabine AN	capecitabine 150 mg tablet, 60	L01BC06
		capecitabine	8362D	Capecitabine Alphapharm	capecitabine 500 mg tablet, 120	L01BC06
		carboplatin	4309T	Hospira Pty Limited	Carboplatin (DBL) (carboplatin 150 mg/15 mL) injection: solution, vial	L01XA02
		carboplatin	7222D	Hospira Pty Limited	Carboplatin (DBL) (carboplatin 150 mg/15 mL) injection: solution, vial	L01XA02
		carboplatin	1161D	Hospira Pty Limited	Solution for I.V. injection 150 mg in 15 mL	L01XA02
		carboplatin	5907X	Hospira Pty Limited	Solution for I.V. injection 150 mg in 15 mL	L01XA02
		carboplatin	1162E	Hospira Pty Limited	Solution for I.V. injection 450 mg in 45 mL	L01XA02
		carboplatin	5908Y	Hospira Pty Limited	Solution for I.V. injection 450 mg in 45 mL	L01XA02
		carboplatin	1160C	Hospira Pty Limited	Solution for I.V. injection 50 mg in 5 mL	L01XA02
		carboplatin	5906W	Hospira Pty Limited	Solution for I.V. injection 50 mg in 5 mL	L01XA02
		carmustine	8898H	Gliadel	carmustine 7.7 mg implant, 8	L01AD01
		cetuximab	10262D	Erbitux	Erbitux (cetuximab 100 mg/20 mL) injection: solution, vial	L01XC06
		cetuximab	10265G	Erbitux	Erbitux (cetuximab 100 mg/20 mL) injection: solution, vial	L01XC06
		cetuximab	4312Y	Erbitux	Erbitux (cetuximab 100 mg/20 mL) injection: solution, vial	L01XC06
		cetuximab	4435K	Erbitux	Erbitux (cetuximab 100 mg/20 mL) injection: solution, vial	L01XC06
		cetuximab	4436L	Erbitux	Erbitux (cetuximab 100 mg/20 mL) injection: solution, vial	L01XC06
		cetuximab	4731B	Erbitux	Erbitux (cetuximab 100 mg/20 mL) injection: solution, vial	L01XC06
		cetuximab	7223E	Erbitux	Erbitux (cetuximab 100 mg/20 mL) injection: solution, vial	L01XC06
		cetuximab	7240C	Erbitux	Erbitux (cetuximab 100 mg/20 mL) injection: solution, vial	L01XC06
		cetuximab	7242E	Erbitux	Erbitux (cetuximab 100 mg/20 mL) injection: solution, vial	L01XC06
		cetuximab	7273T	Erbitux	Erbitux (cetuximab 100 mg/20 mL) injection: solution, vial	L01XC06
		cetuximab	5447Q	Erbitux	Solution for I.V. infusion 100 mg in 20 mL	L01XC06
		cetuximab	5599Q	Erbitux	Solution for I.V. infusion 100 mg in 20 mL	L01XC06
		cetuximab	5836E	Erbitux	Solution for I.V. infusion 100 mg in 20 mL	L01XC06
		cetuximab	5838G	Erbitux	Solution for I.V. infusion 100 mg in 20 mL	L01XC06
		cetuximab	9136W	Erbitux	Solution for I.V. infusion 100 mg in 20 mL	L01XC06
		cetuximab	9138Y	Erbitux	Solution for I.V. infusion 100 mg in 20 mL	L01XC06
		cetuximab	5831X	Erbitux	Solution for I.V. infusion 100 mg in 50 mL	L01XC06
		cetuximab	5832Y	Erbitux	Solution for I.V. infusion 100 mg in 50 mL	L01XC06
		cetuximab	9097T	Erbitux	Solution for I.V. infusion 100 mg in 50 mL	L01XC06
		cetuximab	9098W	Erbitux	Solution for I.V. infusion 100 mg in 50 mL	L01XC06
		cetuximab	5448R	Erbitux	Solution for I.V. infusion 500 mg in 100 mL	L01XC06
		cetuximab	5600R	Erbitux	Solution for I.V. infusion 500 mg in 100 mL	L01XC06
		cetuximab	5837F	Erbitux	Solution for I.V. infusion 500 mg in 100 mL	L01XC06
		cetuximab	5839H	Erbitux	Solution for I.V. infusion 500 mg in 100 mL	L01XC06
		cetuximab	9137X	Erbitux	Solution for I.V. infusion 500 mg in 100 mL	L01XC06
		cetuximab	9139B	Erbitux	Solution for I.V. infusion 500 mg in 100 mL	L01XC06
		chlorambucil	1163F	Leukeran	chlorambucil 2 mg tablet, 25	L01AA02
		cisplatin	4319H	Hospira Pty Limited	Cisplatin (DBL) (cisplatin 100 mg/100 mL) injection: solution, vial	L01XA01
		cisplatin	7224F	Hospira Pty Limited	Cisplatin (DBL) (cisplatin 100 mg/100 mL) injection: solution, vial	L01XA01
		cisplatin	2578Q	Pfizer Australia Pty Ltd	I.V. injection 10 mg in 10 mL	L01XA01
		cisplatin	5909B	Pfizer Australia Pty Ltd	I.V. injection 10 mg in 10 mL	L01XA01
		cisplatin	2580T	Hospira Pty Limited	I.V. injection 100 mg in 100 mL	L01XA01
		cisplatin	5911D	Hospira Pty Limited	I.V. injection 100 mg in 100 mL	L01XA01
		cisplatin	2579R	Hospira Pty Limited	I.V. injection 50 mg in 50 mL	L01XA01
		cisplatin	5910C	Hospira Pty Limited	I.V. injection 50 mg in 50 mL	L01XA01
		cladribine	5889Y	Litak	Injection 10 mg in 5 mL	L01BB04
		cladribine	8800E	Litak	Injection 10 mg in 5 mL	L01BB04
		cladribine	4326Q	Leustatin	Leustatin (cladribine 10 mg/10 mL) injection: concentrated, vial	L01BB04
		cladribine	7225G	Leustatin	Leustatin (cladribine 10 mg/10 mL) injection: concentrated, vial	L01BB04
		cladribine	1811H	Leustatin	Solution for I.V. infusion 10 mg in 10 mL	L01BB04
		cladribine	5912E	Leustatin	Solution for I.V. infusion 10 mg in 10 mL	L01BB04
		crizotinib	10323H	Xalkori	crizotinib 200 mg capsule, 60	L01XE16
		crizotinib	10322G	Xalkori	crizotinib 250 mg capsule, 60	L01XE16
		cyclophosphamide	4327R	Endoxan	Endoxan (cyclophosphamide (as monohydrate) 1 g) injection: powder for, vial	L01AA01
		cyclophosphamide	7226H	Endoxan	Endoxan (cyclophosphamide (as monohydrate) 1 g) injection: powder for, vial	L01AA01
		cyclophosphamide	5915H	Endoxan	Powder for injection 1 g	L01AA01
		cyclophosphamide	1080W	Endoxan	Powder for injection 1 g (solvent required)	L01AA01
		cyclophosphamide	5916J	Endoxan	Powder for injection 2 g	L01AA01
		cyclophosphamide	1031G	Endoxan	Powder for injection 2 g (solvent required)	L01AA01
		cyclophosphamide	5914G	Endoxan	Powder for injection 500 mg	L01AA01
		cyclophosphamide	1079T	Endoxan	Powder for injection 500 mg (solvent required)	L01AA01
		cyclophosphamide	10026Q	Endoxan	cyclophosphamide 50 mg tablet, 50	L01AA01
		cyclophosphamide	1266P	Cycloblastin	cyclophosphamide 50 mg tablet, 50	L01AA01
		cytarabine	4357H	Pfizer Australia Pty Ltd	Cytarabine (Pfizer (Perth)) (cytarabine 100 mg/5 mL) injection: solution, vial	L01BC01
		cytarabine	7227J	Pfizer Australia Pty Ltd	Cytarabine (Pfizer (Perth)) (cytarabine 100 mg/5 mL) injection: solution, vial	L01BC01
		cytarabine	2884T	Pfizer Australia Pty Ltd	Injection 100 mg in 5 mL	L01BC01
		cytarabine	5918L	Pfizer Australia Pty Ltd	Injection 100 mg in 5 mL	L01BC01
		dabrafenib	2954L	Tafinlar	dabrafenib 50 mg capsule, 120	L01XE23
		dabrafenib	2963Y	Tafinlar	dabrafenib 50 mg capsule, 120	L01XE23
		dabrafenib	10003L	Tafinlar	dabrafenib 75 mg capsule, 120	L01XE23
		dabrafenib	2846T	Tafinlar	dabrafenib 75 mg capsule, 120	L01XE23
		dasatinib	9341P	Sprycel	Tablet 100 mg	L01XE06
		dasatinib	9282M	Sprycel	Tablet 20 mg	L01XE06
		dasatinib	9283N	Sprycel	Tablet 50 mg	L01XE06
		dasatinib	9284P	Sprycel	Tablet 70 mg	L01XE06
		dasatinib	1416M	Sprycel	dasatinib 100 mg tablet, 30	L01XE06
		dasatinib	9342Q	Sprycel	dasatinib 100 mg tablet, 30	L01XE06
		dasatinib	9343R	Sprycel	dasatinib 100 mg tablet, 30	L01XE06
		dasatinib	1354G	Sprycel	dasatinib 20 mg tablet, 60	L01XE06
		dasatinib	2478K	Sprycel	dasatinib 20 mg tablet, 60	L01XE06
		dasatinib	9125G	Sprycel	dasatinib 20 mg tablet, 60	L01XE06
		dasatinib	1381Q	Sprycel	dasatinib 50 mg tablet, 60	L01XE06
		dasatinib	2482P	Sprycel	dasatinib 50 mg tablet, 60	L01XE06
		dasatinib	9126H	Sprycel	dasatinib 50 mg tablet, 60	L01XE06
		dasatinib	1415L	Sprycel	dasatinib 70 mg tablet, 60	L01XE06
		dasatinib	2485T	Sprycel	dasatinib 70 mg tablet, 60	L01XE06
		dasatinib	9127J	Sprycel	dasatinib 70 mg tablet, 60	L01XE06
		docetaxel	5271K	Taxotere	Injection set containing 1 single use vial concentrate for I.V. infusion 20 mg (anhydrous) in 0.5 mL with solvent	L01CD02
		docetaxel	5430T	Taxotere	Injection set containing 1 single use vial concentrate for I.V. infusion 20 mg (anhydrous) in 0.5 mL with solvent	L01CD02
		docetaxel	5595L	Taxotere	Injection set containing 1 single use vial concentrate for I.V. infusion 20 mg (anhydrous) in 0.5 mL with solvent	L01CD02
		docetaxel	5812X	Taxotere	Injection set containing 1 single use vial concentrate for I.V. infusion 20 mg (anhydrous) in 0.5 mL with solvent	L01CD02
		docetaxel	5842L	Taxotere	Injection set containing 1 single use vial concentrate for I.V. infusion 20 mg (anhydrous) in 0.5 mL with solvent	L01CD02
		docetaxel	5866R	Taxotere	Injection set containing 1 single use vial concentrate for I.V. infusion 20 mg (anhydrous) in 0.5 mL with solvent	L01CD02
		docetaxel	5921P	Taxotere	Injection set containing 1 single use vial concentrate for I.V. infusion 20 mg (anhydrous) in 0.5 mL with solvent	L01CD02
		docetaxel	8071T	Taxotere	Injection set containing 1 single use vial concentrate for I.V. infusion 20 mg (anhydrous) in 0.5 mL with solvent	L01CD02
		docetaxel	8988C	Taxotere	Injection set containing 1 single use vial concentrate for I.V. infusion 20 mg (anhydrous) in 0.5 mL with solvent	L01CD02
		docetaxel	9291B	Taxotere	Injection set containing 1 single use vial concentrate for I.V. infusion 20 mg (anhydrous) in 0.5 mL with solvent	L01CD02
		docetaxel	5273M	Taxotere	Injection set containing 1 single use vial concentrate for I.V. infusion 80 mg (anhydrous) in 2 mL with solvent	L01CD02
		docetaxel	5433Y	Taxotere	Injection set containing 1 single use vial concentrate for I.V. infusion 80 mg (anhydrous) in 2 mL with solvent	L01CD02
		docetaxel	5598P	Taxotere	Injection set containing 1 single use vial concentrate for I.V. infusion 80 mg (anhydrous) in 2 mL with solvent	L01CD02
		docetaxel	5814B	Taxotere	Injection set containing 1 single use vial concentrate for I.V. infusion 80 mg (anhydrous) in 2 mL with solvent	L01CD02
		docetaxel	5869X	Taxotere	Injection set containing 1 single use vial concentrate for I.V. infusion 80 mg (anhydrous) in 2 mL with solvent	L01CD02
		docetaxel	5922Q	Taxotere	Injection set containing 1 single use vial concentrate for I.V. infusion 80 mg (anhydrous) in 2 mL with solvent	L01CD02
		docetaxel	8074Y	Taxotere	Injection set containing 1 single use vial concentrate for I.V. infusion 80 mg (anhydrous) in 2 mL with solvent	L01CD02
		docetaxel	8991F	Taxotere	Injection set containing 1 single use vial concentrate for I.V. infusion 80 mg (anhydrous) in 2 mL with solvent	L01CD02
		docetaxel	10148D	Oncotaxel 140	Oncotaxel (docetaxel 140 mg/7 mL) injection: concentrated, vial	L01CD02
		docetaxel	10158P	Oncotaxel 140	Oncotaxel (docetaxel 140 mg/7 mL) injection: concentrated, vial	L01CD02
		docetaxel	5581R	Oncotaxel 140	Oncotaxel (docetaxel 140 mg/7 mL) injection: concentrated, vial	L01CD02
		docetaxel	5582T	Oncotaxel 140	Oncotaxel (docetaxel 140 mg/7 mL) injection: concentrated, vial	L01CD02
		docetaxel	5583W	Oncotaxel 140	Oncotaxel (docetaxel 140 mg/7 mL) injection: concentrated, vial	L01CD02
		docetaxel	5584X	Oncotaxel 140	Oncotaxel (docetaxel 140 mg/7 mL) injection: concentrated, vial	L01CD02
		docetaxel	5585Y	Oncotaxel 140	Oncotaxel (docetaxel 140 mg/7 mL) injection: concentrated, vial	L01CD02
		docetaxel	7281F	Oncotaxel 140	Oncotaxel (docetaxel 140 mg/7 mL) injection: concentrated, vial	L01CD02
		docetaxel	7282G	Oncotaxel 140	Oncotaxel (docetaxel 140 mg/7 mL) injection: concentrated, vial	L01CD02
		docetaxel	7283H	Oncotaxel 140	Oncotaxel (docetaxel 140 mg/7 mL) injection: concentrated, vial	L01CD02
		docetaxel	7284J	Oncotaxel 140	Oncotaxel (docetaxel 140 mg/7 mL) injection: concentrated, vial	L01CD02
		docetaxel	7285K	Oncotaxel 140	Oncotaxel (docetaxel 140 mg/7 mL) injection: concentrated, vial	L01CD02
		docetaxel	5149B	Docetaxel SUN	Powder for I.V. infusion 20 mg with solvent	L01CD02
		docetaxel	5591G	Docetaxel SUN	Powder for I.V. infusion 20 mg with solvent	L01CD02
		docetaxel	5156J	Docetaxel SUN	Powder for I.V. infusion 80 mg with solvent	L01CD02
		docetaxel	5592H	Docetaxel SUN	Powder for I.V. infusion 80 mg with solvent	L01CD02
		docetaxel	5274N	Oncotaxel 140	Solution concentrate for I.V. infusion 140 mg in 7 mL	L01CD02
		docetaxel	5275P	Oncotaxel 140	Solution concentrate for I.V. infusion 140 mg in 7 mL	L01CD02
		docetaxel	5809R	Oncotaxel 140	Solution concentrate for I.V. infusion 140 mg in 7 mL	L01CD02
		docetaxel	5810T	Oncotaxel 140	Solution concentrate for I.V. infusion 140 mg in 7 mL	L01CD02
		docetaxel	5862M	DBL Docetaxel Concentrated Injection	Solution concentrate for I.V. infusion 160 mg in 16 mL	L01CD02
		docetaxel	5957M	DBL Docetaxel Concentrated Injection	Solution concentrate for I.V. infusion 160 mg in 16 mL	L01CD02
		docetaxel	8967Y	DBL Docetaxel Concentrated Injection	Solution concentrate for I.V. infusion 160 mg in 16 mL	L01CD02
		docetaxel	8992G	DBL Docetaxel Concentrated Injection	Solution concentrate for I.V. infusion 160 mg in 16 mL	L01CD02
		docetaxel	5270J	Taxotere	Solution concentrate for I.V. infusion 20 mg in 1 mL	L01CD02
		docetaxel	5428Q	Taxotere	Solution concentrate for I.V. infusion 20 mg in 1 mL	L01CD02
		docetaxel	5462L	Taxotere	Solution concentrate for I.V. infusion 20 mg in 1 mL	L01CD02
		docetaxel	5463M	Taxotere	Solution concentrate for I.V. infusion 20 mg in 1 mL	L01CD02
		docetaxel	5593J	Taxotere	Solution concentrate for I.V. infusion 20 mg in 1 mL	L01CD02
		docetaxel	5811W	Taxotere	Solution concentrate for I.V. infusion 20 mg in 1 mL	L01CD02
		docetaxel	5854D	Taxotere	Solution concentrate for I.V. infusion 20 mg in 1 mL	L01CD02
		docetaxel	5855E	Taxotere	Solution concentrate for I.V. infusion 20 mg in 1 mL	L01CD02
		docetaxel	5864P	Taxotere	Solution concentrate for I.V. infusion 20 mg in 1 mL	L01CD02
		docetaxel	8986Y	Taxotere	Solution concentrate for I.V. infusion 20 mg in 1 mL	L01CD02
		docetaxel	5429R	DBL Docetaxel Concentrated Injection	Solution concentrate for I.V. infusion 20 mg in 2 mL	L01CD02
		docetaxel	5485Q	DBL Docetaxel Concentrated Injection	Solution concentrate for I.V. infusion 20 mg in 2 mL	L01CD02
		docetaxel	5486R	DBL Docetaxel Concentrated Injection	Solution concentrate for I.V. infusion 20 mg in 2 mL	L01CD02
		docetaxel	5594K	DBL Docetaxel Concentrated Injection	Solution concentrate for I.V. infusion 20 mg in 2 mL	L01CD02
		docetaxel	5859J	DBL Docetaxel Concentrated Injection	Solution concentrate for I.V. infusion 20 mg in 2 mL	L01CD02
		docetaxel	5860K	DBL Docetaxel Concentrated Injection	Solution concentrate for I.V. infusion 20 mg in 2 mL	L01CD02
		docetaxel	5865Q	DBL Docetaxel Concentrated Injection	Solution concentrate for I.V. infusion 20 mg in 2 mL	L01CD02
		docetaxel	8987B	DBL Docetaxel Concentrated Injection	Solution concentrate for I.V. infusion 20 mg in 2 mL	L01CD02
		docetaxel	5272L	Taxotere	Solution concentrate for I.V. infusion 80 mg in 4 mL	L01CD02
		docetaxel	5431W	Taxotere	Solution concentrate for I.V. infusion 80 mg in 4 mL	L01CD02
		docetaxel	5464N	Taxotere	Solution concentrate for I.V. infusion 80 mg in 4 mL	L01CD02
		docetaxel	5596M	Taxotere	Solution concentrate for I.V. infusion 80 mg in 4 mL	L01CD02
		docetaxel	5813Y	Taxotere	Solution concentrate for I.V. infusion 80 mg in 4 mL	L01CD02
		docetaxel	5856F	Taxotere	Solution concentrate for I.V. infusion 80 mg in 4 mL	L01CD02
		docetaxel	5867T	Taxotere	Solution concentrate for I.V. infusion 80 mg in 4 mL	L01CD02
		docetaxel	8989D	Taxotere	Solution concentrate for I.V. infusion 80 mg in 4 mL	L01CD02
		docetaxel	5432X	DBL Docetaxel Concentrated Injection	Solution concentrate for I.V. infusion 80 mg in 8 mL	L01CD02
		docetaxel	5487T	DBL Docetaxel Concentrated Injection	Solution concentrate for I.V. infusion 80 mg in 8 mL	L01CD02
		docetaxel	5597N	DBL Docetaxel Concentrated Injection	Solution concentrate for I.V. infusion 80 mg in 8 mL	L01CD02
		docetaxel	5861L	DBL Docetaxel Concentrated Injection	Solution concentrate for I.V. infusion 80 mg in 8 mL	L01CD02
		docetaxel	5868W	DBL Docetaxel Concentrated Injection	Solution concentrate for I.V. infusion 80 mg in 8 mL	L01CD02
		docetaxel	8990E	DBL Docetaxel Concentrated Injection	Solution concentrate for I.V. infusion 80 mg in 8 mL	L01CD02
		doxorubicin	4361M	Doxorubicin SZ	Doxorubicin Hydrochloride (SZ) (doxorubicin hydrochloride 10 mg/5 mL) injection: concentrated, vial	L01DB01
		doxorubicin	7229L	Doxorubicin SZ	Doxorubicin Hydrochloride (SZ) (doxorubicin hydrochloride 10 mg/5 mL) injection: concentrated, vial	L01DB01
		doxorubicin hydrochloride	1336H	Hospira Pty Limited	Solution for I.V. injection or intravesical administration 10 mg in 5 mL	L01DB01
		doxorubicin hydrochloride	5925W	Hospira Pty Limited	Solution for I.V. injection or intravesical administration 10 mg in 5 mL	L01DB01
		doxorubicin hydrochloride	5879K	Doxorubicin Ebewe	Solution for I.V. injection or intravesical administration 100 mg in 50 mL	L01DB01
		doxorubicin hydrochloride	8827N	Doxorubicin Ebewe	Solution for I.V. injection or intravesical administration 100 mg in 50 mL	L01DB01
		doxorubicin hydrochloride	1340M	Adriamycin Solution	Solution for I.V. injection or intravesical administration 20 mg in 10 mL	L01DB01
		doxorubicin hydrochloride	5926X	Adriamycin Solution	Solution for I.V. injection or intravesical administration 20 mg in 10 mL	L01DB01
		doxorubicin hydrochloride	5880L	Doxorubicin Ebewe	Solution for I.V. injection or intravesical administration 200 mg in 100 mL	L01DB01
		doxorubicin hydrochloride	8828P	Doxorubicin Ebewe	Solution for I.V. injection or intravesical administration 200 mg in 100 mL	L01DB01
		doxorubicin hydrochloride	1342P	Hospira Pty Limited	Solution for I.V. injection or intravesical administration 50 mg in 25 mL	L01DB01
		doxorubicin hydrochloride	5927Y	Hospira Pty Limited	Solution for I.V. injection or intravesical administration 50 mg in 25 mL	L01DB01
		doxorubicin hydrochloride, pegylated liposomal	5891C	Caelyx	Suspension for I.V. infusion 20 mg in 10 mL	L01DB01
		doxorubicin hydrochloride, pegylated liposomal	8569B	Caelyx	Suspension for I.V. infusion 20 mg in 10 mL	L01DB01
		doxorubicin hydrochloride, pegylated liposomal	5892D	Caelyx	Suspension for I.V. infusion 50 mg in 25 mL	L01DB01
		doxorubicin hydrochloride, pegylated liposomal	8570C	Caelyx	Suspension for I.V. infusion 50 mg in 25 mL	L01DB01
		doxorubicin hydrochloride-pegylated liposomal	4360L	Caelyx	Caelyx (doxorubicin hydrochloride-pegylated liposomal 20 mg/10 mL) injection: modified release, vial	L01DB01
		doxorubicin hydrochloride-pegylated liposomal	4364Q	Caelyx	Caelyx (doxorubicin hydrochloride-pegylated liposomal 20 mg/10 mL) injection: modified release, vial	L01DB01
		doxorubicin hydrochloride-pegylated liposomal	7228K	Caelyx	Caelyx (doxorubicin hydrochloride-pegylated liposomal 20 mg/10 mL) injection: modified release, vial	L01DB01
		doxorubicin hydrochloride-pegylated liposomal	7230M	Caelyx	Caelyx (doxorubicin hydrochloride-pegylated liposomal 20 mg/10 mL) injection: modified release, vial	L01DB01
		doxorubicin hydrochloride-pegylated liposomal	5705G	Caelyx	doxorubicin hydrochloride-pegylated liposomal 20 mg/10 mL injection, 1 x 10 mL vial	L01DB01
		doxorubicin hydrochloride-pegylated liposomal	6249X	Caelyx	doxorubicin hydrochloride-pegylated liposomal 20 mg/10 mL injection, 1 x 10 mL vial	L01DB01
		epirubicin	4375G	Epirubicin ACT	Epirubicin Hydrochloride (ACT) (epirubicin hydrochloride 100 mg/50 mL) injection: concentrated, vial	L01DB03
		epirubicin	7231N	Epirubicin ACT	Epirubicin Hydrochloride (ACT) (epirubicin hydrochloride 100 mg/50 mL) injection: concentrated, vial	L01DB03
		epirubicin hydrochloride	5871B		Powder for injection 50 mg	L01DB03
		epirubicin hydrochloride	9018P		Powder for injection 50 mg	L01DB03
		epirubicin hydrochloride	1375J	Pharmorubicin Solution	Solution for injection 10 mg in 5 mL	L01DB03
		epirubicin hydrochloride	5928B	Pharmorubicin Solution	Solution for injection 10 mg in 5 mL	L01DB03
		epirubicin hydrochloride	5885R	Hospira Pty Limited	Solution for injection 100 mg in 50 mL	L01DB03
		epirubicin hydrochloride	8817C	Hospira Pty Limited	Solution for injection 100 mg in 50 mL	L01DB03
		epirubicin hydrochloride	1376K	Pharmorubicin Solution	Solution for injection 20 mg in 10 mL	L01DB03
		epirubicin hydrochloride	5929C	Pharmorubicin Solution	Solution for injection 20 mg in 10 mL	L01DB03
		epirubicin hydrochloride	5884Q	Epirubicin Ebewe	Solution for injection 200 mg in 100 mL	L01DB03
		epirubicin hydrochloride	8858F	Epirubicin Ebewe	Solution for injection 200 mg in 100 mL	L01DB03
		epirubicin hydrochloride	1377L	Hospira Pty Limited	Solution for injection 50 mg in 25 mL	L01DB03
		epirubicin hydrochloride	5930D	Hospira Pty Limited	Solution for injection 50 mg in 25 mL	L01DB03
		eribulin	10140Q	Halaven	Halaven 1 mg/2 mL injection: solution, 2 mL vial	L01XX41
		eribulin	10144X	Halaven	Halaven 1 mg/2 mL injection: solution, 2 mL vial	L01XX41
		erlotinib	10019H	Tarceva	erlotinib 100 mg tablet, 30	L01XE03
		erlotinib	10020J	Tarceva	erlotinib 100 mg tablet, 30	L01XE03
		erlotinib	9167L	Tarceva	erlotinib 100 mg tablet, 30	L01XE03
		erlotinib	10014C	Tarceva	erlotinib 150 mg tablet, 30	L01XE03
		erlotinib	10025P	Tarceva	erlotinib 150 mg tablet, 30	L01XE03
		erlotinib	9168M	Tarceva	erlotinib 150 mg tablet, 30	L01XE03
		erlotinib	10022L	Tarceva	erlotinib 25 mg tablet, 30	L01XE03
		erlotinib	10028T	Tarceva	erlotinib 25 mg tablet, 30	L01XE03
		erlotinib	9166K	Tarceva	erlotinib 25 mg tablet, 30	L01XE03
		etoposide	4428C	Etopophos	Etopophos 100 mg injection: powder for, 1 vial	L01CB01
		etoposide	7237X	Etopophos	Etopophos 100 mg injection: powder for, 1 vial	L01CB01
		etoposide	5933G	Etopophos	Powder for I.V. infusion 1 g (as phosphate)	L01CB01
		etoposide	8515E	Etopophos	Powder for I.V. infusion 1 g (as phosphate)	L01CB01
		etoposide	5932F	Etopophos	Powder for I.V. infusion 100 mg (as phosphate)	L01CB01
		etoposide	8120J	Etopophos	Powder for I.V. infusion 100 mg (as phosphate)	L01CB01
		etoposide	1390E	Hospira Pty Limited	Solution for I.V. infusion 100 mg in 5 mL	L01CB01
		etoposide	5931E	Hospira Pty Limited	Solution for I.V. infusion 100 mg in 5 mL	L01CB01
		etoposide	1389D	Vepesid	etoposide 100 mg capsule, 10	L01CB01
		etoposide	1396L	Vepesid	etoposide 50 mg capsule, 20	L01CB01
		everolimus	10132G	Afinitor	everolimus 10 mg tablet, 30	L01XE10
		everolimus	10135K	Afinitor	everolimus 10 mg tablet, 30	L01XE10
		everolimus	2985D	Afinitor	everolimus 10 mg tablet, 30	L01XE10
		everolimus	2818H	Afinitor	everolimus 2.5 mg tablet, 30	L01XE10
		everolimus	10131F	Afinitor	everolimus 5 mg tablet, 30	L01XE10
		everolimus	10133H	Afinitor	everolimus 5 mg tablet, 30	L01XE10
		everolimus	2819J	Afinitor	everolimus 5 mg tablet, 30	L01XE10
		fludarabine	4393F	Fludarabine ACT	Fludarabine Phosphate (Act) 50 mg injection: powder for, 50 mg vial	L01BB05
		fludarabine	7233Q	Fludarabine ACT	Fludarabine Phosphate (Act) 50 mg injection: powder for, 50 mg vial	L01BB05
		fludarabine	9184J	Fludara	fludarabine phosphate 10 mg tablet, 20	L01BB05
		fludarabine phosphate	5840J	Fludara	Powder for I.V. injection 50 mg	L01BB05
		fludarabine phosphate	9185K	Fludara	Powder for I.V. injection 50 mg	L01BB05
		fludarabine phosphate	5841K	Fludarabine Ebewe	Solution for I.V. injection 50 mg in 2 mL	L01BB05
		fludarabine phosphate	9207N	Fludarabine Ebewe	Solution for I.V. injection 50 mg in 2 mL	L01BB05
		fluorouracil	4394G	DBL Fluorouracil Injection BP	Fluorouracil (DBL) (fluorouracil 1 g/20 mL) injection: solution, vial	L01BC02
		fluorouracil	4431F	DBL Fluorouracil Injection BP	Fluorouracil (DBL) (fluorouracil 1 g/20 mL) injection: solution, vial	L01BC02
		fluorouracil	7234R	DBL Fluorouracil Injection BP	Fluorouracil (DBL) (fluorouracil 1 g/20 mL) injection: solution, vial	L01BC02
		fluorouracil	7239B	DBL Fluorouracil Injection BP	Fluorouracil (DBL) (fluorouracil 1 g/20 mL) injection: solution, vial	L01BC02
		fluorouracil	5872C	Fluorouracil Ebewe	Injection 1000 mg in 20 mL	L01BC02
		fluorouracil	9005Y	Fluorouracil Ebewe	Injection 1000 mg in 20 mL	L01BC02
		fluorouracil	5807P	Fluorouracil Ebewe	Injection 2500 mg in 50 mL	L01BC02
		fluorouracil	8995K	Fluorouracil Ebewe	Injection 2500 mg in 50 mL	L01BC02
		fluorouracil	2528C	Hospira Pty Limited	Injection 500 mg in 10 mL	L01BC02
		fluorouracil	5935J	Hospira Pty Limited	Injection 500 mg in 10 mL	L01BC02
		fluorouracil	5808Q	Fluorouracil Ebewe	Injection 5000 mg in 100 mL	L01BC02
		fluorouracil	8996L	Fluorouracil Ebewe	Injection 5000 mg in 100 mL	L01BC02
		fluorouracil	4222F	Efudix	fluorouracil 5% cream, 20 g	L01BC02
		fotemustine	4437M	Muphoran	Muphoran (fotemustine 208 mg) injection: powder for, vial	L01AD05
		fotemustine	7245H	Muphoran	Muphoran (fotemustine 208 mg) injection: powder for, vial	L01AD05
		fotemustine	5900M	Muphoran	Powder for injection 208 mg with solvent	L01AD05
		fotemustine	8786K	Muphoran	Powder for injection 208 mg with solvent	L01AD05
		gefitinib	8769M	Iressa	gefitinib 250 mg tablet, 30	L01XE02
		gemcitabine	4439P	Gemaccord	Gemaccord (gemcitabine (as hydrochloride) 1 g) injection: powder for, vial	L01BC05
		gemcitabine	7246J	Gemaccord	Gemaccord (gemcitabine (as hydrochloride) 1 g) injection: powder for, vial	L01BC05
		gemcitabine	5937L	Gemzar	Powder for I.V. infusion 1 g (as hydrochloride)	L01BC05
		gemcitabine	8050Q	Gemzar	Powder for I.V. infusion 1 g (as hydrochloride)	L01BC05
		gemcitabine	5845P	DBL Gemcitabine for Injection	Powder for I.V. infusion 2 g (as hydrochloride)	L01BC05
		gemcitabine	9414L	DBL Gemcitabine for Injection	Powder for I.V. infusion 2 g (as hydrochloride)	L01BC05
		gemcitabine	5936K	Gemzar	Powder for I.V. infusion 200 mg (as hydrochloride)	L01BC05
		gemcitabine	8049P	Gemzar	Powder for I.V. infusion 200 mg (as hydrochloride)	L01BC05
		gemcitabine	1144F	Gemcitabine Ebewe	Solution concentrate for I.V. infusion 1 g (as hydrochloride) in 25 mL	L01BC05
		gemcitabine	5844N	Gemcitabine Ebewe	Solution concentrate for I.V. infusion 1000 mg (as hydrochloride) in 100 mL	L01BC05
		gemcitabine	9402W	Gemcitabine Ebewe	Solution concentrate for I.V. infusion 1000 mg (as hydrochloride) in 100 mL	L01BC05
		gemcitabine	1145G	Gemcitabine Ebewe	Solution concentrate for I.V. infusion 2 g (as hydrochloride) in 50 mL	L01BC05
		gemcitabine	5843M	Gemcitabine Ebewe	Solution concentrate for I.V. infusion 200 mg (as hydrochloride) in 20 mL	L01BC05
		gemcitabine	9401T	Gemcitabine Ebewe	Solution concentrate for I.V. infusion 200 mg (as hydrochloride) in 20 mL	L01BC05
		gemcitabine	1134Q	Gemcitabine Ebewe	Solution concentrate for I.V. infusion 200 mg (as hydrochloride) in 5 mL	L01BC05
		gemcitabine	5852B	Gemcitabine Ebewe	Solution concentrate for I.V. infusion 500 mg (as hydrochloride) in 50 mL	L01BC05
		gemcitabine	9463C	Gemcitabine Ebewe	Solution concentrate for I.V. infusion 500 mg (as hydrochloride) in 50 mL	L01BC05
		gemcitabine	5587C	DBL Gemcitabine Injection	Solution for injection 1 g (as hydrochloride) in 26.3 mL	L01BC05
		gemcitabine	5588D	DBL Gemcitabine Injection	Solution for injection 2 g (as hydrochloride) in 52.6 mL	L01BC05
		gemcitabine	5586B	DBL Gemcitabine Injection	Solution for injection 200 mg (as hydrochloride) in 5.3 mL	L01BC05
		hydroxyurea	3093T	Hydrea	hydroxyurea 500 mg capsule, 100	L01XX05
		idarubicin	4440Q	Zavedos Solution	Zavedos (idarubicin hydrochloride 10 mg/10 mL) injection: solution, vial	L01DB06
		idarubicin	7247K	Zavedos Solution	Zavedos (idarubicin hydrochloride 10 mg/10 mL) injection: solution, vial	L01DB06
		idarubicin	2448W	Zavedos	idarubicin hydrochloride 10 mg capsule, 1	L01DB06
		idarubicin	2446R	Zavedos	idarubicin hydrochloride 5 mg capsule, 1	L01DB06
		idarubicin hydrochloride	5939N	Zavedos	Capsule 10 mg	L01DB06
		idarubicin hydrochloride	5938M	Zavedos	Capsule 5 mg	L01DB06
		idarubicin hydrochloride	5942R	Zavedos Solution	Solution for I.V. injection 10 mg in 10 mL	L01DB06
		idarubicin hydrochloride	8531B	Zavedos Solution	Solution for I.V. injection 10 mg in 10 mL	L01DB06
		idarubicin hydrochloride	5941Q	Zavedos Solution	Solution for I.V. injection 5 mg in 5 mL	L01DB06
		idarubicin hydrochloride	8530Y	Zavedos Solution	Solution for I.V. injection 5 mg in 5 mL	L01DB06
		ifosfamide	4448D	Holoxan	Holoxan (ifosfamide 1 g) injection: powder for, vial	L01AA06
		ifosfamide	7248L	Holoxan	Holoxan (ifosfamide 1 g) injection: powder for, vial	L01AA06
		ifosfamide	5943T	Holoxan	Powder for I.V. injection 1 g	L01AA06
		ifosfamide	8076C	Holoxan	Powder for I.V. injection 1 g	L01AA06
		ifosfamide	5944W	Holoxan	Powder for I.V. injection 2 g	L01AA06
		ifosfamide	8077D	Holoxan	Powder for I.V. injection 2 g	L01AA06
		imatinib	10915L	IMATINIB AN	imatinib 100 mg capsule, 60	L01XE01
		imatinib	10918P	IMATINIB AN	imatinib 100 mg capsule, 60	L01XE01
		imatinib	10920R	IMATINIB AN	imatinib 100 mg capsule, 60	L01XE01
		imatinib	10924Y	IMATINIB AN	imatinib 100 mg capsule, 60	L01XE01
		imatinib	10940T	IMATINIB AN	imatinib 100 mg capsule, 60	L01XE01
		imatinib	10941W	IMATINIB AN	imatinib 100 mg capsule, 60	L01XE01
		imatinib	10942X	IMATINIB AN	imatinib 100 mg capsule, 60	L01XE01
		imatinib	5443L	Glivec	imatinib 100 mg tablet, 60	L01XE01
		imatinib	9111M	Glivec	imatinib 100 mg tablet, 60	L01XE01
		imatinib	9113P	Glivec	imatinib 100 mg tablet, 60	L01XE01
		imatinib	9115R	Glivec	imatinib 100 mg tablet, 60	L01XE01
		imatinib	9123E	Glivec	imatinib 100 mg tablet, 60	L01XE01
		imatinib	9172R	Glivec	imatinib 100 mg tablet, 60	L01XE01
		imatinib	9174W	Glivec	imatinib 100 mg tablet, 60	L01XE01
		imatinib	9176Y	Glivec	imatinib 100 mg tablet, 60	L01XE01
		imatinib	9178C	Glivec	imatinib 100 mg tablet, 60	L01XE01
		imatinib	10916M	IMATINIB AN	imatinib 400 mg capsule, 30	L01XE01
		imatinib	10917N	IMATINIB AN	imatinib 400 mg capsule, 30	L01XE01
		imatinib	10921T	IMATINIB AN	imatinib 400 mg capsule, 30	L01XE01
		imatinib	10925B	IMATINIB AN	imatinib 400 mg capsule, 30	L01XE01
		imatinib	10933K	IMATINIB AN	imatinib 400 mg capsule, 30	L01XE01
		imatinib	10935M	IMATINIB AN	imatinib 400 mg capsule, 30	L01XE01
		imatinib	10939R	IMATINIB AN	imatinib 400 mg capsule, 30	L01XE01
		imatinib	5444M	Glivec	imatinib 400 mg tablet, 30	L01XE01
		imatinib	9112N	Glivec	imatinib 400 mg tablet, 30	L01XE01
		imatinib	9114Q	Glivec	imatinib 400 mg tablet, 30	L01XE01
		imatinib	9116T	Glivec	imatinib 400 mg tablet, 30	L01XE01
		imatinib	9124F	Glivec	imatinib 400 mg tablet, 30	L01XE01
		imatinib	9173T	Glivec	imatinib 400 mg tablet, 30	L01XE01
		imatinib	9175X	Glivec	imatinib 400 mg tablet, 30	L01XE01
		imatinib	9177B	Glivec	imatinib 400 mg tablet, 30	L01XE01
		imatinib	9179D	Glivec	imatinib 400 mg tablet, 30	L01XE01
		imatinib mesylate	6440Y	Glivec	Tablet 100 mg (base)	L01XE01
		imatinib mesylate	6444E	Glivec	Tablet 100 mg (base)	L01XE01
		imatinib mesylate	6446G	Glivec	Tablet 100 mg (base)	L01XE01
		imatinib mesylate	6441B	Glivec	Tablet 400 mg (base)	L01XE01
		imatinib mesylate	6445F	Glivec	Tablet 400 mg (base)	L01XE01
		imatinib mesylate	6447H	Glivec	Tablet 400 mg (base)	L01XE01
		ipilimumab	2638W	Yervoy	Yervoy (ipilimumab 200 mg/40 mL) injection: concentrated, vial	L01XC11
		ipilimumab	2641B	Yervoy	Yervoy (ipilimumab 200 mg/40 mL) injection: concentrated, vial	L01XC11
		ipilimumab	2643D	Yervoy	Yervoy (ipilimumab 200 mg/40 mL) injection: concentrated, vial	L01XC11
		ipilimumab	2663E	Yervoy	Yervoy (ipilimumab 200 mg/40 mL) injection: concentrated, vial	L01XC11
		irinotecan	4451G	Irinotecan Alphapharm	Irinotecan Hydrochloride Trihydrate (Alphapharm) (irinotecan hydrochloride trihydrate 100 mg/5 mL) injection: concentrated, vial	L01XX19
		irinotecan	7249M	Irinotecan Alphapharm	Irinotecan Hydrochloride Trihydrate (Alphapharm) (irinotecan hydrochloride trihydrate 100 mg/5 mL) injection: concentrated, vial	L01XX19
		irinotecan hydrochloride trihydrate	5959P	Hospira Pty Limited	I.V. injection 100 mg in 5 mL	L01XX19
		irinotecan hydrochloride trihydrate	8415X	Hospira Pty Limited	I.V. injection 100 mg in 5 mL	L01XX19
		irinotecan hydrochloride trihydrate	5846Q	Camptosar	I.V. injection 300 mg in 15 mL	L01XX19
		irinotecan hydrochloride trihydrate	9410G	Camptosar	I.V. injection 300 mg in 15 mL	L01XX19
		irinotecan hydrochloride trihydrate	5958N	Hospira Pty Limited	I.V. injection 40 mg in 2 mL	L01XX19
		irinotecan hydrochloride trihydrate	8414W	Hospira Pty Limited	I.V. injection 40 mg in 2 mL	L01XX19
		irinotecan hydrochloride trihydrate	5833B	Hospira Pty Limited	I.V. injection 500 mg in 25 mL	L01XX19
		irinotecan hydrochloride trihydrate	9119Y	Hospira Pty Limited	I.V. injection 500 mg in 25 mL	L01XX19
		lapatinib	9148L	Tykerb	lapatinib 250 mg tablet, 70	L01XE07
		lenvatinib	10965D	Lenvima	lenvatinib 10 mg capsule, 30	L01XE29
		lenvatinib	10952K	Lenvima	lenvatinib 4 mg capsule, 30	L01XE29
		melphalan	2547C	Alkeran	melphalan 2 mg tablet, 25	L01AA03
		mercaptopurine	10214N	Allmercap	mercaptopurine 20 mg/mL oral liquid, 100 mL	L01BB02
		mercaptopurine	1598D	Purinethol	mercaptopurine 50 mg tablet, 25	L01BB02
		methotrexate	5962T	Hospira Pty Limited	Injection 5 mg in 2 mL	L01BA01
		methotrexate	5963W	Hospira Pty Limited	Injection 50 mg in 2 mL	L01BA01
		methotrexate	1818Q	Methaccord	METHOTREXATE Injection 50 mg in 2 mL, 1	L01BA01
		methotrexate	4502Y	Methaccord	Methaccord (methotrexate 1 g/10 mL) injection: solution, vial	L01BA01
		methotrexate	4512L	Methaccord	Methaccord (methotrexate 1 g/10 mL) injection: solution, vial	L01BA01
		methotrexate	7250N	Methaccord	Methaccord (methotrexate 1 g/10 mL) injection: solution, vial	L01BA01
		methotrexate	7251P	Methaccord	Methaccord (methotrexate 1 g/10 mL) injection: solution, vial	L01BA01
		methotrexate	5875F	Hospira Pty Limited	Solution concentrate for I.V. infusion 1000 mg in 10 mL	L01BA01
		methotrexate	8851W	Hospira Pty Limited	Solution concentrate for I.V. infusion 1000 mg in 10 mL	L01BA01
		methotrexate	5873D	Hospira Pty Limited	Solution concentrate for I.V. infusion 500 mg in 20 mL	L01BA01
		methotrexate	8863L	Hospira Pty Limited	Solution concentrate for I.V. infusion 500 mg in 20 mL	L01BA01
		methotrexate	5874E	Methotrexate Ebewe	Solution concentrate for I.V. infusion 500 mg in 5 mL	L01BA01
		methotrexate	8850T	Methotrexate Ebewe	Solution concentrate for I.V. infusion 500 mg in 5 mL	L01BA01
		methotrexate	5876G	Methotrexate Ebewe	Solution concentrate for I.V. infusion 5000 mg in 50 mL	L01BA01
		methotrexate	8852X	Methotrexate Ebewe	Solution concentrate for I.V. infusion 5000 mg in 50 mL	L01BA01
		methotrexate	2272N	Methoblastin	methotrexate 10 mg tablet, 15	L01BA01
		methotrexate	1623K	Methoblastin	methotrexate 10 mg tablet, 50	L01BA01
		methotrexate	1622J	Methoblastin	methotrexate 2.5 mg tablet, 30	L01BA01
		methotrexate	2396D	Hospira Pty Limited	methotrexate 5 mg/2 mL injection, 5 x 2 mL vials	L01BA01
		methotrexate	2395C	Hospira Pty Limited	methotrexate 50 mg/2 mL injection, 5 x 2 mL vials	L01BA01
		mitozantrone	4514N	Onkotrone	Onkotrone (mitozantrone (as hydrochloride) 20 mg/10 mL) injection: concentrated, vial	L01DB07
		mitozantrone	7252Q	Onkotrone	Onkotrone (mitozantrone (as hydrochloride) 20 mg/10 mL) injection: concentrated, vial	L01DB07
		mitozantrone hydrochloride	1932Q	Pfizer Australia Pty Ltd	Injection 10 mg (base) in 5 mL	L01DB07
		mitozantrone hydrochloride	5964X	Pfizer Australia Pty Ltd	Injection 10 mg (base) in 5 mL	L01DB07
		mitozantrone hydrochloride	1929M	Hospira Pty Limited	Injection 20 mg (base) in 10 mL	L01DB07
		mitozantrone hydrochloride	5965Y	Hospira Pty Limited	Injection 20 mg (base) in 10 mL	L01DB07
		mitozantrone hydrochloride	1930N	Onkotrone	Injection 25 mg (base) in 12.5 mL	L01DB07
		mitozantrone hydrochloride	5966B	Onkotrone	Injection 25 mg (base) in 12.5 mL	L01DB07
		nab paclitaxel	5847R	Abraxane	Powder for I.V. injection 100 mg (base)	L01CD01
		nab paclitaxel	9415M	Abraxane	Powder for I.V. injection 100 mg (base)	L01CD01
		nanoparticle albumin-bound paclitaxel	10150F	Abraxane	Abraxane (paclitaxel nanoparticle albumin bound 100 mg) injection: powder for, vial	L01CD01
		nanoparticle albumin-bound paclitaxel	10165B	Abraxane	Abraxane (paclitaxel nanoparticle albumin bound 100 mg) injection: powder for, vial	L01CD01
		nanoparticle albumin-bound paclitaxel	4531L	Abraxane	Abraxane (paclitaxel nanoparticle albumin bound 100 mg) injection: powder for, vial	L01CD01
		nanoparticle albumin-bound paclitaxel	7270P	Abraxane	Abraxane (paclitaxel nanoparticle albumin bound 100 mg) injection: powder for, vial	L01CD01
		nilotinib	9285Q	Tasigna	Capsule 200 mg (as hydrochloride monohydrate)	L01XE08
		nilotinib	1309X	Tasigna	NILOTINIB Capsule 150 mg (as hydrochloride monohydrate), 120	L01XE08
		nilotinib	9171Q	Tasigna	NILOTINIB Capsule 200 mg (as hydrochloride monohydrate), 120	L01XE08
		nivolumab	10745M	Opdivo	Opdivo 100 mg/10 mL injection: concentrated, 10 mL vial	L01XC17
		nivolumab	10748Q	Opdivo	Opdivo 100 mg/10 mL injection: concentrated, 10 mL vial	L01XC17
		nivolumab	10764M	Opdivo	Opdivo 100 mg/10 mL injection: concentrated, 10 mL vial	L01XC17
		nivolumab	10775D	Opdivo	Opdivo 100 mg/10 mL injection: concentrated, 10 mL vial	L01XC17
		obinutuzumab	10407R	Gazyva	Gazyva 1 g/40 mL injection: concentrated, 40 mL vial	L01XC15
		obinutuzumab	10418H	Gazyva	Gazyva 1 g/40 mL injection: concentrated, 40 mL vial	L01XC15
		ofatumumab	10236R	Arzerra	Arzerra 1 g/50 mL injection: concentrated, 50 mL vial	L01XC10
		ofatumumab	10237T	Arzerra	Arzerra 1 g/50 mL injection: concentrated, 50 mL vial	L01XC10
		ofatumumab	10239X	Arzerra	Arzerra 1 g/50 mL injection: concentrated, 50 mL vial	L01XC10
		ofatumumab	10252N	Arzerra	Arzerra 1 g/50 mL injection: concentrated, 50 mL vial	L01XC10
		ofatumumab	10240Y	Arzerra	Arzerra 100 mg/5 mL injection: concentrated, 5 mL vial	L01XC10
		ofatumumab	10249K	Arzerra	Arzerra 100 mg/5 mL injection: concentrated, 5 mL vial	L01XC10
		oxaliplatin	4542C	Oxaliccord	Oxaliccord (oxaliplatin 100 mg/20 mL) injection: concentrated, vial	L01XA03
		oxaliplatin	7253R	Oxaliccord	Oxaliccord (oxaliplatin 100 mg/20 mL) injection: concentrated, vial	L01XA03
		oxaliplatin	5995M	Hospira Pty Limited	Powder for I.V. infusion 100 mg	L01XA03
		oxaliplatin	8540L	Hospira Pty Limited	Powder for I.V. infusion 100 mg	L01XA03
		oxaliplatin	5994L	Hospira Pty Limited	Powder for I.V. infusion 50 mg	L01XA03
		oxaliplatin	8539K	Hospira Pty Limited	Powder for I.V. infusion 50 mg	L01XA03
		oxaliplatin	5878J	Eloxatin	Solution concentrate for I.V. infusion 100 mg in 20 mL	L01XA03
		oxaliplatin	8848Q	Eloxatin	Solution concentrate for I.V. infusion 100 mg in 20 mL	L01XA03
		oxaliplatin	2310N	Eloxatin	Solution concentrate for I.V. infusion 200 mg in 40 mL	L01XA03
		oxaliplatin	5999R	Eloxatin	Solution concentrate for I.V. infusion 200 mg in 40 mL	L01XA03
		oxaliplatin	5877H	Eloxatin	Solution concentrate for I.V. infusion 50 mg in 10 mL	L01XA03
		oxaliplatin	8847P	Eloxatin	Solution concentrate for I.V. infusion 50 mg in 10 mL	L01XA03
		paclitaxel	4567J	Paclitaxel ACT	Paclitaxel (Act) (paclitaxel 100 mg/16.7 mL) injection: concentrated, vial	L01CD01
		paclitaxel	7254T	Paclitaxel ACT	Paclitaxel (Act) (paclitaxel 100 mg/16.7 mL) injection: concentrated, vial	L01CD01
		paclitaxel	5974K	Taxol	Solution concentrate for I.V. infusion 100 mg in 16.7 mL	L01CD01
		paclitaxel	8018B	Taxol	Solution concentrate for I.V. infusion 100 mg in 16.7 mL	L01CD01
		paclitaxel	3017T	Anzatax	Solution concentrate for I.V. infusion 150 mg in 25 mL	L01CD01
		paclitaxel	5975L	Anzatax	Solution concentrate for I.V. infusion 150 mg in 25 mL	L01CD01
		paclitaxel	3026G	Taxol	Solution concentrate for I.V. infusion 30 mg in 5 mL	L01CD01
		paclitaxel	5973J	Taxol	Solution concentrate for I.V. infusion 30 mg in 5 mL	L01CD01
		paclitaxel	5976M	Taxol	Solution concentrate for I.V. infusion 300 mg in 50 mL	L01CD01
		paclitaxel	8360B	Taxol	Solution concentrate for I.V. infusion 300 mg in 50 mL	L01CD01
		panitumumab	10069Y	Vectibix	Vectibix (panitumumab 100 mg/5 mL) injection: concentrated, vial	L01XC08
		panitumumab	10082P	Vectibix	Vectibix (panitumumab 100 mg/5 mL) injection: concentrated, vial	L01XC08
		panitumumab	10508C	Vectibix	Vectibix (panitumumab 100 mg/5 mL) injection: concentrated, vial	L01XC08
		panitumumab	10513H	Vectibix	Vectibix (panitumumab 100 mg/5 mL) injection: concentrated, vial	L01XC08
		pazopanib	10054E	Votrient	pazopanib 200 mg tablet, 30	L01XE11
		pazopanib	2232L	Votrient	pazopanib 200 mg tablet, 30	L01XE11
		pazopanib	10042M	Votrient	pazopanib 200 mg tablet, 90	L01XE11
		pazopanib	10047T	Votrient	pazopanib 200 mg tablet, 90	L01XE11
		pazopanib	2029T	Votrient	pazopanib 200 mg tablet, 90	L01XE11
		pazopanib	2034C	Votrient	pazopanib 200 mg tablet, 90	L01XE11
		pazopanib	10052C	Votrient	pazopanib 400 mg tablet, 30	L01XE11
		pazopanib	2201W	Votrient	pazopanib 400 mg tablet, 30	L01XE11
		pazopanib	10041L	Votrient	pazopanib 400 mg tablet, 60	L01XE11
		pazopanib	10043N	Votrient	pazopanib 400 mg tablet, 60	L01XE11
		pazopanib	2030W	Votrient	pazopanib 400 mg tablet, 60	L01XE11
		pazopanib	2035D	Votrient	pazopanib 400 mg tablet, 60	L01XE11
		pembrolizumab	10424P	Keytruda	Keytruda 100 mg/4 mL concentrated injection, 4 mL vial	L01XC18
		pembrolizumab	10436G	Keytruda	Keytruda 100 mg/4 mL concentrated injection, 4 mL vial	L01XC18
		pembrolizumab	10475H	Keytruda	Keytruda 100 mg/4 mL concentrated injection, 4 mL vial	L01XC18
		pembrolizumab	10493G	Keytruda	Keytruda 100 mg/4 mL concentrated injection, 4 mL vial	L01XC18
		pemetrexed	4600D	Reladdin	Reladdin 100 mg injection: powder for, 100 mg vial	L01BA04
		pemetrexed	7255W	Reladdin	Reladdin 100 mg injection: powder for, 100 mg vial	L01BA04
		pemetrexed disodium	5835D	Alimta	Powder for I.V. infusion 100 mg (base)	L01BA04
		pemetrexed disodium	9131N	Alimta	Powder for I.V. infusion 100 mg (base)	L01BA04
		pemetrexed disodium	5801H	Alimta	Powder for I.V. infusion 500 mg (base)	L01BA04
		pemetrexed disodium	5834C	Alimta	Powder for I.V. infusion 500 mg (base)	L01BA04
		pemetrexed disodium	5887W	Alimta	Powder for I.V. infusion 500 mg (base)	L01BA04
		pemetrexed disodium	8809P	Alimta	Powder for I.V. infusion 500 mg (base)	L01BA04
		pemetrexed disodium	9130M	Alimta	Powder for I.V. infusion 500 mg (base)	L01BA04
		pemetrexed disodium	9713F	Alimta	Powder for I.V. infusion 500 mg (base)	L01BA04
		pertuzumab	10267J	Perjeta	Perjeta (pertuzumab 420 mg/14 mL) injection: solution, vial	L01XC13
		pertuzumab	10268K	Perjeta	Perjeta (pertuzumab 420 mg/14 mL) injection: solution, vial	L01XC13
		pertuzumab	10308M	Perjeta	Perjeta (pertuzumab 420 mg/14 mL) injection: solution, vial	L01XC13
		pertuzumab	10309N	Perjeta	Perjeta (pertuzumab 420 mg/14 mL) injection: solution, vial	L01XC13
		pertuzumab	10333W	Perjeta	Perjeta (pertuzumab 420 mg/14 mL) injection: solution, vial	L01XC13
		pertuzumab	10334X	Perjeta	Perjeta (pertuzumab 420 mg/14 mL) injection: solution, vial	L01XC13
		ponatinib	10520Q	Iclusig	ponatinib 15 mg tablet, 60	L01XE24
		ponatinib	10523W	Iclusig	ponatinib 15 mg tablet, 60	L01XE24
		ponatinib	10524X	Iclusig	ponatinib 45 mg tablet, 30	L01XE24
		ponatinib	10530F	Iclusig	ponatinib 45 mg tablet, 30	L01XE24
		raltitrexed	5977N	Tomudex	Powder for I.V. infusion 2 mg	L01BA03
		raltitrexed	8284B	Tomudex	Powder for I.V. infusion 2 mg	L01BA03
		raltitrexed	4610P	Tomudex	Tomudex (raltitrexed 2 mg) injection: powder for, vial	L01BA03
		raltitrexed	7256X	Tomudex	Tomudex (raltitrexed 2 mg) injection: powder for, vial	L01BA03
		rituximab	10179R	Mabthera	MabThera (rituximab 100 mg/10 mL) injection: concentrated, vial	L01XC02
		rituximab	10193L	Mabthera	MabThera (rituximab 100 mg/10 mL) injection: concentrated, vial	L01XC02
		rituximab	4613T	Mabthera	MabThera (rituximab 100 mg/10 mL) injection: concentrated, vial	L01XC02
		rituximab	4614W	Mabthera	MabThera (rituximab 100 mg/10 mL) injection: concentrated, vial	L01XC02
		rituximab	4615X	Mabthera	MabThera (rituximab 100 mg/10 mL) injection: concentrated, vial	L01XC02
		rituximab	7257Y	Mabthera	MabThera (rituximab 100 mg/10 mL) injection: concentrated, vial	L01XC02
		rituximab	7258B	Mabthera	MabThera (rituximab 100 mg/10 mL) injection: concentrated, vial	L01XC02
		rituximab	7259C	Mabthera	MabThera (rituximab 100 mg/10 mL) injection: concentrated, vial	L01XC02
		rituximab	5589E	Mabthera	Solution for I.V. infusion 100 mg in 10 mL	L01XC02
		rituximab	5896H	Mabthera	Solution for I.V. infusion 100 mg in 10 mL	L01XC02
		rituximab	5978P	Mabthera	Solution for I.V. infusion 100 mg in 10 mL	L01XC02
		rituximab	8293L	Mabthera	Solution for I.V. infusion 100 mg in 10 mL	L01XC02
		rituximab	8665C	Mabthera	Solution for I.V. infusion 100 mg in 10 mL	L01XC02
		rituximab	5590F	Mabthera	Solution for I.V. infusion 500 mg in 50 mL	L01XC02
		rituximab	5897J	Mabthera	Solution for I.V. infusion 500 mg in 50 mL	L01XC02
		rituximab	5979Q	Mabthera	Solution for I.V. infusion 500 mg in 50 mL	L01XC02
		rituximab	8294M	Mabthera	Solution for I.V. infusion 500 mg in 50 mL	L01XC02
		rituximab	8666D	Mabthera	Solution for I.V. infusion 500 mg in 50 mL	L01XC02
		rituximab	10703H	Mabthera SC	rituximab 1.4 g/11.7 mL injection, 11.7 mL vial	L01XC02
		rituximab	10708N	Mabthera SC	rituximab 1.4 g/11.7 mL injection, 11.7 mL vial	L01XC02
		rituximab	10709P	Mabthera SC	rituximab 1.4 g/11.7 mL injection, 11.7 mL vial	L01XC02
		rituximab	10710Q	Mabthera SC	rituximab 1.4 g/11.7 mL injection, 11.7 mL vial	L01XC02
		rituximab	10719E	Mabthera SC	rituximab 1.4 g/11.7 mL injection, 11.7 mL vial	L01XC02
		rituximab	10720F	Mabthera SC	rituximab 1.4 g/11.7 mL injection, 11.7 mL vial	L01XC02
		rituximab	10741H	Mabthera SC	rituximab 1.4 g/11.7 mL injection, 11.7 mL vial	L01XC02
		rituximab	10742J	Mabthera SC	rituximab 1.4 g/11.7 mL injection, 11.7 mL vial	L01XC02
		rituximab	10583B	Mabthera	rituximab 100 mg/10 mL injection, 2 x 10 mL vials	L01XC02
		rituximab	10591K	Mabthera	rituximab 100 mg/10 mL injection, 2 x 10 mL vials	L01XC02
		rituximab	10576P	Mabthera	rituximab 500 mg/50 mL injection, 50 mL vial	L01XC02
		rituximab	10593M	Mabthera	rituximab 500 mg/50 mL injection, 50 mL vial	L01XC02
		ruxolitinib	10913J	Jakavi	ruxolitinib 10 mg tablet, 56	L01XE18
		ruxolitinib	10927D	Jakavi	ruxolitinib 10 mg tablet, 56	L01XE18
		ruxolitinib	10615Q	Jakavi	ruxolitinib 15 mg tablet, 56	L01XE18
		ruxolitinib	10619X	Jakavi	ruxolitinib 15 mg tablet, 56	L01XE18
		ruxolitinib	10617T	Jakavi	ruxolitinib 20 mg tablet, 56	L01XE18
		ruxolitinib	10618W	Jakavi	ruxolitinib 20 mg tablet, 56	L01XE18
		ruxolitinib	10614P	Jakavi	ruxolitinib 5 mg tablet, 56	L01XE18
		ruxolitinib	10616R	Jakavi	ruxolitinib 5 mg tablet, 56	L01XE18
		sorafenib	10226F	Nexavar	sorafenib 200 mg tablet, 60	L01XE05
		sorafenib	10242C	Nexavar	sorafenib 200 mg tablet, 60	L01XE05
		sorafenib	9380Q	Nexavar	sorafenib 200 mg tablet, 60	L01XE05
		sunitinib	10004M	Sutent	sunitinib 12.5 mg capsule, 28	L01XE04
		sunitinib	10009T	Sutent	sunitinib 12.5 mg capsule, 28	L01XE04
		sunitinib	9417P	Sutent	sunitinib 12.5 mg capsule, 28	L01XE04
		sunitinib	9420T	Sutent	sunitinib 12.5 mg capsule, 28	L01XE04
		sunitinib	9488J	Sutent	sunitinib 12.5 mg capsule, 28	L01XE04
		sunitinib	2842N	Sutent	sunitinib 25 mg capsule, 28	L01XE04
		sunitinib	2959R	Sutent	sunitinib 25 mg capsule, 28	L01XE04
		sunitinib	9418Q	Sutent	sunitinib 25 mg capsule, 28	L01XE04
		sunitinib	9421W	Sutent	sunitinib 25 mg capsule, 28	L01XE04
		sunitinib	9489K	Sutent	sunitinib 25 mg capsule, 28	L01XE04
		sunitinib	10459L	Sutent	sunitinib 37.5 mg capsule, 28	L01XE04
		sunitinib	10464R	Sutent	sunitinib 37.5 mg capsule, 28	L01XE04
		sunitinib	10473F	Sutent	sunitinib 37.5 mg capsule, 28	L01XE04
		sunitinib	10503T	Sutent	sunitinib 37.5 mg capsule, 28	L01XE04
		sunitinib	10504W	Sutent	sunitinib 37.5 mg capsule, 28	L01XE04
		sunitinib	10010W	Sutent	sunitinib 50 mg capsule, 28	L01XE04
		sunitinib	2837H	Sutent	sunitinib 50 mg capsule, 28	L01XE04
		sunitinib	9419R	Sutent	sunitinib 50 mg capsule, 28	L01XE04
		sunitinib	9422X	Sutent	sunitinib 50 mg capsule, 28	L01XE04
		sunitinib	9490L	Sutent	sunitinib 50 mg capsule, 28	L01XE04
		temozolomide	5883P	Temodal	Capsule 100 mg	L01AX03
		temozolomide	5982W	Temodal	Capsule 100 mg	L01AX03
		temozolomide	5882N	Temodal	Capsule 20 mg	L01AX03
		temozolomide	5981T	Temodal	Capsule 20 mg	L01AX03
		temozolomide	5983X	Temodal	Capsule 250 mg	L01AX03
		temozolomide	5881M	Temodal	Capsule 5 mg	L01AX03
		temozolomide	5980R	Temodal	Capsule 5 mg	L01AX03
		temozolomide	8380C	Temozolomide Alphapharm	temozolomide 100 mg capsule, 5	L01AX03
		temozolomide	8821G	Temozolomide Alphapharm	temozolomide 100 mg capsule, 5	L01AX03
		temozolomide	9361Q	Temozolomide Alphapharm	temozolomide 140 mg capsule, 5	L01AX03
		temozolomide	9362R	Temozolomide Alphapharm	temozolomide 140 mg capsule, 5	L01AX03
		temozolomide	10062N	Temozolomide Amneal	temozolomide 180 mg capsule, 5	L01AX03
		temozolomide	2438H	Temozolomide Amneal	temozolomide 180 mg capsule, 5	L01AX03
		temozolomide	8379B	Temozolomide Alphapharm	temozolomide 20 mg capsule, 5	L01AX03
		temozolomide	8820F	Temozolomide Alphapharm	temozolomide 20 mg capsule, 5	L01AX03
		temozolomide	8381D	Temozolomide Alphapharm	temozolomide 250 mg capsule, 5	L01AX03
		temozolomide	8378Y	Temozolomide Alphapharm	temozolomide 5 mg capsule, 5	L01AX03
		temozolomide	8819E	Temozolomide Alphapharm	temozolomide 5 mg capsule, 5	L01AX03
		thioguanine	1233X	Lanvis	thioguanine 40 mg tablet, 25	L01BB03
		thiotepa	2345K	Aspen Pharma Pty Ltd	Powder for injection 15 mg	L01AC01
		thiotepa	5984Y	Aspen Pharma Pty Ltd	Powder for injection 15 mg	L01AC01
		topotecan	4617B	Hycamtin	Hycamtin (topotecan (as hydrochloride) 4 mg) injection: powder for, vial	L01XX17
		topotecan	7260D	Hycamtin	Hycamtin (topotecan (as hydrochloride) 4 mg) injection: powder for, vial	L01XX17
		topotecan hydrochloride	5985B	Hycamtin	Powder for I.V. infusion 4 mg (base)	L01XX17
		topotecan hydrochloride	8199M	Hycamtin	Powder for I.V. infusion 4 mg (base)	L01XX17
		trametinib	10382K	Mekinist	trametinib 2 mg tablet, 30	L01XE25
		trametinib	10405P	Mekinist	trametinib 2 mg tablet, 30	L01XE25
		trametinib	10385N	Mekinist	trametinib 500 microgram tablet, 30	L01XE25
		trametinib	10403M	Mekinist	trametinib 500 microgram tablet, 30	L01XE25
		trastuzumab	10269L	Herceptin	Herceptin (trastuzumab 150 mg) injection: powder for, vial	L01XC03
		trastuzumab	10270M	Herceptin	Herceptin (trastuzumab 150 mg) injection: powder for, vial	L01XC03
		trastuzumab	10296X	Herceptin	Herceptin (trastuzumab 150 mg) injection: powder for, vial	L01XC03
		trastuzumab	10324J	Herceptin	Herceptin (trastuzumab 150 mg) injection: powder for, vial	L01XC03
		trastuzumab	10346M	Herceptin	Herceptin (trastuzumab 150 mg) injection: powder for, vial	L01XC03
		trastuzumab	10362J	Herceptin	Herceptin (trastuzumab 150 mg) injection: powder for, vial	L01XC03
		trastuzumab	10381J	Herceptin	Herceptin (trastuzumab 150 mg) injection: powder for, vial	L01XC03
		trastuzumab	10383L	Herceptin	Herceptin (trastuzumab 150 mg) injection: powder for, vial	L01XC03
		trastuzumab	10391X	Herceptin	Herceptin (trastuzumab 150 mg) injection: powder for, vial	L01XC03
		trastuzumab	10401K	Herceptin	Herceptin (trastuzumab 150 mg) injection: powder for, vial	L01XC03
		trastuzumab	10402L	Herceptin	Herceptin (trastuzumab 150 mg) injection: powder for, vial	L01XC03
		trastuzumab	10423N	Herceptin	Herceptin (trastuzumab 150 mg) injection: powder for, vial	L01XC03
		trastuzumab	10575N	Herceptin	Herceptin (trastuzumab 150 mg) injection: powder for, vial	L01XC03
		trastuzumab	10581X	Herceptin	Herceptin (trastuzumab 150 mg) injection: powder for, vial	L01XC03
		trastuzumab	10588G	Herceptin	Herceptin (trastuzumab 150 mg) injection: powder for, vial	L01XC03
		trastuzumab	10589H	Herceptin	Herceptin (trastuzumab 150 mg) injection: powder for, vial	L01XC03
		trastuzumab	10595P	Herceptin	Herceptin (trastuzumab 150 mg) injection: powder for, vial	L01XC03
		trastuzumab	10597R	Herceptin	Herceptin (trastuzumab 150 mg) injection: powder for, vial	L01XC03
		trastuzumab	4632T	Herceptin	Herceptin (trastuzumab 150 mg) injection: powder for, vial	L01XC03
		trastuzumab	4639E	Herceptin	Herceptin (trastuzumab 150 mg) injection: powder for, vial	L01XC03
		trastuzumab	4650R	Herceptin	Herceptin (trastuzumab 150 mg) injection: powder for, vial	L01XC03
		trastuzumab	4703M	Herceptin	Herceptin (trastuzumab 150 mg) injection: powder for, vial	L01XC03
		trastuzumab	7264H	Herceptin	Herceptin (trastuzumab 150 mg) injection: powder for, vial	L01XC03
		trastuzumab	7265J	Herceptin	Herceptin (trastuzumab 150 mg) injection: powder for, vial	L01XC03
		trastuzumab	7266K	Herceptin	Herceptin (trastuzumab 150 mg) injection: powder for, vial	L01XC03
		trastuzumab	7267L	Herceptin	Herceptin (trastuzumab 150 mg) injection: powder for, vial	L01XC03
		trastuzumab	6497Y	Herceptin	Powder for I.V. infusion 150 mg	L01XC03
		trastuzumab	9689Y	Herceptin	Powder for I.V. infusion 150 mg	L01XC03
		trastuzumab	9690B	Herceptin	Powder for I.V. infusion 60 mg	L01XC03
		trastuzumab	9691C	Herceptin	Powder for I.V. infusion 60 mg	L01XC03
		trastuzumab	10682F	Herceptin SC	trastuzumab 600 mg/5 mL injection, 5 mL vial	L01XC03
		trastuzumab	10721G	Herceptin SC	trastuzumab 600 mg/5 mL injection, 5 mL vial	L01XC03
		trastuzumab	10743K	Herceptin SC	trastuzumab 600 mg/5 mL injection, 5 mL vial	L01XC03
		trastuzumab	10744L	Herceptin SC	trastuzumab 600 mg/5 mL injection, 5 mL vial	L01XC03
		trastuzumab	10798H	Herceptin SC	trastuzumab 600 mg/5 mL injection, 5 mL vial	L01XC03
		trastuzumab	10803N	Herceptin SC	trastuzumab 600 mg/5 mL injection, 5 mL vial	L01XC03
		trastuzumab	10811B	Herceptin SC	trastuzumab 600 mg/5 mL injection, 5 mL vial	L01XC03
		trastuzumab	10817H	Herceptin SC	trastuzumab 600 mg/5 mL injection, 5 mL vial	L01XC03
		trastuzumab	10825R	Herceptin SC	trastuzumab 600 mg/5 mL injection, 5 mL vial	L01XC03
		trastuzumab	10829Y	Herceptin SC	trastuzumab 600 mg/5 mL injection, 5 mL vial	L01XC03
		trastuzumab emtansine	10281D	Kadcyla	Kadcyla (trastuzumab emtansine 100 mg) injection: powder for, vial	L01XC14
		trastuzumab emtansine	10282E	Kadcyla	Kadcyla (trastuzumab emtansine 100 mg) injection: powder for, vial	L01XC14
		vinblastine	4618C	Vinblastine Teva	Vinblastine (Teva) 10 mg/10 mL injection solution, 10 mL vial	L01CA01
		vinblastine	7261E	Vinblastine Teva	Vinblastine (Teva) 10 mg/10 mL injection solution, 10 mL vial	L01CA01
		vinblastine sulfate	2199R	Hospira Pty Limited	Solution for I.V. injection 10 mg in 10 mL	L01CA01
		vinblastine sulfate	5989F	Hospira Pty Limited	Solution for I.V. injection 10 mg in 10 mL	L01CA01
		vincristine	4619D	Hospira Pty Limited	Vincristine Sulfate (DBL) (vincristine sulfate 1 mg/mL) injection: solution, vial	L01CA02
		vincristine	7262F	Hospira Pty Limited	Vincristine Sulfate (DBL) (vincristine sulfate 1 mg/mL) injection: solution, vial	L01CA02
		vincristine sulfate	2374Y	Hospira Pty Limited	I.V. injection 1 mg in 1 mL	L01CA02
		vincristine sulfate	5991H	Hospira Pty Limited	I.V. injection 1 mg in 1 mL	L01CA02
		vinorelbine	4620E	Navelbine	Navelbine (vinorelbine (as tartrate) 10 mg/mL) injection: concentrated, vial	L01CA04
		vinorelbine	7263G	Navelbine	Navelbine (vinorelbine (as tartrate) 10 mg/mL) injection: concentrated, vial	L01CA04
		vinorelbine	5992J	Hospira Pty Limited	Solution for I.V. infusion 10 mg (as tartrate) in 1 mL	L01CA04
		vinorelbine	8280T	Hospira Pty Limited	Solution for I.V. infusion 10 mg (as tartrate) in 1 mL	L01CA04
		vinorelbine	5993K	Hospira Pty Limited	Solution for I.V. infusion 50 mg (as tartrate) in 5 mL	L01CA04
		vinorelbine	8281W	Hospira Pty Limited	Solution for I.V. infusion 50 mg (as tartrate) in 5 mL	L01CA04
		vinorelbine	9009E	Navelbine	vinorelbine 20 mg capsule, 1	L01CA04
		vinorelbine	9010F	Navelbine	vinorelbine 30 mg capsule, 1	L01CA04

## Sheet: Hypertension
	Hypertension
	About:
	All Antihypertensives. Ace Inhibitors, Angiotensin II antagonists, beta-blockers, calcium channel blockers and diuretics.
	Drug Group	Drug	Drug Code	Brands	Form and Strength	ATC Code
	Hypertension	amiloride + hydrochlorothiazide	1486F	Moduretic	amiloride hydrochloride 5 mg + hydrochlorothiazide 50 mg tablet, 50	C03EA01
		amiloride hydrochloride	3109P	Kaluril	Tablet 5 mg	C03DB01
		amlodipine	1345T	Amlo 10	amlodipine 10 mg tablet, 30	C08CA01
		amlodipine	2752W	Nordip	amlodipine 10 mg tablet, 30	C08CA01
		amlodipine	1343Q	Amlo 5	amlodipine 5 mg tablet, 30	C08CA01
		amlodipine	2751T	Nordip	amlodipine 5 mg tablet, 30	C08CA01
		amlodipine + atorvastatin	9053L	Cadivast 10/10	amlodipine 10 mg + atorvastatin 10 mg tablet, 30	C10BX03
		amlodipine + atorvastatin	9054M	Cadivast 10/20	amlodipine 10 mg + atorvastatin 20 mg tablet, 30	C10BX03
		amlodipine + atorvastatin	9055N	Cadivast 10/40	amlodipine 10 mg + atorvastatin 40 mg tablet, 30	C10BX03
		amlodipine + atorvastatin	9056P	Cadivast 10/80	amlodipine 10 mg + atorvastatin 80 mg tablet, 30	C10BX03
		amlodipine + atorvastatin	9049G	Cadivast 5/10	amlodipine 5 mg + atorvastatin 10 mg tablet, 30	C10BX03
		amlodipine + atorvastatin	9050H	Cadivast 5/20	amlodipine 5 mg + atorvastatin 20 mg tablet, 30	C10BX03
		amlodipine + atorvastatin	9051J	Cadivast 5/40	amlodipine 5 mg + atorvastatin 40 mg tablet, 30	C10BX03
		amlodipine + atorvastatin	9052K	Cadivast 5/80	amlodipine 5 mg + atorvastatin 80 mg tablet, 30	C10BX03
		amlodipine + valsartan	9377M	Exforge 10/160	amlodipine 10 mg + valsartan 160 mg tablet, 28	C09DB01
		amlodipine + valsartan	5460J	Exforge 10/320	amlodipine 10 mg + valsartan 320 mg tablet, 28	C09DB01
		amlodipine + valsartan	9376L	Exforge 5/160	amlodipine 5 mg + valsartan 160 mg tablet, 28	C09DB01
		amlodipine + valsartan	5459H	Exforge 5/320	amlodipine 5 mg + valsartan 320 mg tablet, 28	C09DB01
		amlodipine + valsartan	9375K	Valsartan/Amlodipine Sandoz 80/5	amlodipine 5 mg + valsartan 80 mg tablet, 28	C09DB01
		amlodipine + valsartan + hydrochlorothiazide	5287G	Exforge HCT 10/160/12.5	amlodipine 10 mg + valsartan 160 mg + hydrochlorothiazide 12.5 mg tablet, 28	C09DX01
		amlodipine + valsartan + hydrochlorothiazide	5288H	Exforge HCT 10/160/25	amlodipine 10 mg + valsartan 160 mg + hydrochlorothiazide 25 mg tablet, 28	C09DX01
		amlodipine + valsartan + hydrochlorothiazide	5289J	Exforge HCT 10/320/25	amlodipine 10 mg + valsartan 320 mg + hydrochlorothiazide 25 mg tablet, 28	C09DX01
		amlodipine + valsartan + hydrochlorothiazide	5285E	Valsartan/Amlodipine/HCT Sandoz 160/5/12.5	amlodipine 5 mg + valsartan 160 mg + hydrochlorothiazide 12.5 mg tablet, 28	C09DX01
		amlodipine + valsartan + hydrochlorothiazide	5286F	Exforge HCT 5/160/25	amlodipine 5 mg + valsartan 160 mg + hydrochlorothiazide 25 mg tablet, 28	C09DX01
		amlodipine besylate	8924Q	Norvasc	Tablet 10 mg (base)	C08CA01
		amlodipine besylate	8923P	Norvasc	Tablet 5 mg (base)	C08CA01
		candesartan	8297Q	Adesan	candesartan cilexetil 16 mg tablet, 30	C09CA06
		candesartan	8998N	Atacand	candesartan cilexetil 16 mg tablet, 30	C09CA06
		candesartan	8889W	Adesan	candesartan cilexetil 32 mg tablet, 30	C09CA06
		candesartan	8999P	Atacand	candesartan cilexetil 32 mg tablet, 30	C09CA06
		candesartan	8295N	Adesan	candesartan cilexetil 4 mg tablet, 30	C09CA06
		candesartan	8296P	Adesan	candesartan cilexetil 8 mg tablet, 30	C09CA06
		candesartan	8997M	Atacand	candesartan cilexetil 8 mg tablet, 30	C09CA06
		candesartan + hydrochlorothiazide	8504N	Adesan HCT 16/12.5	candesartan cilexetil 16 mg + hydrochlorothiazide 12.5 mg tablet, 30	C09DA06
		candesartan + hydrochlorothiazide	9314F	Adesan HCT 32/12.5	candesartan cilexetil 32 mg + hydrochlorothiazide 12.5 mg tablet, 30	C09DA06
		candesartan + hydrochlorothiazide	9315G	Adesan HCT 32/25	candesartan cilexetil 32 mg + hydrochlorothiazide 25 mg tablet, 30	C09DA06
		captopril	1147J	Zedace	captopril 12.5 mg tablet, 90	C09AA01
		captopril	1148K	Zedace	captopril 25 mg tablet, 90	C09AA01
		captopril	8760C	Capoten	captopril 5 mg/mL oral liquid, 95 mL	C09AA01
		captopril	1149L	Zedace	captopril 50 mg tablet, 90	C09AA01
		chlorthalidone	1585K	Hygroton 25	chlorthalidone 25 mg tablet, 50	C03BA04
		diltiazem	1312C	Vasocardol CD	diltiazem hydrochloride 180 mg modified release capsule, 30	C08DB01
		diltiazem	1313D	Vasocardol CD	diltiazem hydrochloride 240 mg modified release capsule, 30	C08DB01
		diltiazem	8480H	Vasocardol CD	diltiazem hydrochloride 360 mg modified release capsule, 30	C08DB01
		enalapril	1368B	Acetec	enalapril maleate 10 mg tablet, 30	C09AA02
		enalapril	1369C	Acetec	enalapril maleate 20 mg tablet, 30	C09AA02
		enalapril	1370D	Acetec	enalapril maleate 5 mg tablet, 30	C09AA02
		enalapril + hydrochlorothiazide	8477E	Renitec Plus 20/6	enalapril maleate 20 mg + hydrochlorothiazide 6 mg tablet, 30	C09BA02
		eprosartan	8397Y	Teveten	eprosartan 400 mg tablet, 28	C09CA02
		eprosartan	8951D	Teveten	eprosartan 400 mg tablet, 28	C09CA02
		eprosartan	5491B	Teveten	eprosartan 600 mg tablet, 28	C09CA02
		eprosartan	8447N	Teveten	eprosartan 600 mg tablet, 28	C09CA02
		eprosartan + hydrochlorothiazide	8624X	Teveten Plus 600/12.5	eprosartan 600 mg + hydrochlorothiazide 12.5 mg tablet, 28	C09DA02
		felodipine	2367N	Fendex ER	felodipine 10 mg modified release tablet, 30	C08CA02
		felodipine	2361G	Fendex ER	felodipine 2.5 mg modified release tablet, 30	C08CA02
		felodipine	2366M	Fendex ER	felodipine 5 mg modified release tablet, 30	C08CA02
		fosinopril	1182F	Monace 10	fosinopril sodium 10 mg tablet, 30	C09AA09
		fosinopril	1183G	Monace 20	fosinopril sodium 20 mg tablet, 30	C09AA09
		fosinopril + hydrochlorothiazide	8400D	Monoplus 10/12.5	fosinopril sodium 10 mg + hydrochlorothiazide 12.5 mg tablet, 30	C09BA09
		fosinopril + hydrochlorothiazide	8401E	Fosinopril/HCT Actavis 20/12.5	fosinopril sodium 20 mg + hydrochlorothiazide 12.5 mg tablet, 30	C09BA09
		frusemide	2411X	Lasix	frusemide 10 mg/mL oral liquid, 30 mL	C03CA01
		frusemide	2414C	Chem mart Frusemide	frusemide 20 mg tablet, 100	C03CA01
		frusemide	1810G	Urex-M	frusemide 20 mg tablet, 50	C03CA01
		frusemide	2413B	Frusemide-Claris	frusemide 20 mg/2 mL injection, 5 x 2 mL ampoules	C03CA01
		frusemide	3466K	Frusemide-Claris	frusemide 20 mg/2 mL injection, 5 x 2 mL ampoules	C03CA01
		frusemide	2412Y	Uremide	frusemide 40 mg tablet, 100	C03CA01
		frusemide	2415D	Urex-Forte	frusemide 500 mg tablet, 50	C03CA01
		hydrochlorothiazide + triamterene	1280J	Hydrene 25/50	hydrochlorothiazide 25 mg + triamterene 50 mg tablet, 100	C03EA01
		indapamide	8532C	Odaplix SR	indapamide hemihydrate 1.5 mg modified release tablet, 90	C03BA11
		indapamide	2436F	Dapa-Tabs	indapamide hemihydrate 2.5 mg tablet, 90	C03BA11
		irbesartan	8247C	Abisart	irbesartan 150 mg tablet, 30	C09CA04
		irbesartan	8248D	Abisart	irbesartan 300 mg tablet, 30	C09CA04
		irbesartan	8246B	Abisart	irbesartan 75 mg tablet, 30	C09CA04
		irbesartan + hydrochlorothiazide	8404H	Abisart HCT 150/12.5	irbesartan 150 mg + hydrochlorothiazide 12.5 mg tablet, 30	C09DA04
		irbesartan + hydrochlorothiazide	8405J	Abisart HCT 300/12.5	irbesartan 300 mg + hydrochlorothiazide 12.5 mg tablet, 30	C09DA04
		irbesartan + hydrochlorothiazide	2136K	Abisart HCT 300/25	irbesartan 300 mg + hydrochlorothiazide 25 mg tablet, 30	C09DA04
		lercanidipine	8534E	Zircol	lercanidipine hydrochloride 10 mg tablet, 28	C08CA13
		lercanidipine	8679T	Zircol	lercanidipine hydrochloride 20 mg tablet, 28	C08CA13
		lercanidipine + enalapril	9144G	Zan-Extra 10/10	lercanidipine hydrochloride 10 mg + enalapril maleate 10 mg tablet, 28	C09BB02
		lercanidipine + enalapril	9145H	Zan-Extra 10/20	lercanidipine hydrochloride 10 mg + enalapril maleate 20 mg tablet, 28	C09BB02
		lercanidipine hydrochloride	8939L	Zanidip	Tablet 10 mg	C08CA13
		lercanidipine hydrochloride	8940M	Zanidip	Tablet 20 mg	C08CA13
		lisinopril	2457H	Zinopril 10	lisinopril 10 mg tablet, 30	C09AA03
		lisinopril	2458J	Zinopril 20	lisinopril 20 mg tablet, 30	C09AA03
		lisinopril	2456G	Zinopril 5	lisinopril 5 mg tablet, 30	C09AA03
		losartan	5452Y	Cozavan	losartan potassium 25 mg tablet, 30	C09CA01
		losartan	8203R	Cozavan	losartan potassium 50 mg tablet, 30	C09CA01
		nifedipine	8938K	Adalat Oros 20mg	Tablet 20 mg (controlled release)	C08CA05
		nifedipine	1694E	Adefin 10	nifedipine 10 mg tablet, 60	C08CA05
		nifedipine	8610E	Adalat Oros 20mg	nifedipine 20 mg modified release tablet, 30	C08CA05
		nifedipine	1695F	Adefin 20	nifedipine 20 mg tablet, 60	C08CA05
		nifedipine	1906H	Adefin XL 30	nifedipine 30 mg modified release tablet, 30	C08CA05
		nifedipine	1907J	Adefin XL 60	nifedipine 60 mg modified release tablet, 30	C08CA05
		olmesartan + amlodipine + hydrochlorothiazide	10005N	Sevikar HCT 20/5/12.5	olmesartan medoxomil 20 mg + amlodipine 5 mg + hydrochlorothiazide 12.5 mg tablet, 30	C09DX03
		olmesartan + amlodipine + hydrochlorothiazide	2836G	Sevikar HCT 40/10/12.5	olmesartan medoxomil 40 mg + amlodipine 10 mg + hydrochlorothiazide 12.5 mg tablet, 30	C09DX03
		olmesartan + amlodipine + hydrochlorothiazide	2953K	Sevikar HCT 40/10/25	olmesartan medoxomil 40 mg + amlodipine 10 mg + hydrochlorothiazide 25 mg tablet, 30	C09DX03
		olmesartan + amlodipine + hydrochlorothiazide	2880N	Sevikar HCT 40/5/12.5	olmesartan medoxomil 40 mg + amlodipine 5 mg + hydrochlorothiazide 12.5 mg tablet, 30	C09DX03
		olmesartan + amlodipine + hydrochlorothiazide	2864R	Sevikar HCT 40/5/25	olmesartan medoxomil 40 mg + amlodipine 5 mg + hydrochlorothiazide 25 mg tablet, 30	C09DX03
		olmesartan medoxomil	2147B	Olmesartan - MYL	olmesartan medoxomil 20 mg tablet, 30	C09CA08
		olmesartan medoxomil	5492C	Olmetec	olmesartan medoxomil 20 mg tablet, 30	C09CA08
		olmesartan medoxomil	2148C	Olmesartan - MYL	olmesartan medoxomil 40 mg tablet, 30	C09CA08
		olmesartan medoxomil	5493D	Olmetec	olmesartan medoxomil 40 mg tablet, 30	C09CA08
		olmesartan medoxomil + amlodipine	5292M	Olmesartan/Amlodipine - MYL 20/5	olmesartan medoxomil 20 mg + amlodipine 5 mg tablet, 30	C09DB02
		olmesartan medoxomil + amlodipine	5294P	Olmesartan/Amlodipine - MYL 40/10	olmesartan medoxomil 40 mg + amlodipine 10 mg tablet, 30	C09DB02
		olmesartan medoxomil + amlodipine	5293N	Olmesartan/Amlodipine - MYL 40/5	olmesartan medoxomil 40 mg + amlodipine 5 mg tablet, 30	C09DB02
		olmesartan medoxomil + hydrochlorothiazide	2161R	Olmesartan HCT - MYL 20/12.5	olmesartan medoxomil 20 mg + hydrochlorothiazide 12.5 mg tablet, 30	C09DA08
		olmesartan medoxomil + hydrochlorothiazide	2166B	Olmesartan HCT - MYL 40/12.5	olmesartan medoxomil 40 mg + hydrochlorothiazide 12.5 mg tablet, 30	C09DA08
		olmesartan medoxomil + hydrochlorothiazide	2170F	Olmesartan HCT - MYL 40/25	olmesartan medoxomil 40 mg + hydrochlorothiazide 25 mg tablet, 30	C09DA08
		perindopril	9008D	PREXUM 10	perindopril arginine 10 mg tablet, 30	C09AA04
		perindopril	9006B	PREXUM 2.5	perindopril arginine 2.5 mg tablet, 30	C09AA04
		perindopril	9007C	PREXUM 5	perindopril arginine 5 mg tablet, 30	C09AA04
		perindopril	3050M	Perindo	perindopril erbumine 2 mg tablet, 30	C09AA04
		perindopril	3051N	Perindo	perindopril erbumine 4 mg tablet, 30	C09AA04
		perindopril	8704D	Perindo	perindopril erbumine 8 mg tablet, 30	C09AA04
		perindopril + amlodipine	9349C	Reaptan 10/10	perindopril arginine 10 mg + amlodipine 10 mg tablet, 30	C09BB04
		perindopril + amlodipine	9348B	Reaptan 10/5	perindopril arginine 10 mg + amlodipine 5 mg tablet, 30	C09BB04
		perindopril + amlodipine	9347Y	Reaptan 5/10	perindopril arginine 5 mg + amlodipine 10 mg tablet, 30	C09BB04
		perindopril + amlodipine	9346X	Reaptan 5/5	perindopril arginine 5 mg + amlodipine 5 mg tablet, 30	C09BB04
		perindopril + indapamide	2190G	PREXUM Combi LD 2.5/0.625	perindopril arginine 2.5 mg + indapamide hemihydrate 625 microgram tablet, 30	C09BA04
		perindopril + indapamide	2845R	Prexum Combi 5/1.25	perindopril arginine 5 mg + indapamide hemihydrate 1.25 mg tablet, 30	C09BA04
		perindopril + indapamide	8449Q	Perindo Combi 4/1.25	perindopril erbumine 4 mg + indapamide hemihydrate 1.25 mg tablet, 30	C09BA04
		quinapril	1969P	Qpril 10	quinapril 10 mg tablet, 30	C09AA06
		quinapril	1970Q	Qpril 20	quinapril 20 mg tablet, 30	C09AA06
		quinapril	1968N	Qpril 5	quinapril 5 mg tablet, 30	C09AA06
		quinapril + hydrochlorothiazide	8589C	Accuretic 10/12.5mg	quinapril 10 mg + hydrochlorothiazide 12.5 mg tablet, 30	C09BA06
		quinapril + hydrochlorothiazide	8590D	Accuretic 20/12.5mg	quinapril 20 mg + hydrochlorothiazide 12.5 mg tablet, 30	C09BA06
		ramipril	9120B	Tryzan Caps 1.25	ramipril 1.25 mg capsule, 30	C09AA05
		ramipril	1944H	Tryzan Tabs 1.25	ramipril 1.25 mg tablet, 30	C09AA05
		ramipril	8470T	Tryzan Caps 10	ramipril 10 mg capsule, 30	C09AA05
		ramipril	1316G	Tryzan Tabs 10	ramipril 10 mg tablet, 30	C09AA05
		ramipril	9121C	Tryzan Caps 2.5	ramipril 2.5 mg capsule, 30	C09AA05
		ramipril	8668F	Tritace Titration Pack	ramipril 2.5 mg tablet [7 tablets] (&) ramipril 5 mg tablet [21 tablets] (&) ramipril 10 mg capsule [10 capsules], 1 pack	C09AA05
		ramipril	1945J	Tryzan Tabs 2.5	ramipril 2.5 mg tablet, 30	C09AA05
		ramipril	9122D	Tryzan Caps 5	ramipril 5 mg capsule, 30	C09AA05
		ramipril	1946K	Tryzan Tabs 5	ramipril 5 mg tablet, 30	C09AA05
		ramipril + felodipine	2626F	Triasyn 2.5/2.5	ramipril 2.5 mg + felodipine 2.5 mg modified release tablet, 30	C09BB05
		ramipril + felodipine	2629J	Triasyn 5.0/5.0	ramipril 5 mg + felodipine 5 mg modified release tablet, 30	C09BB05
		spironolactone	2340E	Spiractin 100	spironolactone 100 mg tablet, 100	C03DA01
		spironolactone	2339D	Spiractin 25	spironolactone 25 mg tablet, 100	C03DA01
		telmisartan	5494E	Micardis	telmisartan 40 mg tablet, 28	C09CA07
		telmisartan	8355R	Mizart	telmisartan 40 mg tablet, 28	C09CA07
		telmisartan	5495F	Micardis	telmisartan 80 mg tablet, 28	C09CA07
		telmisartan	8356T	Mizart	telmisartan 80 mg tablet, 28	C09CA07
		telmisartan + amlodipine	8979N	Twynsta	telmisartan 40 mg + amlodipine 10 mg tablet, 28	C09DB04
		telmisartan + amlodipine	8978M	Twynsta	telmisartan 40 mg + amlodipine 5 mg tablet, 28	C09DB04
		telmisartan + amlodipine	8981Q	Twynsta	telmisartan 80 mg + amlodipine 10 mg tablet, 28	C09DB04
		telmisartan + amlodipine	8980P	Twynsta	telmisartan 80 mg + amlodipine 5 mg tablet, 28	C09DB04
		telmisartan + hydrochlorothiazide	8622T	Mizart HCT 40/12.5 mg	telmisartan 40 mg + hydrochlorothiazide 12.5 mg tablet, 28	C09DA07
		telmisartan + hydrochlorothiazide	8623W	Mizart HCT 80/12.5 mg	telmisartan 80 mg + hydrochlorothiazide 12.5 mg tablet, 28	C09DA07
		telmisartan + hydrochlorothiazide	9381R	Mizart HCT 80/25 mg	telmisartan 80 mg + hydrochlorothiazide 25 mg tablet, 28	C09DA07
		trandolapril	2792Y	Tranalpha	trandolapril 1 mg capsule, 28	C09AA10
		trandolapril	2793B	Tranalpha	trandolapril 2 mg capsule, 28	C09AA10
		trandolapril	8758Y	Tranalpha	trandolapril 4 mg capsule, 28	C09AA10
		trandolapril	2791X	Tranalpha	trandolapril 500 microgram capsule, 28	C09AA10
		trandolapril + verapamil	9387C	Tarka 2/180	trandolapril 2 mg + verapamil hydrochloride 180 mg modified release tablet, 28	C09BB10
		trandolapril + verapamil	2857J	Tarka 4/240	trandolapril 4 mg + verapamil hydrochloride 240 mg modified release tablet, 28	C09BB10
		valsartan	9370E	Dilart	valsartan 160 mg tablet, 28	C09CA03
		valsartan	9371F	Dilart	valsartan 320 mg tablet, 28	C09CA03
		valsartan	9368C	Dilart	valsartan 40 mg tablet, 28	C09CA03
		valsartan	9369D	Dilart	valsartan 80 mg tablet, 28	C09CA03
		valsartan + hydrochlorothiazide	9373H	Dilart HCT 160/12.5	valsartan 160 mg + hydrochlorothiazide 12.5 mg tablet, 28	C09DA03
		valsartan + hydrochlorothiazide	9374J	Dilart HCT 160/25	valsartan 160 mg + hydrochlorothiazide 25 mg tablet, 28	C09DA03
		valsartan + hydrochlorothiazide	9481B	Dilart HCT 320/12.5	valsartan 320 mg + hydrochlorothiazide 12.5 mg tablet, 28	C09DA03
		valsartan + hydrochlorothiazide	9482C	Dilart HCT 320/25	valsartan 320 mg + hydrochlorothiazide 25 mg tablet, 28	C09DA03
		valsartan + hydrochlorothiazide	9372G	Dilart HCT 80/12.5	valsartan 80 mg + hydrochlorothiazide 12.5 mg tablet, 28	C09DA03
		verapamil	1254B	Isoptin	verapamil hydrochloride 120 mg tablet, 100	C08DA01
		verapamil	2206D	Veracaps SR	verapamil hydrochloride 160 mg modified release capsule, 30	C08DA01
		verapamil	2208F	Isoptin 180 SR	verapamil hydrochloride 180 mg modified release tablet, 30	C08DA01
		verapamil	2207E	Veracaps SR	verapamil hydrochloride 240 mg modified release capsule, 30	C08DA01
		verapamil	1241H	Isoptin SR	verapamil hydrochloride 240 mg modified release tablet, 30	C08DA01
		verapamil	1248Q	Anpec 40	verapamil hydrochloride 40 mg tablet, 100	C08DA01
		verapamil	1250T	Anpec 80	verapamil hydrochloride 80 mg tablet, 100	C08DA01
		verapamil hydrochloride	1060T	Isoptin	Injection 5 mg in 2 mL	C08DA01
		verapamil hydrochloride	3494X	Isoptin	Injection 5 mg in 2 mL	C08DA01
		verapamil hydrochloride	1253Y	Isoptin	Tablet 160 mg	C08DA01
	ACE Inhibitors	captopril	1147J	Zedace	captopril 12.5 mg tablet, 90	C09AA01
		captopril	1148K	Zedace	captopril 25 mg tablet, 90	C09AA01
		captopril	8760C	Capoten	captopril 5 mg/mL oral liquid, 95 mL	C09AA01
		captopril	1149L	Zedace	captopril 50 mg tablet, 90	C09AA01
		enalapril	1368B	Acetec	enalapril maleate 10 mg tablet, 30	C09AA02
		enalapril	1369C	Acetec	enalapril maleate 20 mg tablet, 30	C09AA02
		enalapril	1370D	Acetec	enalapril maleate 5 mg tablet, 30	C09AA02
		fosinopril	1182F	Monace 10	fosinopril sodium 10 mg tablet, 30	C09AA09
		fosinopril	1183G	Monace 20	fosinopril sodium 20 mg tablet, 30	C09AA09
		fosinopril + hydrochlorothiazide	8400D	Monoplus 10/12.5	fosinopril sodium 10 mg + hydrochlorothiazide 12.5 mg tablet, 30	C09BA09
		fosinopril + hydrochlorothiazide	8401E	Fosinopril/HCT Actavis 20/12.5	fosinopril sodium 20 mg + hydrochlorothiazide 12.5 mg tablet, 30	C09BA09
		lercanidipine + enalapril	9144G	Zan-Extra 10/10	lercanidipine hydrochloride 10 mg + enalapril maleate 10 mg tablet, 28	C09BB02
		lercanidipine + enalapril	9145H	Zan-Extra 10/20	lercanidipine hydrochloride 10 mg + enalapril maleate 20 mg tablet, 28	C09BB02
		lisinopril	2457H	Zinopril 10	lisinopril 10 mg tablet, 30	C09AA03
		lisinopril	2458J	Zinopril 20	lisinopril 20 mg tablet, 30	C09AA03
		lisinopril	2456G	Zinopril 5	lisinopril 5 mg tablet, 30	C09AA03
		perindopril	9008D	PREXUM 10	perindopril arginine 10 mg tablet, 30	C09AA04
		perindopril	9006B	PREXUM 2.5	perindopril arginine 2.5 mg tablet, 30	C09AA04
		perindopril	9007C	PREXUM 5	perindopril arginine 5 mg tablet, 30	C09AA04
		perindopril	3050M	Perindo	perindopril erbumine 2 mg tablet, 30	C09AA04
		perindopril	3051N	Perindo	perindopril erbumine 4 mg tablet, 30	C09AA04
		perindopril	8704D	Perindo	perindopril erbumine 8 mg tablet, 30	C09AA04
		perindopril + amlodipine	9349C	Reaptan 10/10	perindopril arginine 10 mg + amlodipine 10 mg tablet, 30	C09BB04
		perindopril + amlodipine	9348B	Reaptan 10/5	perindopril arginine 10 mg + amlodipine 5 mg tablet, 30	C09BB04
		perindopril + amlodipine	9347Y	Reaptan 5/10	perindopril arginine 5 mg + amlodipine 10 mg tablet, 30	C09BB04
		perindopril + amlodipine	9346X	Reaptan 5/5	perindopril arginine 5 mg + amlodipine 5 mg tablet, 30	C09BB04
		perindopril + indapamide	2190G	PREXUM Combi LD 2.5/0.625	perindopril arginine 2.5 mg + indapamide hemihydrate 625 microgram tablet, 30	C09BA04
		perindopril + indapamide	2845R	Prexum Combi 5/1.25	perindopril arginine 5 mg + indapamide hemihydrate 1.25 mg tablet, 30	C09BA04
		perindopril + indapamide	8449Q	Perindo Combi 4/1.25	perindopril erbumine 4 mg + indapamide hemihydrate 1.25 mg tablet, 30	C09BA04
		quinapril	1969P	Qpril 10	quinapril 10 mg tablet, 30	C09AA06
		quinapril	1970Q	Qpril 20	quinapril 20 mg tablet, 30	C09AA06
		quinapril	1968N	Qpril 5	quinapril 5 mg tablet, 30	C09AA06
		ramipril	9120B	Tryzan Caps 1.25	ramipril 1.25 mg capsule, 30	C09AA05
		ramipril	1944H	Tryzan Tabs 1.25	ramipril 1.25 mg tablet, 30	C09AA05
		ramipril	8470T	Tryzan Caps 10	ramipril 10 mg capsule, 30	C09AA05
		ramipril	1316G	Tryzan Tabs 10	ramipril 10 mg tablet, 30	C09AA05
		ramipril	9121C	Tryzan Caps 2.5	ramipril 2.5 mg capsule, 30	C09AA05
		ramipril	8668F	Tritace Titration Pack	ramipril 2.5 mg tablet [7 tablets] (&) ramipril 5 mg tablet [21 tablets] (&) ramipril 10 mg capsule [10 capsules], 1 pack	C09AA05
		ramipril	1945J	Tryzan Tabs 2.5	ramipril 2.5 mg tablet, 30	C09AA05
		ramipril	9122D	Tryzan Caps 5	ramipril 5 mg capsule, 30	C09AA05
		ramipril	1946K	Tryzan Tabs 5	ramipril 5 mg tablet, 30	C09AA05
		trandolapril	2792Y	Tranalpha	trandolapril 1 mg capsule, 28	C09AA10
		trandolapril	2793B	Tranalpha	trandolapril 2 mg capsule, 28	C09AA10
		trandolapril	8758Y	Tranalpha	trandolapril 4 mg capsule, 28	C09AA10
		trandolapril	2791X	Tranalpha	trandolapril 500 microgram capsule, 28	C09AA10
		trandolapril + verapamil	9387C	Tarka 2/180	trandolapril 2 mg + verapamil hydrochloride 180 mg modified release tablet, 28	C09BB10
		trandolapril + verapamil	2857J	Tarka 4/240	trandolapril 4 mg + verapamil hydrochloride 240 mg modified release tablet, 28	C09BB10
	Angiotensin II Antagonist	amlodipine + valsartan	9377M	Exforge 10/160	amlodipine 10 mg + valsartan 160 mg tablet, 28	C09DB01
		amlodipine + valsartan	5460J	Exforge 10/320	amlodipine 10 mg + valsartan 320 mg tablet, 28	C09DB01
		amlodipine + valsartan	9376L	Exforge 5/160	amlodipine 5 mg + valsartan 160 mg tablet, 28	C09DB01
		amlodipine + valsartan	5459H	Exforge 5/320	amlodipine 5 mg + valsartan 320 mg tablet, 28	C09DB01
		amlodipine + valsartan	9375K	Valsartan/Amlodipine Sandoz 80/5	amlodipine 5 mg + valsartan 80 mg tablet, 28	C09DB01
		amlodipine + valsartan + hydrochlorothiazide	5287G	Exforge HCT 10/160/12.5	amlodipine 10 mg + valsartan 160 mg + hydrochlorothiazide 12.5 mg tablet, 28	C09DX01
		amlodipine + valsartan + hydrochlorothiazide	5288H	Exforge HCT 10/160/25	amlodipine 10 mg + valsartan 160 mg + hydrochlorothiazide 25 mg tablet, 28	C09DX01
		amlodipine + valsartan + hydrochlorothiazide	5289J	Exforge HCT 10/320/25	amlodipine 10 mg + valsartan 320 mg + hydrochlorothiazide 25 mg tablet, 28	C09DX01
		amlodipine + valsartan + hydrochlorothiazide	5285E	Valsartan/Amlodipine/HCT Sandoz 160/5/12.5	amlodipine 5 mg + valsartan 160 mg + hydrochlorothiazide 12.5 mg tablet, 28	C09DX01
		amlodipine + valsartan + hydrochlorothiazide	5286F	Exforge HCT 5/160/25	amlodipine 5 mg + valsartan 160 mg + hydrochlorothiazide 25 mg tablet, 28	C09DX01
		candesartan	8297Q	Adesan	candesartan cilexetil 16 mg tablet, 30	C09CA06
		candesartan	8998N	Atacand	candesartan cilexetil 16 mg tablet, 30	C09CA06
		candesartan	8889W	Adesan	candesartan cilexetil 32 mg tablet, 30	C09CA06
		candesartan	8999P	Atacand	candesartan cilexetil 32 mg tablet, 30	C09CA06
		candesartan	8295N	Adesan	candesartan cilexetil 4 mg tablet, 30	C09CA06
		candesartan	8296P	Adesan	candesartan cilexetil 8 mg tablet, 30	C09CA06
		candesartan	8997M	Atacand	candesartan cilexetil 8 mg tablet, 30	C09CA06
		candesartan + hydrochlorothiazide	8504N	Adesan HCT 16/12.5	candesartan cilexetil 16 mg + hydrochlorothiazide 12.5 mg tablet, 30	C09DA06
		candesartan + hydrochlorothiazide	9314F	Adesan HCT 32/12.5	candesartan cilexetil 32 mg + hydrochlorothiazide 12.5 mg tablet, 30	C09DA06
		candesartan + hydrochlorothiazide	9315G	Adesan HCT 32/25	candesartan cilexetil 32 mg + hydrochlorothiazide 25 mg tablet, 30	C09DA06
		eprosartan	8397Y	Teveten	eprosartan 400 mg tablet, 28	C09CA02
		eprosartan	8951D	Teveten	eprosartan 400 mg tablet, 28	C09CA02
		eprosartan	5491B	Teveten	eprosartan 600 mg tablet, 28	C09CA02
		eprosartan	8447N	Teveten	eprosartan 600 mg tablet, 28	C09CA02
		eprosartan + hydrochlorothiazide	8624X	Teveten Plus 600/12.5	eprosartan 600 mg + hydrochlorothiazide 12.5 mg tablet, 28	C09DA02
		irbesartan	8247C	Abisart	irbesartan 150 mg tablet, 30	C09CA04
		irbesartan	8248D	Abisart	irbesartan 300 mg tablet, 30	C09CA04
		irbesartan	8246B	Abisart	irbesartan 75 mg tablet, 30	C09CA04
		irbesartan + hydrochlorothiazide	8404H	Abisart HCT 150/12.5	irbesartan 150 mg + hydrochlorothiazide 12.5 mg tablet, 30	C09DA04
		irbesartan + hydrochlorothiazide	8405J	Abisart HCT 300/12.5	irbesartan 300 mg + hydrochlorothiazide 12.5 mg tablet, 30	C09DA04
		irbesartan + hydrochlorothiazide	2136K	Abisart HCT 300/25	irbesartan 300 mg + hydrochlorothiazide 25 mg tablet, 30	C09DA04
		losartan	5452Y	Cozavan	losartan potassium 25 mg tablet, 30	C09CA01
		losartan	8203R	Cozavan	losartan potassium 50 mg tablet, 30	C09CA01
		olmesartan + amlodipine + hydrochlorothiazide	10005N	Sevikar HCT 20/5/12.5	olmesartan medoxomil 20 mg + amlodipine 5 mg + hydrochlorothiazide 12.5 mg tablet, 30	C09DX03
		olmesartan + amlodipine + hydrochlorothiazide	2836G	Sevikar HCT 40/10/12.5	olmesartan medoxomil 40 mg + amlodipine 10 mg + hydrochlorothiazide 12.5 mg tablet, 30	C09DX03
		olmesartan + amlodipine + hydrochlorothiazide	2953K	Sevikar HCT 40/10/25	olmesartan medoxomil 40 mg + amlodipine 10 mg + hydrochlorothiazide 25 mg tablet, 30	C09DX03
		olmesartan + amlodipine + hydrochlorothiazide	2880N	Sevikar HCT 40/5/12.5	olmesartan medoxomil 40 mg + amlodipine 5 mg + hydrochlorothiazide 12.5 mg tablet, 30	C09DX03
		olmesartan + amlodipine + hydrochlorothiazide	2864R	Sevikar HCT 40/5/25	olmesartan medoxomil 40 mg + amlodipine 5 mg + hydrochlorothiazide 25 mg tablet, 30	C09DX03
		olmesartan medoxomil	2147B	Olmesartan - MYL	olmesartan medoxomil 20 mg tablet, 30	C09CA08
		olmesartan medoxomil	5492C	Olmetec	olmesartan medoxomil 20 mg tablet, 30	C09CA08
		olmesartan medoxomil	2148C	Olmesartan - MYL	olmesartan medoxomil 40 mg tablet, 30	C09CA08
		olmesartan medoxomil	5493D	Olmetec	olmesartan medoxomil 40 mg tablet, 30	C09CA08
		olmesartan medoxomil + amlodipine	5292M	Olmesartan/Amlodipine - MYL 20/5	olmesartan medoxomil 20 mg + amlodipine 5 mg tablet, 30	C09DB02
		olmesartan medoxomil + amlodipine	5294P	Olmesartan/Amlodipine - MYL 40/10	olmesartan medoxomil 40 mg + amlodipine 10 mg tablet, 30	C09DB02
		olmesartan medoxomil + amlodipine	5293N	Olmesartan/Amlodipine - MYL 40/5	olmesartan medoxomil 40 mg + amlodipine 5 mg tablet, 30	C09DB02
		olmesartan medoxomil + hydrochlorothiazide	2161R	Olmesartan HCT - MYL 20/12.5	olmesartan medoxomil 20 mg + hydrochlorothiazide 12.5 mg tablet, 30	C09DA08
		olmesartan medoxomil + hydrochlorothiazide	2166B	Olmesartan HCT - MYL 40/12.5	olmesartan medoxomil 40 mg + hydrochlorothiazide 12.5 mg tablet, 30	C09DA08
		olmesartan medoxomil + hydrochlorothiazide	2170F	Olmesartan HCT - MYL 40/25	olmesartan medoxomil 40 mg + hydrochlorothiazide 25 mg tablet, 30	C09DA08
		telmisartan	5494E	Micardis	telmisartan 40 mg tablet, 28	C09CA07
		telmisartan	8355R	Mizart	telmisartan 40 mg tablet, 28	C09CA07
		telmisartan	5495F	Micardis	telmisartan 80 mg tablet, 28	C09CA07
		telmisartan	8356T	Mizart	telmisartan 80 mg tablet, 28	C09CA07
		telmisartan + amlodipine	8979N	Twynsta	telmisartan 40 mg + amlodipine 10 mg tablet, 28	C09DB04
		telmisartan + amlodipine	8978M	Twynsta	telmisartan 40 mg + amlodipine 5 mg tablet, 28	C09DB04
		telmisartan + amlodipine	8981Q	Twynsta	telmisartan 80 mg + amlodipine 10 mg tablet, 28	C09DB04
		telmisartan + amlodipine	8980P	Twynsta	telmisartan 80 mg + amlodipine 5 mg tablet, 28	C09DB04
		telmisartan + hydrochlorothiazide	8622T	Mizart HCT 40/12.5 mg	telmisartan 40 mg + hydrochlorothiazide 12.5 mg tablet, 28	C09DA07
		telmisartan + hydrochlorothiazide	8623W	Mizart HCT 80/12.5 mg	telmisartan 80 mg + hydrochlorothiazide 12.5 mg tablet, 28	C09DA07
		telmisartan + hydrochlorothiazide	9381R	Mizart HCT 80/25 mg	telmisartan 80 mg + hydrochlorothiazide 25 mg tablet, 28	C09DA07
		valsartan	9370E	Dilart	valsartan 160 mg tablet, 28	C09CA03
		valsartan	9371F	Dilart	valsartan 320 mg tablet, 28	C09CA03
		valsartan	9368C	Dilart	valsartan 40 mg tablet, 28	C09CA03
		valsartan	9369D	Dilart	valsartan 80 mg tablet, 28	C09CA03
		valsartan + hydrochlorothiazide	9373H	Dilart HCT 160/12.5	valsartan 160 mg + hydrochlorothiazide 12.5 mg tablet, 28	C09DA03
		valsartan + hydrochlorothiazide	9374J	Dilart HCT 160/25	valsartan 160 mg + hydrochlorothiazide 25 mg tablet, 28	C09DA03
		valsartan + hydrochlorothiazide	9481B	Dilart HCT 320/12.5	valsartan 320 mg + hydrochlorothiazide 12.5 mg tablet, 28	C09DA03
		valsartan + hydrochlorothiazide	9482C	Dilart HCT 320/25	valsartan 320 mg + hydrochlorothiazide 25 mg tablet, 28	C09DA03
		valsartan + hydrochlorothiazide	9372G	Dilart HCT 80/12.5	valsartan 80 mg + hydrochlorothiazide 12.5 mg tablet, 28	C09DA03
	Beta Blocker	atenolol	1081X	Noten	atenolol 50 mg tablet, 30	C07AB03
		atenolol	2243C	Atenolol-AFT	atenolol 50 mg/10 mL oral liquid, 300 mL	C07AB03
		carvedilol	8257N	Dicarz	carvedilol 12.5 mg tablet, 60	C07AG02
		carvedilol	8258P	Dicarz	carvedilol 25 mg tablet, 60	C07AG02
		carvedilol	8255L	Chem mart Carvedilol 3.125 mg	carvedilol 3.125 mg tablet, 30	C07AG02
		carvedilol	8256M	Dicarz	carvedilol 6.25 mg tablet, 60	C07AG02
		labetalol	1566K	Presolol 100	labetalol hydrochloride 100 mg tablet, 100	C07AG01
		labetalol	1567L	Presolol 200	labetalol hydrochloride 200 mg tablet, 100	C07AG01
		metoprolol tartrate	1325R	Minax 100	METOPROLOL TARTRATE Tablet 100 mg, 60	C07AB02
		metoprolol tartrate	1324Q	Minax 50	METOPROLOL TARTRATE Tablet 50 mg, 100	C07AB02
		nebivolol	9310B	Nebilet	Tablet 1.25 mg (as hydrochloride), 28	C07AB12
		nebivolol	9316H	Nebilet	nebivolol 1.25 mg tablet, 28	C07AB12
		nebivolol	9312D	Nebilet	nebivolol 10 mg tablet, 28	C07AB12
		nebivolol	9311C	Nebilet	nebivolol 5 mg tablet, 28	C07AB12
		oxprenolol	2942W	Corbeton 20	oxprenolol hydrochloride 20 mg tablet, 100	C07AA02
		oxprenolol	2961W	Corbeton 40	oxprenolol hydrochloride 40 mg tablet, 100	C07AA02
		pindolol	3065H	Visken 15	pindolol 15 mg tablet, 50	C07AA03
		pindolol	3062E	Barbloc 5	pindolol 5 mg tablet, 100	C07AA03
		propranolol	2565B	Deralin 10	propranolol hydrochloride 10 mg tablet, 100	C07AA05
		propranolol	2899N	Deralin 160	propranolol hydrochloride 160 mg tablet, 50	C07AA05
		propranolol	2566C	Deralin 40	propranolol hydrochloride 40 mg tablet, 100	C07AA05
	Calcium Channel Blockers	amlodipine	1345T	Amlo 10	amlodipine 10 mg tablet, 30	C08CA01
		amlodipine	2752W	Nordip	amlodipine 10 mg tablet, 30	C08CA01
		amlodipine	1343Q	Amlo 5	amlodipine 5 mg tablet, 30	C08CA01
		amlodipine	2751T	Nordip	amlodipine 5 mg tablet, 30	C08CA01
		amlodipine + atorvastatin	9053L	Cadivast 10/10	amlodipine 10 mg + atorvastatin 10 mg tablet, 30	C10BX03
		amlodipine + atorvastatin	9054M	Cadivast 10/20	amlodipine 10 mg + atorvastatin 20 mg tablet, 30	C10BX03
		amlodipine + atorvastatin	9055N	Cadivast 10/40	amlodipine 10 mg + atorvastatin 40 mg tablet, 30	C10BX03
		amlodipine + atorvastatin	9056P	Cadivast 10/80	amlodipine 10 mg + atorvastatin 80 mg tablet, 30	C10BX03
		amlodipine + atorvastatin	9049G	Cadivast 5/10	amlodipine 5 mg + atorvastatin 10 mg tablet, 30	C10BX03
		amlodipine + atorvastatin	9050H	Cadivast 5/20	amlodipine 5 mg + atorvastatin 20 mg tablet, 30	C10BX03
		amlodipine + atorvastatin	9051J	Cadivast 5/40	amlodipine 5 mg + atorvastatin 40 mg tablet, 30	C10BX03
		amlodipine + atorvastatin	9052K	Cadivast 5/80	amlodipine 5 mg + atorvastatin 80 mg tablet, 30	C10BX03
		amlodipine besylate	8924Q	Norvasc	Tablet 10 mg (base)	C08CA01
		amlodipine besylate	8923P	Norvasc	Tablet 5 mg (base)	C08CA01
		diltiazem	1312C	Vasocardol CD	diltiazem hydrochloride 180 mg modified release capsule, 30	C08DB01
		diltiazem	1313D	Vasocardol CD	diltiazem hydrochloride 240 mg modified release capsule, 30	C08DB01
		diltiazem	8480H	Vasocardol CD	diltiazem hydrochloride 360 mg modified release capsule, 30	C08DB01
		felodipine	2367N	Fendex ER	felodipine 10 mg modified release tablet, 30	C08CA02
		felodipine	2361G	Fendex ER	felodipine 2.5 mg modified release tablet, 30	C08CA02
		felodipine	2366M	Fendex ER	felodipine 5 mg modified release tablet, 30	C08CA02
		lercanidipine	8534E	Zircol	lercanidipine hydrochloride 10 mg tablet, 28	C08CA13
		lercanidipine	8679T	Zircol	lercanidipine hydrochloride 20 mg tablet, 28	C08CA13
		lercanidipine + enalapril	9144G	Zan-Extra 10/10	lercanidipine hydrochloride 10 mg + enalapril maleate 10 mg tablet, 28	C09BB02
		lercanidipine + enalapril	9145H	Zan-Extra 10/20	lercanidipine hydrochloride 10 mg + enalapril maleate 20 mg tablet, 28	C09BB02
		lercanidipine hydrochloride	8939L	Zanidip	Tablet 10 mg	C08CA13
		lercanidipine hydrochloride	8940M	Zanidip	Tablet 20 mg	C08CA13
		nifedipine	8938K	Adalat Oros 20mg	Tablet 20 mg (controlled release)	C08CA05
		nifedipine	1694E	Adefin 10	nifedipine 10 mg tablet, 60	C08CA05
		nifedipine	8610E	Adalat Oros 20mg	nifedipine 20 mg modified release tablet, 30	C08CA05
		nifedipine	1695F	Adefin 20	nifedipine 20 mg tablet, 60	C08CA05
		nifedipine	1906H	Adefin XL 30	nifedipine 30 mg modified release tablet, 30	C08CA05
		nifedipine	1907J	Adefin XL 60	nifedipine 60 mg modified release tablet, 30	C08CA05
		olmesartan medoxomil + amlodipine	5292M	Olmesartan/Amlodipine - MYL 20/5	olmesartan medoxomil 20 mg + amlodipine 5 mg tablet, 30	C09DB02
		olmesartan medoxomil + amlodipine	5294P	Olmesartan/Amlodipine - MYL 40/10	olmesartan medoxomil 40 mg + amlodipine 10 mg tablet, 30	C09DB02
		olmesartan medoxomil + amlodipine	5293N	Olmesartan/Amlodipine - MYL 40/5	olmesartan medoxomil 40 mg + amlodipine 5 mg tablet, 30	C09DB02
		perindopril + amlodipine	9349C	Reaptan 10/10	perindopril arginine 10 mg + amlodipine 10 mg tablet, 30	C09BB04
		perindopril + amlodipine	9348B	Reaptan 10/5	perindopril arginine 10 mg + amlodipine 5 mg tablet, 30	C09BB04
		perindopril + amlodipine	9347Y	Reaptan 5/10	perindopril arginine 5 mg + amlodipine 10 mg tablet, 30	C09BB04
		perindopril + amlodipine	9346X	Reaptan 5/5	perindopril arginine 5 mg + amlodipine 5 mg tablet, 30	C09BB04
		ramipril + felodipine	2626F	Triasyn 2.5/2.5	ramipril 2.5 mg + felodipine 2.5 mg modified release tablet, 30	C09BB05
		ramipril + felodipine	2629J	Triasyn 5.0/5.0	ramipril 5 mg + felodipine 5 mg modified release tablet, 30	C09BB05
		trandolapril + verapamil	9387C	Tarka 2/180	trandolapril 2 mg + verapamil hydrochloride 180 mg modified release tablet, 28	C09BB10
		trandolapril + verapamil	2857J	Tarka 4/240	trandolapril 4 mg + verapamil hydrochloride 240 mg modified release tablet, 28	C09BB10
		verapamil	1254B	Isoptin	verapamil hydrochloride 120 mg tablet, 100	C08DA01
		verapamil	2206D	Veracaps SR	verapamil hydrochloride 160 mg modified release capsule, 30	C08DA01
		verapamil	2208F	Isoptin 180 SR	verapamil hydrochloride 180 mg modified release tablet, 30	C08DA01
		verapamil	2207E	Veracaps SR	verapamil hydrochloride 240 mg modified release capsule, 30	C08DA01
		verapamil	1241H	Isoptin SR	verapamil hydrochloride 240 mg modified release tablet, 30	C08DA01
		verapamil	1248Q	Anpec 40	verapamil hydrochloride 40 mg tablet, 100	C08DA01
		verapamil	1250T	Anpec 80	verapamil hydrochloride 80 mg tablet, 100	C08DA01
		verapamil hydrochloride	1060T	Isoptin	Injection 5 mg in 2 mL	C08DA01
		verapamil hydrochloride	3494X	Isoptin	Injection 5 mg in 2 mL	C08DA01
		verapamil hydrochloride	1253Y	Isoptin	Tablet 160 mg	C08DA01
	Diuretics	amiloride + hydrochlorothiazide	1486F	Moduretic	amiloride hydrochloride 5 mg + hydrochlorothiazide 50 mg tablet, 50	C03EA01
		amlodipine + valsartan + hydrochlorothiazide	5287G	Exforge HCT 10/160/12.5	amlodipine 10 mg + valsartan 160 mg + hydrochlorothiazide 12.5 mg tablet, 28	C09DX01
		amlodipine + valsartan + hydrochlorothiazide	5288H	Exforge HCT 10/160/25	amlodipine 10 mg + valsartan 160 mg + hydrochlorothiazide 25 mg tablet, 28	C09DX01
		amlodipine + valsartan + hydrochlorothiazide	5289J	Exforge HCT 10/320/25	amlodipine 10 mg + valsartan 320 mg + hydrochlorothiazide 25 mg tablet, 28	C09DX01
		amlodipine + valsartan + hydrochlorothiazide	5285E	Valsartan/Amlodipine/HCT Sandoz 160/5/12.5	amlodipine 5 mg + valsartan 160 mg + hydrochlorothiazide 12.5 mg tablet, 28	C09DX01
		amlodipine + valsartan + hydrochlorothiazide	5286F	Exforge HCT 5/160/25	amlodipine 5 mg + valsartan 160 mg + hydrochlorothiazide 25 mg tablet, 28	C09DX01
		candesartan + hydrochlorothiazide	8504N	Adesan HCT 16/12.5	candesartan cilexetil 16 mg + hydrochlorothiazide 12.5 mg tablet, 30	C09DA06
		candesartan + hydrochlorothiazide	9314F	Adesan HCT 32/12.5	candesartan cilexetil 32 mg + hydrochlorothiazide 12.5 mg tablet, 30	C09DA06
		candesartan + hydrochlorothiazide	9315G	Adesan HCT 32/25	candesartan cilexetil 32 mg + hydrochlorothiazide 25 mg tablet, 30	C09DA06
		enalapril + hydrochlorothiazide	8477E	Renitec Plus 20/6	enalapril maleate 20 mg + hydrochlorothiazide 6 mg tablet, 30	C09BA02
		eprosartan + hydrochlorothiazide	8624X	Teveten Plus 600/12.5	eprosartan 600 mg + hydrochlorothiazide 12.5 mg tablet, 28	C09DA02
		fosinopril + hydrochlorothiazide	8400D	Monoplus 10/12.5	fosinopril sodium 10 mg + hydrochlorothiazide 12.5 mg tablet, 30	C09BA09
		fosinopril + hydrochlorothiazide	8401E	Fosinopril/HCT Actavis 20/12.5	fosinopril sodium 20 mg + hydrochlorothiazide 12.5 mg tablet, 30	C09BA09
		hydrochlorothiazide	1484D	Dithiazide	hydrochlorothiazide 25 mg tablet, 100	C03AA03
		hydrochlorothiazide + triamterene	1280J	Hydrene 25/50	hydrochlorothiazide 25 mg + triamterene 50 mg tablet, 100	C03EA01
		indapamide	8532C	Odaplix SR	indapamide hemihydrate 1.5 mg modified release tablet, 90	C03BA11
		indapamide	2436F	Dapa-Tabs	indapamide hemihydrate 2.5 mg tablet, 90	C03BA11
		irbesartan + hydrochlorothiazide	8404H	Abisart HCT 150/12.5	irbesartan 150 mg + hydrochlorothiazide 12.5 mg tablet, 30	C09DA04
		irbesartan + hydrochlorothiazide	8405J	Abisart HCT 300/12.5	irbesartan 300 mg + hydrochlorothiazide 12.5 mg tablet, 30	C09DA04
		irbesartan + hydrochlorothiazide	2136K	Abisart HCT 300/25	irbesartan 300 mg + hydrochlorothiazide 25 mg tablet, 30	C09DA04
		olmesartan + amlodipine + hydrochlorothiazide	10005N	Sevikar HCT 20/5/12.5	olmesartan medoxomil 20 mg + amlodipine 5 mg + hydrochlorothiazide 12.5 mg tablet, 30	C09DX03
		olmesartan + amlodipine + hydrochlorothiazide	2836G	Sevikar HCT 40/10/12.5	olmesartan medoxomil 40 mg + amlodipine 10 mg + hydrochlorothiazide 12.5 mg tablet, 30	C09DX03
		olmesartan + amlodipine + hydrochlorothiazide	2953K	Sevikar HCT 40/10/25	olmesartan medoxomil 40 mg + amlodipine 10 mg + hydrochlorothiazide 25 mg tablet, 30	C09DX03
		olmesartan + amlodipine + hydrochlorothiazide	2880N	Sevikar HCT 40/5/12.5	olmesartan medoxomil 40 mg + amlodipine 5 mg + hydrochlorothiazide 12.5 mg tablet, 30	C09DX03
		olmesartan + amlodipine + hydrochlorothiazide	2864R	Sevikar HCT 40/5/25	olmesartan medoxomil 40 mg + amlodipine 5 mg + hydrochlorothiazide 25 mg tablet, 30	C09DX03
		olmesartan medoxomil + hydrochlorothiazide	2161R	Olmesartan HCT - MYL 20/12.5	olmesartan medoxomil 20 mg + hydrochlorothiazide 12.5 mg tablet, 30	C09DA08
		olmesartan medoxomil + hydrochlorothiazide	2166B	Olmesartan HCT - MYL 40/12.5	olmesartan medoxomil 40 mg + hydrochlorothiazide 12.5 mg tablet, 30	C09DA08
		olmesartan medoxomil + hydrochlorothiazide	2170F	Olmesartan HCT - MYL 40/25	olmesartan medoxomil 40 mg + hydrochlorothiazide 25 mg tablet, 30	C09DA08
		perindopril + indapamide	2190G	PREXUM Combi LD 2.5/0.625	perindopril arginine 2.5 mg + indapamide hemihydrate 625 microgram tablet, 30	C09BA04
		perindopril + indapamide	2845R	Prexum Combi 5/1.25	perindopril arginine 5 mg + indapamide hemihydrate 1.25 mg tablet, 30	C09BA04
		perindopril + indapamide	8449Q	Perindo Combi 4/1.25	perindopril erbumine 4 mg + indapamide hemihydrate 1.25 mg tablet, 30	C09BA04
		quinapril + hydrochlorothiazide	8589C	Accuretic 10/12.5mg	quinapril 10 mg + hydrochlorothiazide 12.5 mg tablet, 30	C09BA06
		quinapril + hydrochlorothiazide	8590D	Accuretic 20/12.5mg	quinapril 20 mg + hydrochlorothiazide 12.5 mg tablet, 30	C09BA06
		telmisartan + hydrochlorothiazide	8622T	Mizart HCT 40/12.5 mg	telmisartan 40 mg + hydrochlorothiazide 12.5 mg tablet, 28	C09DA07
		telmisartan + hydrochlorothiazide	8623W	Mizart HCT 80/12.5 mg	telmisartan 80 mg + hydrochlorothiazide 12.5 mg tablet, 28	C09DA07
		telmisartan + hydrochlorothiazide	9381R	Mizart HCT 80/25 mg	telmisartan 80 mg + hydrochlorothiazide 25 mg tablet, 28	C09DA07
		valsartan + hydrochlorothiazide	9373H	Dilart HCT 160/12.5	valsartan 160 mg + hydrochlorothiazide 12.5 mg tablet, 28	C09DA03
		valsartan + hydrochlorothiazide	9374J	Dilart HCT 160/25	valsartan 160 mg + hydrochlorothiazide 25 mg tablet, 28	C09DA03
		valsartan + hydrochlorothiazide	9481B	Dilart HCT 320/12.5	valsartan 320 mg + hydrochlorothiazide 12.5 mg tablet, 28	C09DA03
		valsartan + hydrochlorothiazide	9482C	Dilart HCT 320/25	valsartan 320 mg + hydrochlorothiazide 25 mg tablet, 28	C09DA03
		valsartan + hydrochlorothiazide	9372G	Dilart HCT 80/12.5	valsartan 80 mg + hydrochlorothiazide 12.5 mg tablet, 28	C09DA03

## Sheet: Diabetes
	Diabetes
	About:
	Any diabetes medication
	Drug Group	Drug	Drug Code	Brands	Form and Strength	ATC Code
	All Diabetes	acarbose	8189B	Acarbose Mylan	acarbose 100 mg tablet, 90	A10BF01
		acarbose	8188Y	Acarbose Mylan	acarbose 50 mg tablet, 90	A10BF01
		alogliptin	2933J	Nesina	alogliptin 12.5 mg tablet, 28	A10BH04
		alogliptin	2986E	Nesina	alogliptin 25 mg tablet, 28	A10BH04
		alogliptin	2944Y	Nesina	alogliptin 6.25 mg tablet, 28	A10BH04
		alogliptin + metformin	10033C	Nesina Met 12.5/500	alogliptin 12.5 mg + metformin hydrochloride 500 mg tablet, 56	A10BD13
		alogliptin + metformin	10032B	Nesina Met 12.5/850	alogliptin 12.5 mg + metformin hydrochloride 850 mg tablet, 56	A10BD13
		alogliptin + metformin	10035E	Nesina Met 12.5/1000	alogliptin 12.5 mg + metformin hydrochloride 1 g tablet, 56	A10BD13
		canagliflozin	2873F	Invokana	canagliflozin 100 mg tablet, 30	A10BX11
		canagliflozin	2987F	Invokana	canagliflozin 300 mg tablet, 30	A10BX11
		dapagliflozin	10011X	Forxiga	dapagliflozin 10 mg tablet, 28	A10BK01, A10BX09
		dapagliflozin + metformin	10510E	Xigduo XR 5/1000	dapagliflozin 5 mg + metformin hydrochloride 1 g modified release tablet, 56	A10BD15
		dapagliflozin + metformin	10516L	Xigduo XR 10/500	dapagliflozin 10 mg + metformin hydrochloride 500 mg modified release tablet, 28	A10BD15
		dapagliflozin + metformin	10515K	Xigduo XR 10/1000	dapagliflozin 10 mg + metformin hydrochloride 1 g modified release tablet, 28	A10BD15
		empagliflozin	10206E	Jardiance	empagliflozin 10 mg tablet, 30	A10BK03
		empagliflozin	10202Y	Jardiance	empagliflozin 25 mg tablet, 30	A10BK03
		empagliflozin + metformin	10639Y	Jardiamet 12.5 mg/500 mg	empagliflozin 12.5 mg + metformin hydrochloride 500 mg tablet, 60	A10BD20
		empagliflozin + metformin	10627H	Jardiamet 5 mg/1000 mg	empagliflozin 5 mg + metformin hydrochloride 1 g tablet, 60	A10BD20
		empagliflozin + metformin	10649L	Jardiamet 5 mg/1000 mg	empagliflozin 5 mg + metformin hydrochloride 1 g tablet, 60	A10BD20
		empagliflozin + metformin	10626G	Jardiamet 5 mg/500 mg	empagliflozin 5 mg + metformin hydrochloride 500 mg tablet, 60	A10BD20
		empagliflozin + metformin	10677Y	Jardiamet 12.5 mg/1000 mg	empagliflozin 12.5 mg + metformin hydrochloride 1 g tablet, 60	A10BD20
		empagliflozin + metformin	10640B	Jardiamet 12.5 mg/1000 mg	empagliflozin 12.5 mg + metformin hydrochloride 1 g tablet, 60	A10BD20
		empagliflozin + metformin	10633P	Jardiamet 12.5 mg/500 mg	empagliflozin 12.5 mg + metformin hydrochloride 500 mg tablet, 60	A10BD20
		empagliflozin + metformin	10650M	Jardiamet 5 mg/500 mg	empagliflozin 5 mg + metformin hydrochloride 500 mg tablet, 60	A10BD20
		exenatide	3424F	Byetta 10 microgram	exenatide 10 microgram/dose injection, 60 doses	A10BJ01, A10BX04
		exenatide	3423E	Byetta 5 microgram	exenatide 5 microgram/dose injection, 60 doses	A10BJ01, A10BX04
		exenatide	10888C	Bydureon	exenatide 2 mg/dose injection: modified release, 4 injection devices	A10BJ01
		glibenclamide	2939Q	Daonil	glibenclamide 5 mg tablet, 100	A10BB01
		gliclazide	9302N	ARDIX GLICLAZIDE 60mg MR	gliclazide 60 mg modified release tablet, 60	A10BB09
		gliclazide	2449X	Glyade	gliclazide 80 mg tablet, 100	A10BB09
		gliclazide	8535F	Glyade MR	gliclazide 30 mg modified release tablet, 100	A10BB09
		glimepiride	8451T	Aylide 2	glimepiride 2 mg tablet, 30	A10BB12
		glimepiride	8450R	Aylide 1	glimepiride 1 mg tablet, 30	A10BB12
		glimepiride	8533D	Aylide 3	glimepiride 3 mg tablet, 30	A10BB12
		glimepiride	8452W	Aylide 4	glimepiride 4 mg tablet, 30	A10BB12
		glipizide	2440K	Melizide	glipizide 5 mg tablet, 100	A10BB07
		insulin aspart	8435Y	NovoRapid FlexPen	insulin aspart 100 units/mL injection, 5 x 3 mL cartridges	A10AB05
		insulin aspart	8571D	NovoRapid	insulin aspart 100 units/mL injection, 1 x 10 mL vial	A10AB05
		insulin aspart + insulin aspart protamine	8609D	NovoMix 30 FlexPen	insulin aspart 30 units/mL + insulin aspart protamine 70 units/mL injection, 5 x 3 mL syringes	A10AD
		insulin detemir	9040T	Levemir FlexPen	insulin detemir 100 units/mL injection, 5 x 3 mL cartridges	A10AE05
		insulin glargine	9039R	Lantus SoloStar	insulin glargine 100 units/mL injection, 5 x 3 mL cartridges	A10AE04
		insulin glargine	11308E	Toujeo Solostar	insulin glargine 300 units/mL injection, 3 x 1.5 mL injection devices	A10AE04
		insulin glargine	11302W	Toujeo Solostar	insulin glargine 300 units/mL injection, 5 x 1.5 mL injection devices	A10AE04
		insulin glulisine	1921D	Apidra	insulin glulisine 100 units/mL injection, 5 x 3 mL cartridges	A10AB06
		insulin glulisine	9224L	Apidra	insulin glulisine 100 units/mL injection, 1 x 10 mL vial	A10AB06
		insulin isophane bovine	1711C	Hypurin Isophane	insulin isophane bovine 100 units/mL injection, 1 x 10 mL vial	A10AC02
		insulin isophane human	1533Q	Humulin NPH	insulin isophane human 100 units/mL injection, 1 x 10 mL vial	A10AC01
		insulin isophane human	1761Q	Humulin NPH	insulin isophane human 100 units/mL injection, 5 x 3 mL cartridges	A10AC01
		insulin isophane human + insulin neutral human	1763T	Humulin 30/70	insulin isophane human 70 units/mL + insulin neutral human 30 units/mL injection, 5 x 3 mL cartridges	A10AD01
		insulin isophane human + insulin neutral human	1426C	Humulin 30/70	insulin neutral human 30 units/mL + insulin isophane human 70 units/mL injection, 1 x 10 mL vial	A10AD01
		insulin isophane human + insulin neutral human	2062M	Mixtard 50/50 Penfill 3 mL	insulin neutral human 50 units/mL + insulin isophane human 50 units/mL injection, 5 x 3 mL cartridges	A10AD01
		insulin lispro	8212F	Humalog KwikPen	insulin lispro 100 units/mL injection, 5 x 3 mL cartridges	A10AB04
		insulin lispro	8084L	Humalog	insulin lispro 100 units/mL injection, 1 x 10 mL vial	A10AB04
		insulin lispro + insulin lispro protamine	8390N	Humalog Mix25 KwikPen	insulin lispro 25 units/mL + insulin lispro protamine 75 units/mL injection, 5 x 3 mL cartridges	A10AD04
		insulin lispro + insulin lispro protamine	8874C	Humalog Mix50 KwikPen	insulin lispro 50 units/mL + insulin lispro protamine 50 units/mL injection, 5 x 3 mL cartridges	A10AD04
		insulin neutral bovine	1713E	Hypurin Neutral	insulin neutral bovine 100 units/mL injection, 1 x 10 mL vial	A10AB02
		insulin neutral human	1531N	Humulin R	insulin neutral human 100 units/mL injection, 1 x 10 mL vial	A10AB01
		insulin neutral human	1762R	Humulin R	insulin neutral human 100 units/mL injection, 5 x 3 mL cartridges	A10AB01
		insulin neutral-insulin isophane (n.p.h.), (mixed) (biphasic isophane)	8006J	Mixtard 20/80 Penfill 3 mL	Injections (human) 100 units (20 units-80 units) per mL, 3 mL,5	A10AD01
		insulin neutral-insulin isophane (n.p.h.), (mixed) (biphasic isophane)	1425B	Mixtard 50/50	Injection (human) 100 units (50 units-50 units) per mL, 10 mL	A10AD01
		linagliptin	3387G	Trajenta	linagliptin 5 mg tablet, 30	A10BH05
		linagliptin + metformin	10045Q	Trajentamet	linagliptin 2.5 mg + metformin hydrochloride 850 mg tablet, 60	A10BD11
		linagliptin + metformin	10044P	Trajentamet	linagliptin 2.5 mg + metformin hydrochloride 1 g tablet, 60	A10BD11
		linagliptin + metformin	10038H	Trajentamet	linagliptin 2.5 mg + metformin hydrochloride 500 mg tablet, 60	A10BD11
		metformin	9435N	Diaformin XR	metformin hydrochloride 500 mg modified release tablet, 120	A10BA02
		metformin	1801T	Diaformin 850	metformin hydrochloride 850 mg tablet, 60	A10BA02
		metformin	8607B	Diaformin 1000	metformin hydrochloride 1 g tablet, 90	A10BA02
		metformin	3439B	Diaformin XR 1000	metformin hydrochloride 1 g modified release tablet, 60	A10BA02
		metformin	2430X	Diaformin	metformin hydrochloride 500 mg tablet, 100	A10BA02
		metformin + glibenclamide	8811R	Glucovance 500mg/5mg	metformin hydrochloride 500 mg + glibenclamide 5 mg tablet, 90	A10BD02
		metformin + glibenclamide	8810Q	Glucovance 500mg/2.5mg	metformin hydrochloride 500 mg + glibenclamide 2.5 mg tablet, 90	A10BD02
		metformin + glibenclamide	8838E	Glucovance 250mg/1.25mg	metformin hydrochloride 250 mg + glibenclamide 1.25 mg tablet, 90	A10BD02
		metformin hydrochloride	8884N	Diabex XR	Tablet 500 mg (extended release)	A10BA02
		pioglitazone	8696Q	Vexazone	pioglitazone 45 mg tablet, 28	A10BG03
		pioglitazone	8695P	Vexazone	pioglitazone 30 mg tablet, 28	A10BG03
		pioglitazone	8694N	Vexazone	pioglitazone 15 mg tablet, 28	A10BG03
		rosiglitazone	8690J	Avandia	rosiglitazone 8 mg tablet, 28	A10BG02
		rosiglitazone	8689H	Avandia	rosiglitazone 4 mg tablet, 28	A10BG02
		rosiglitazone + metformin	9060W	Avandamet	rosiglitazone 2 mg + metformin hydrochloride 1 g tablet, 56	A10BD03
		rosiglitazone + metformin	9059T	Avandamet	rosiglitazone 2 mg + metformin hydrochloride 500 mg tablet, 56	A10BD03
		rosiglitazone + metformin	9062Y	Avandamet	rosiglitazone 4 mg + metformin hydrochloride 1 g tablet, 56	A10BD03
		rosiglitazone + metformin	9061X	Avandamet	rosiglitazone 4 mg + metformin hydrochloride 500 mg tablet, 56	A10BD03
		saxagliptin	8983T	Onglyza	saxagliptin 5 mg tablet, 28	A10BH03
		saxagliptin	10128C	Onglyza	saxagliptin 2.5 mg tablet, 28	A10BH03
		saxagliptin + metformin	10055F	Kombiglyze XR 5/500	saxagliptin 5 mg + metformin hydrochloride 500 mg modified release tablet, 28	A10BD10
		saxagliptin + metformin	10048W	Kombiglyze XR 2.5/1000	saxagliptin 2.5 mg + metformin hydrochloride 1 g modified release tablet, 56	A10BD10
		saxagliptin + metformin	10051B	Kombiglyze XR 5/1000	saxagliptin 5 mg + metformin hydrochloride 1 g modified release tablet, 28	A10BD10
		simvastatin + sitagliptin	2383K	Juvicor	simvastatin 40 mg + sitagliptin 100 mg tablet: film-coated, 28	A10BH51
		simvastatin + sitagliptin	2377D	Juvicor	simvastatin 20 mg + sitagliptin 100 mg tablet: film-coated, 28	A10BH51
		simvastatin + sitagliptin	2391W	Juvicor	simvastatin 10 mg + sitagliptin 100 mg tablet: film-coated, 28	A10BH51
		sitagliptin	9180E	Januvia	sitagliptin 25 mg tablet, 28	A10BH01
		sitagliptin	9182G	Januvia	sitagliptin 100 mg tablet, 28	A10BH01
		sitagliptin	9181F	Januvia	sitagliptin 50 mg tablet, 28	A10BH01
		sitagliptin + metformin	9451K	Janumet	sitagliptin 50 mg + metformin hydrochloride 1 g tablet, 56	A10BD07
		sitagliptin + metformin	10090C	Janumet XR	sitagliptin 50 mg + metformin hydrochloride 1 g modified release tablet, 56	A10BD07
		sitagliptin + metformin	9450J	Janumet	sitagliptin 50 mg + metformin hydrochloride 850 mg tablet, 56	A10BD07
		sitagliptin + metformin	9449H	Janumet	sitagliptin 50 mg + metformin hydrochloride 500 mg tablet, 56	A10BD07
		sitagliptin + metformin	10089B	Janumet XR	sitagliptin 100 mg + metformin hydrochloride 1 g tablet: modified release, 28	A10BD07
		vildagliptin	3415R	Galvus	vildagliptin 50 mg tablet, 60	A10BH02
		vildagliptin + metformin	5474D	Galvumet 50/500	vildagliptin 50 mg + metformin hydrochloride 500 mg tablet, 60	A10BD08
		vildagliptin + metformin	5475E	Galvumet 50/850	vildagliptin 50 mg + metformin hydrochloride 850 mg tablet, 60	A10BD08
		vildagliptin + metformin	5476F	Galvumet 50/1000	vildagliptin 50 mg + metformin hydrochloride 1 g tablet, 60	A10BD08
	Diabetes - Excl Insulin	acarbose	8189B	Acarbose Mylan	acarbose 100 mg tablet, 90	A10BF01
		acarbose	8188Y	Acarbose Mylan	acarbose 50 mg tablet, 90	A10BF01
		alogliptin	2933J	Nesina	alogliptin 12.5 mg tablet, 28	A10BH04
		alogliptin	2986E	Nesina	alogliptin 25 mg tablet, 28	A10BH04
		alogliptin	2944Y	Nesina	alogliptin 6.25 mg tablet, 28	A10BH04
		alogliptin + metformin	10035E	Nesina Met 12.5/1000	alogliptin 12.5 mg + metformin hydrochloride 1 g tablet, 56	A10BD13
		alogliptin + metformin	10033C	Nesina Met 12.5/500	alogliptin 12.5 mg + metformin hydrochloride 500 mg tablet, 56	A10BD13
		alogliptin + metformin	10032B	Nesina Met 12.5/850	alogliptin 12.5 mg + metformin hydrochloride 850 mg tablet, 56	A10BD13
		canagliflozin	2873F	Invokana	canagliflozin 100 mg tablet, 30	A10BX11
		canagliflozin	2987F	Invokana	canagliflozin 300 mg tablet, 30	A10BX11
		dapagliflozin	10011X	Forxiga	dapagliflozin 10 mg tablet, 28	A10BK01
		dapagliflozin + metformin	10515K	Xigduo XR 10/1000	dapagliflozin 10 mg + metformin hydrochloride 1 g modified release tablet, 28	A10BD15
		dapagliflozin + metformin	10516L	Xigduo XR 10/500	dapagliflozin 10 mg + metformin hydrochloride 500 mg modified release tablet, 28	A10BD15
		dapagliflozin + metformin	10510E	Xigduo XR 5/1000	dapagliflozin 5 mg + metformin hydrochloride 1 g modified release tablet, 56	A10BD15
		empagliflozin	10206E	Jardiance	empagliflozin 10 mg tablet, 30	A10BK03
		empagliflozin	10202Y	Jardiance	empagliflozin 25 mg tablet, 30	A10BK03
		empagliflozin + metformin	10640B	Jardiamet 12.5 mg/1000 mg	empagliflozin 12.5 mg + metformin hydrochloride 1 g tablet, 60	A10BD20
		empagliflozin + metformin	10677Y	Jardiamet 12.5 mg/1000 mg	empagliflozin 12.5 mg + metformin hydrochloride 1 g tablet, 60	A10BD20
		empagliflozin + metformin	10633P	Jardiamet 12.5 mg/500 mg	empagliflozin 12.5 mg + metformin hydrochloride 500 mg tablet, 60	A10BD20
		empagliflozin + metformin	10639Y	Jardiamet 12.5 mg/500 mg	empagliflozin 12.5 mg + metformin hydrochloride 500 mg tablet, 60	A10BD20
		empagliflozin + metformin	10627H	Jardiamet 5 mg/1000 mg	empagliflozin 5 mg + metformin hydrochloride 1 g tablet, 60	A10BD20
		empagliflozin + metformin	10649L	Jardiamet 5 mg/1000 mg	empagliflozin 5 mg + metformin hydrochloride 1 g tablet, 60	A10BD20
		empagliflozin + metformin	10626G	Jardiamet 5 mg/500 mg	empagliflozin 5 mg + metformin hydrochloride 500 mg tablet, 60	A10BD20
		empagliflozin + metformin	10650M	Jardiamet 5 mg/500 mg	empagliflozin 5 mg + metformin hydrochloride 500 mg tablet, 60	A10BD20
		exenatide	3424F	Byetta 10 microgram	exenatide 10 microgram/dose injection, 60 doses	A10BJ01
		exenatide	10888C	Bydureon	exenatide 2 mg/dose injection: modified release, 4 injection devices	A10BJ01
		exenatide	3423E	Byetta 5 microgram	exenatide 5 microgram/dose injection, 60 doses	A10BJ01
		glibenclamide	2939Q	Daonil	glibenclamide 5 mg tablet, 100	A10BB01
		gliclazide	8535F	Glyade MR	gliclazide 30 mg modified release tablet, 100	A10BB09
		gliclazide	9302N	ARDIX GLICLAZIDE 60mg MR	gliclazide 60 mg modified release tablet, 60	A10BB09
		gliclazide	2449X	Glyade	gliclazide 80 mg tablet, 100	A10BB09
		glimepiride	8450R	Aylide 1	glimepiride 1 mg tablet, 30	A10BB12
		glimepiride	8451T	Aylide 2	glimepiride 2 mg tablet, 30	A10BB12
		glimepiride	8533D	Aylide 3	glimepiride 3 mg tablet, 30	A10BB12
		glimepiride	8452W	Aylide 4	glimepiride 4 mg tablet, 30	A10BB12
		glipizide	2440K	Melizide	glipizide 5 mg tablet, 100	A10BB07
		linagliptin	3387G	Trajenta	linagliptin 5 mg tablet, 30	A10BH05
		linagliptin + metformin	10044P	Trajentamet	linagliptin 2.5 mg + metformin hydrochloride 1 g tablet, 60	A10BD11
		linagliptin + metformin	10038H	Trajentamet	linagliptin 2.5 mg + metformin hydrochloride 500 mg tablet, 60	A10BD11
		linagliptin + metformin	10045Q	Trajentamet	linagliptin 2.5 mg + metformin hydrochloride 850 mg tablet, 60	A10BD11
		metformin	3439B	Diaformin XR 1000	metformin hydrochloride 1 g modified release tablet, 60	A10BA02
		metformin	8607B	Diaformin 1000	metformin hydrochloride 1 g tablet, 90	A10BA02
		metformin	9435N	Diaformin XR	metformin hydrochloride 500 mg modified release tablet, 120	A10BA02
		metformin	2430X	Diaformin	metformin hydrochloride 500 mg tablet, 100	A10BA02
		metformin	1801T	Diaformin 850	metformin hydrochloride 850 mg tablet, 60	A10BA02
		metformin + glibenclamide	8838E	Glucovance 250mg/1.25mg	metformin hydrochloride 250 mg + glibenclamide 1.25 mg tablet, 90	A10BD02
		metformin + glibenclamide	8810Q	Glucovance 500mg/2.5mg	metformin hydrochloride 500 mg + glibenclamide 2.5 mg tablet, 90	A10BD02
		metformin + glibenclamide	8811R	Glucovance 500mg/5mg	metformin hydrochloride 500 mg + glibenclamide 5 mg tablet, 90	A10BD02
		metformin hydrochloride	8884N	Diabex XR	Tablet 500 mg (extended release)	A10BA02
		pioglitazone	8694N	Vexazone	pioglitazone 15 mg tablet, 28	A10BG03
		pioglitazone	8695P	Vexazone	pioglitazone 30 mg tablet, 28	A10BG03
		pioglitazone	8696Q	Vexazone	pioglitazone 45 mg tablet, 28	A10BG03
		rosiglitazone	8689H	Avandia	rosiglitazone 4 mg tablet, 28	A10BG02
		rosiglitazone	8690J	Avandia	rosiglitazone 8 mg tablet, 28	A10BG02
		rosiglitazone + metformin	9060W	Avandamet	rosiglitazone 2 mg + metformin hydrochloride 1 g tablet, 56	A10BD03
		rosiglitazone + metformin	9059T	Avandamet	rosiglitazone 2 mg + metformin hydrochloride 500 mg tablet, 56	A10BD03
		rosiglitazone + metformin	9062Y	Avandamet	rosiglitazone 4 mg + metformin hydrochloride 1 g tablet, 56	A10BD03
		rosiglitazone + metformin	9061X	Avandamet	rosiglitazone 4 mg + metformin hydrochloride 500 mg tablet, 56	A10BD03
		saxagliptin	10128C	Onglyza	saxagliptin 2.5 mg tablet, 28	A10BH03
		saxagliptin	8983T	Onglyza	saxagliptin 5 mg tablet, 28	A10BH03
		saxagliptin + metformin	10048W	Kombiglyze XR 2.5/1000	saxagliptin 2.5 mg + metformin hydrochloride 1 g modified release tablet, 56	A10BD10
		saxagliptin + metformin	10051B	Kombiglyze XR 5/1000	saxagliptin 5 mg + metformin hydrochloride 1 g modified release tablet, 28	A10BD10
		saxagliptin + metformin	10055F	Kombiglyze XR 5/500	saxagliptin 5 mg + metformin hydrochloride 500 mg modified release tablet, 28	A10BD10
		simvastatin + sitagliptin	2391W	Juvicor	simvastatin 10 mg + sitagliptin 100 mg tablet: film-coated, 28	A10BH51
		simvastatin + sitagliptin	2377D	Juvicor	simvastatin 20 mg + sitagliptin 100 mg tablet: film-coated, 28	A10BH51
		simvastatin + sitagliptin	2383K	Juvicor	simvastatin 40 mg + sitagliptin 100 mg tablet: film-coated, 28	A10BH51
		sitagliptin	9182G	Januvia	sitagliptin 100 mg tablet, 28	A10BH01
		sitagliptin	9180E	Januvia	sitagliptin 25 mg tablet, 28	A10BH01
		sitagliptin	9181F	Januvia	sitagliptin 50 mg tablet, 28	A10BH01
		sitagliptin + metformin	10089B	Janumet XR	sitagliptin 100 mg + metformin hydrochloride 1 g tablet: modified release, 28	A10BD07
		sitagliptin + metformin	10090C	Janumet XR	sitagliptin 50 mg + metformin hydrochloride 1 g modified release tablet, 56	A10BD07
		sitagliptin + metformin	9451K	Janumet	sitagliptin 50 mg + metformin hydrochloride 1 g tablet, 56	A10BD07
		sitagliptin + metformin	9449H	Janumet	sitagliptin 50 mg + metformin hydrochloride 500 mg tablet, 56	A10BD07
		sitagliptin + metformin	9450J	Janumet	sitagliptin 50 mg + metformin hydrochloride 850 mg tablet, 56	A10BD07
		vildagliptin	3415R	Galvus	vildagliptin 50 mg tablet, 60	A10BH02
		vildagliptin + metformin	5476F	Galvumet 50/1000	vildagliptin 50 mg + metformin hydrochloride 1 g tablet, 60	A10BD08
		vildagliptin + metformin	5474D	Galvumet 50/500	vildagliptin 50 mg + metformin hydrochloride 500 mg tablet, 60	A10BD08
		vildagliptin + metformin	5475E	Galvumet 50/850	vildagliptin 50 mg + metformin hydrochloride 850 mg tablet, 60	A10BD08
	Insulins Only	insulin aspart	8571D	NovoRapid	insulin aspart 100 units/mL injection, 1 x 10 mL vial	A10AB05
		insulin aspart	8435Y	NovoRapid FlexPen	insulin aspart 100 units/mL injection, 5 x 3 mL cartridges	A10AB05
		insulin aspart + insulin aspart protamine	8609D	NovoMix 30 FlexPen	insulin aspart 30 units/mL + insulin aspart protamine 70 units/mL injection, 5 x 3 mL syringes	A10AD
		insulin detemir	9040T	Levemir FlexPen	insulin detemir 100 units/mL injection, 5 x 3 mL cartridges	A10AE05
		insulin glargine	11302W	Toujeo Solostar	insulin glargine 300 units/mL injection, 5 x 1.5 mL injection devices	A10AE04
		insulin glargine	9039R	Lantus SoloStar	insulin glargine 100 units/mL injection, 5 x 3 mL cartridges	A10AE04
		insulin glargine	11308E	Toujeo Solostar	insulin glargine 300 units/mL injection, 3 x 1.5 mL injection devices	A10AE04
		insulin glulisine	9224L	Apidra	insulin glulisine 100 units/mL injection, 1 x 10 mL vial	A10AB06
		insulin glulisine	1921D	Apidra	insulin glulisine 100 units/mL injection, 5 x 3 mL cartridges	A10AB06
		insulin isophane bovine	1711C	Hypurin Isophane	insulin isophane bovine 100 units/mL injection, 1 x 10 mL vial	A10AC02
		insulin isophane human	1533Q	Humulin NPH	insulin isophane human 100 units/mL injection, 1 x 10 mL vial	A10AC01
		insulin isophane human	1761Q	Humulin NPH	insulin isophane human 100 units/mL injection, 5 x 3 mL cartridges	A10AC01
		insulin isophane human + insulin neutral human	2062M	Mixtard 50/50 Penfill 3 mL	insulin neutral human 50 units/mL + insulin isophane human 50 units/mL injection, 5 x 3 mL cartridges	A10AD01
		insulin isophane human + insulin neutral human	1426C	Humulin 30/70	insulin neutral human 30 units/mL + insulin isophane human 70 units/mL injection, 1 x 10 mL vial	A10AD01
		insulin isophane human + insulin neutral human	1763T	Humulin 30/70	insulin isophane human 70 units/mL + insulin neutral human 30 units/mL injection, 5 x 3 mL cartridges	A10AD01
		insulin lispro	8212F	Humalog KwikPen	insulin lispro 100 units/mL injection, 5 x 3 mL cartridges	A10AB04
		insulin lispro	8084L	Humalog	insulin lispro 100 units/mL injection, 1 x 10 mL vial	A10AB04
		insulin lispro + insulin lispro protamine	8874C	Humalog Mix50 KwikPen	insulin lispro 50 units/mL + insulin lispro protamine 50 units/mL injection, 5 x 3 mL cartridges	A10AD04
		insulin lispro + insulin lispro protamine	8390N	Humalog Mix25 KwikPen	insulin lispro 25 units/mL + insulin lispro protamine 75 units/mL injection, 5 x 3 mL cartridges	A10AD04
		insulin neutral bovine	1713E	Hypurin Neutral	insulin neutral bovine 100 units/mL injection, 1 x 10 mL vial	A10AB02
		insulin neutral human	1531N	Humulin R	insulin neutral human 100 units/mL injection, 1 x 10 mL vial	A10AB01
		insulin neutral human	1762R	Humulin R	insulin neutral human 100 units/mL injection, 5 x 3 mL cartridges	A10AB01
		insulin neutral-insulin isophane (n.p.h.), (mixed) (biphasic isophane)	8006J	Mixtard 20/80 Penfill 3 mL	Injections (human) 100 units (20 units-80 units) per mL, 3 mL,5	A10AD01
